# Supplementary material
Source: Royal Society of Chemistry journal article supplement (doi:10.1039/d6cc03082c)
Supplement: d6cc03082c1.pdf [file d6cc03082c1.pdf]

## Supplementary Information

### Excited-State Palladium-Catalyzed Defluorinative Arylation of Polyfluoroarenes

Arnab Dey,<sup>†a</sup> Cătălin C. Anghel,<sup>†a</sup> Rajesh Kancharla<sup>a</sup> and Magnus Rueping<sup>\*a</sup>

<sup>a</sup>KAUST Catalysis Center (KCC), King Abdullah University of Science and Technology (KAUST), Thuwal, 23955-6900, Kingdom of Saudi Arabia.

Email: [magnus.rueping@kaust.edu.sa](mailto:magnus.rueping@kaust.edu.sa)

#### Table of Contents

1. General Information
2. Optimization details
3. General Procedure
4. Characterization Data
5. Mechanistic Investigation
6. UV-Vis spectral analysis
7. Light on-off experiment
8. Hammett Analysis
9. NMR spectra of products
10. References

## 1. General Information

Unless otherwise noted, all reactions were carried out under argon in a screw cap glass reaction vial. All the reagents and solvents were bought from Sigma Aldrich, Alfa Aesar, VWR, and TCI in a sure-seal bottle and were used as received without drying. Pd(OAc)<sub>2</sub>, Cs<sub>2</sub>CO<sub>3</sub>, and BrettPhos were obtained from Sigma Aldrich. All polyfluoroarenes and aryl boronic acids are commercially available and were used as received. Column chromatography was performed on silica gel (particle size 0.043–0.063 mm, 60 Å from Sepa Flash) by using the Biotage® Selekt System automatic purification system. A gradient elution using 100% pet. ether or DCM/pet. ether or, EtOAc/pet. ether was performed based on Merck aluminium TLC sheets (silica gel 60 F254), visualized by irradiation with UV light. Organic solutions were concentrated under reduced pressure on a Büchi rotary evaporator.

### 1.1 Analytical Information

All isolated compounds are characterized by <sup>1</sup>H NMR, <sup>13</sup>C NMR, <sup>19</sup>F NMR spectroscopy, and gas chromatography-mass spectra (GC-MS). Copies of the <sup>1</sup>H NMR, <sup>13</sup>C NMR, and <sup>19</sup>F NMR can be found in the supporting information. <sup>1</sup>H NMR spectra were recorded in deuterated solvents on Bruker Avance-II spectrometers at 400 or 500 MHz, with residual protic solvent as the internal standard (CDCl<sub>3</sub> referenced at 7.26 ppm). <sup>13</sup>C NMR spectra were recorded in deuterated solvents on Bruker Avance-II spectrometers at 101 or 125 MHz, with the central peak of the deuterated solvent as the internal standard (CDCl<sub>3</sub> referenced at 77.16 ppm). <sup>19</sup>F NMR spectra were recorded in deuterated solvents on Bruker Avance-II at 377 MHz. Chemical shifts ( $\delta$ ) are given in parts per million (ppm) and coupling constants ( $J$ ) are given in Hertz (Hz) rounded to the nearest 0.1 Hz. The <sup>1</sup>H NMR spectra are reported as  $\delta$ /ppm downfield from tetramethylsilane (multiplicity, number of protons, assignment, coupling constant  $J$ /Hz). The <sup>13</sup>C NMR spectra are reported as  $\delta$ /ppm and were obtained with <sup>1</sup>H decoupling and, if coupled to fluorine, multiplicity and coupling constant (Hz). Data are reported in the following order: chemical shift ( $\delta$ ) in ppm; multiplicities are indicated s (singlet), b (broad), d (doublet), t (triplet), q = quartet, dd = doublet of doublets, dt = doublet of triplets, ddd = doublet of doublets of doublets, dm = doublet of multiplets, m (multiplet); coupling constants ( $J$ ) are in Hertz (Hz). All GC analysis was performed on an Agilent 7890A GC system with an FID detector using a J&W HP-5ms column (10 m, 0.1 mm I.D.), and mesitylene was used as an internal standard. All GCMS analysis (EI-MS, 70 eV) was done by Agilent 7890A GC system with a J&W DB-5ms column (30 m, 0.1 mm I.D.) connected with 5975C inert XL EI/CI MSD (with triple axis detector). All reaction mixtures were irradiated with 34 W Kessil KSH150B from 3 cm away. Regular fans are employed to maintain ambient temperature ( $T = 33 \pm 2$  °C).

## 2. Optimization Details

**Table S1. Optimization of ligands for C(sp<sup>2</sup>)-C(sp<sup>2</sup>) cross-coupling**

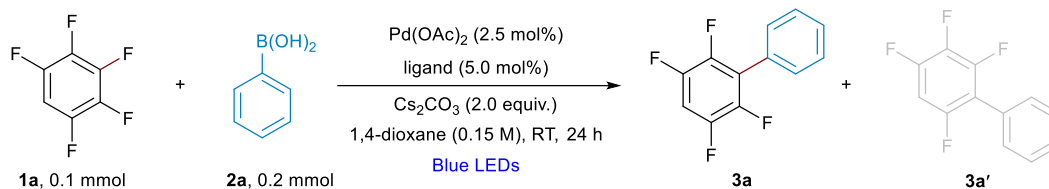

| Entry | Additive (mol%)  | % Yield of <b>3a</b> <sup>[a]</sup> | % Yield of <b>3a'</b> <sup>[a]</sup> |
|-------|------------------|-------------------------------------|--------------------------------------|
| 1     | BrettPhos        | 76                                  | 3                                    |
| 2     | PPh <sub>3</sub> | trace                               | trace                                |
| 3     | R-BINAP          | np                                  | np                                   |
| 4     | DavePhos         | np                                  | np                                   |
| 5     | RuPhos           | np                                  | np                                   |
| 6     | XPhos            | np                                  | np                                   |
| 7     | SPhos            | np                                  | np                                   |
| 8     | Xantphos         | np                                  | np                                   |

[a] Yields determined by GC-FID analysis using mesitylene as an internal standard. np = no product observed.

**Table S2. Optimization of solvents for C(sp<sup>2</sup>)-C(sp<sup>2</sup>) cross-coupling**

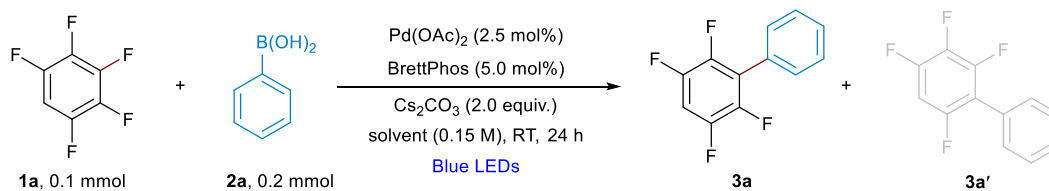

| Entry | solvent | % Yield of <b>3a</b> <sup>[a]</sup> | % Yield of <b>3a'</b> <sup>[a]</sup> |
|-------|---------|-------------------------------------|--------------------------------------|
| 1     | DMF     | 2                                   | trace                                |
| 2     | DMSO    | np                                  | np                                   |
| 3     | Toluene | 44                                  | 2                                    |
| 4     | HFIP    | np                                  | np                                   |
| 5     | DMA     | 6                                   | trace                                |
| 6     | DME     | 21                                  | trace                                |
| 7     | MeCN    | 10                                  | trace                                |
| 8     | THF     | 55                                  | 27                                   |

[a] Yields determined by GC-FID analysis using mesitylene as an internal standard. np = no product observed.

**Table S3. Optimization of loading of boronic acid for C(sp<sup>2</sup>)-C(sp<sup>2</sup>) cross-coupling**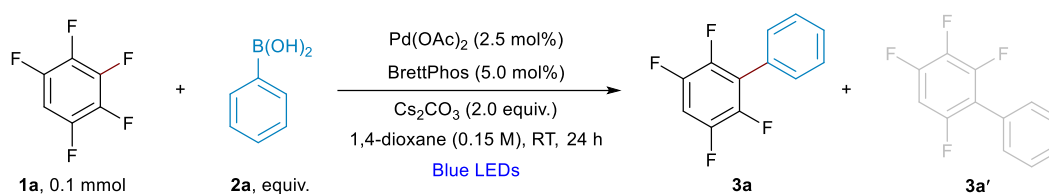

| Entry | 2a (equiv.) | % Yield of 3a <sup>[a]</sup> | % Yield of 3a' <sup>[a]</sup> |
|-------|-------------|------------------------------|-------------------------------|
| 1     | 1.0         | 25                           | trace                         |
| 2     | 1.5         | 44                           | 1                             |
| 3     | 3.0         | 81                           | 3                             |
| 4     | 3.5         | 78                           | 3                             |

[a] Yields determined by GC-FID analysis using mesitylene as an internal standard.

**Table S4. Optimization of Pd-catalyst for C(sp<sup>2</sup>)-C(sp<sup>2</sup>) cross-coupling**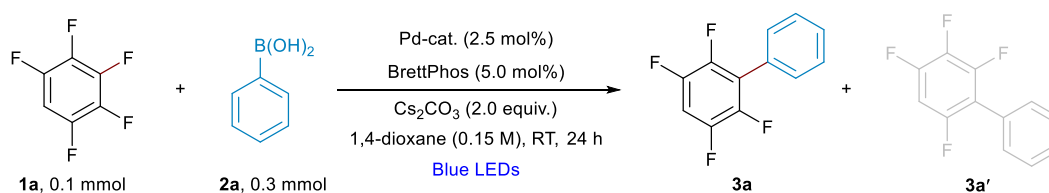

| Entry | Pd-cat. (2.5 mol%)                                    | % Yield of 3a <sup>[a]</sup> | % Yield of 3a' <sup>[a]</sup> |
|-------|-------------------------------------------------------|------------------------------|-------------------------------|
| 1     | Pd(acac) <sub>2</sub>                                 | np                           | np                            |
| 2     | PdCl <sub>2</sub>                                     | trace                        | trace                         |
| 3     | PdI <sub>2</sub>                                      | trace                        | trace                         |
| 4     | Pd(TFA) <sub>2</sub>                                  | 37                           | 1                             |
| 5     | PdCl <sub>2</sub> [P(cy) <sub>3</sub> ] <sub>2</sub>  | trace                        | trace                         |
| 6     | Pd(PPh <sub>3</sub> ) <sub>2</sub> Cl <sub>2</sub>    | trace                        | trace                         |
| 7     | Pd(MeCN) <sub>2</sub> Cl <sub>2</sub>                 | 29                           | trace                         |
| 8     | Pd(cod)Cl <sub>2</sub>                                | 34                           | trace                         |
| 9     | Pd(dppf)Cl <sub>2</sub>                               | trace                        | trace                         |
| 10    | Pd(OAc) <sub>2</sub> (PPh <sub>3</sub> ) <sub>2</sub> | trace                        | trace                         |
| 11    | PdBr <sub>2</sub>                                     | trace                        | trace                         |
| 12    | Pd(hfacac) <sub>2</sub>                               | 72                           | 3                             |
| 13    | [PdCl(C <sub>3</sub> H <sub>5</sub> ) <sub>2</sub> ]  | trace                        | trace                         |
| 14    | (PhCN) <sub>2</sub> PdCl <sub>2</sub>                 | 22                           | trace                         |
| 15    | Pd(PPh <sub>3</sub> ) <sub>4</sub>                    | 5                            | trace                         |

[a] Yields determined by GC-FID analysis using mesitylene as an internal standard. np = no product observed.

**Table S5. Optimization of loading of Pd-cat and ligand for C(sp<sup>2</sup>)-C(sp<sup>2</sup>) cross-coupling**

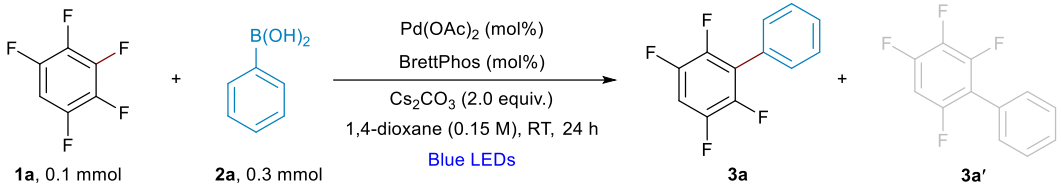

| Entry | Pd(OAc) <sub>2</sub> (mol%) | BrettPhos (mol%) | % Yield of <b>3a</b> <sup>[a]</sup> | % Yield of <b>3a'</b> <sup>[a]</sup> |
|-------|-----------------------------|------------------|-------------------------------------|--------------------------------------|
| 1     | 2.5                         | 5                | 76                                  | 2                                    |
| 2     | 5                           | 10               | 86                                  | 3                                    |
| 3     | 7.5                         | 15               | 84                                  | 8                                    |
| 4     | 10                          | 20               | 89                                  | 6                                    |

[a] Yields determined by GC-FID analysis using mesitylene as an internal standard.

**Table S6. Optimization of base for C(sp<sup>2</sup>)-C(sp<sup>2</sup>) cross-coupling**

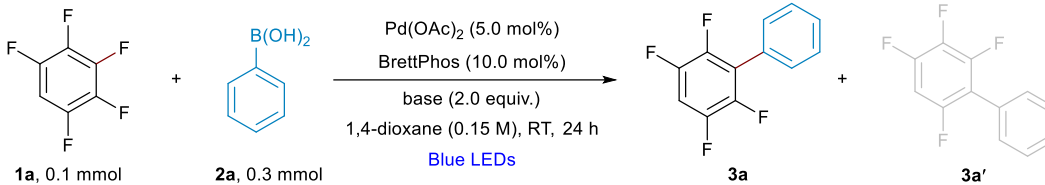

| Entry | base (2.0 equiv.)               | % Yield of <b>3a</b> <sup>[a]</sup> | % Yield of <b>3a'</b> <sup>[a]</sup> |
|-------|---------------------------------|-------------------------------------|--------------------------------------|
| 1     | CsF                             | 84                                  | 8                                    |
| 2     | CsOAc                           | 63                                  | 6                                    |
| 3     | CsHCO <sub>3</sub>              | np                                  | np                                   |
| 4     | K <sub>3</sub> PO <sub>4</sub>  | 15                                  | trace                                |
| 5     | KF                              | np                                  | np                                   |
| 6     | Na <sub>2</sub> CO <sub>3</sub> | np                                  | np                                   |
| 7     | K <sub>2</sub> CO <sub>3</sub>  | 80                                  | 8                                    |
| 8     | KOtBu                           | 14                                  | trace                                |
| 9     | DABCO                           | 75                                  | 5                                    |
| 10    | Piperidine                      | np                                  | np                                   |
| 11    | Bu <sub>3</sub> N               | 19                                  | trace                                |
| 12    | DIPEA                           | 24                                  | trace                                |
| 13    | Quinuclidine                    | 72                                  | 6                                    |
| 14    | N-Methylpiperidine              | 72                                  | 6                                    |

[a] Yields determined by GC-FID analysis using mesitylene as an internal standard. np = no product observed.

**Table S7. Optimization of reaction time for C(sp<sup>2</sup>)-C(sp<sup>2</sup>) cross-coupling**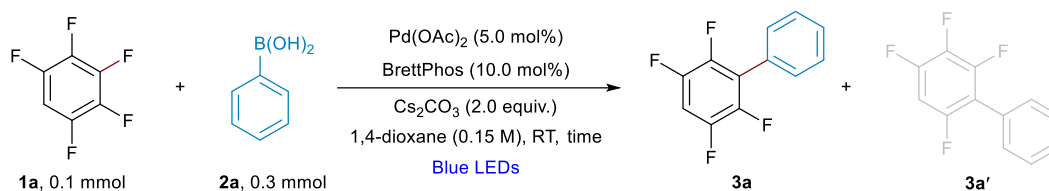

| Entry | Time (h) | % Yield of <b>3a</b> <sup>[a]</sup> | % Yield of <b>3a'</b> <sup>[a]</sup> |
|-------|----------|-------------------------------------|--------------------------------------|
| 1     | 18       | 89                                  | 6                                    |
| 2     | 12       | 85                                  | 10                                   |
| 3     | 6        | 88(78)                              | 5(3)                                 |
| 4     | 4        | 81                                  | 8                                    |

[a] Yields determined by GC-FID analysis using mesitylene as an internal standard. Yield with parenthesis is that of the isolated product.

**Table S8. Control experiment for C(sp<sup>2</sup>)-C(sp<sup>2</sup>) cross-coupling**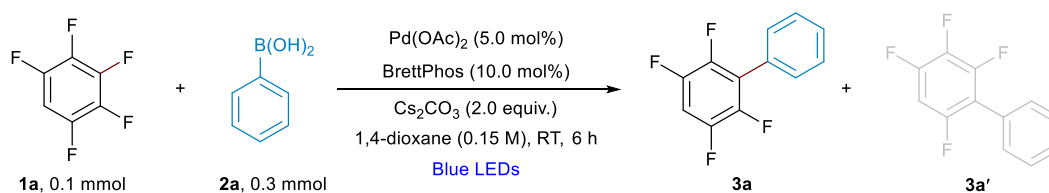

| Entry | Condition                           | % Yield of <b>3a</b> <sup>[a]</sup> | % Yield of <b>3a'</b> <sup>[a]</sup> |
|-------|-------------------------------------|-------------------------------------|--------------------------------------|
| 1     | under dark at 40 °C                 | 17                                  | trace                                |
| 2     | w/o Pd(OAc) <sub>2</sub>            | np                                  | np                                   |
| 3     | w/o BrettPhos                       | np                                  | np                                   |
| 4     | w/o Cs <sub>2</sub> CO <sub>3</sub> | trace                               | trace                                |

[a] Yields determined by GC-FID analysis using mesitylene as an internal standard.

### 3. General Procedure

#### A. General Procedure for visible light induced Pd-catalyzed C(sp<sup>2</sup>)-C(sp<sup>2</sup>) cross-coupling:

A clean 4 mL screw cap glass reaction vial was charged with Pd(OAc)<sub>2</sub> (3.4 mg, 0.015 mmol, 5 mol%), BrettPhos (16.1 mg, 0.03 mmol, 10 mol%), aryl boronic acid (0.9 mmol, 3.0 equiv.) and then transferred into an argon-filled glove box. To that, Cs<sub>2</sub>CO<sub>3</sub> (195.5 mg, 0.6 mmol, 2.0 equiv.), and degassed 1,4-dioxane (2 mL) were then added followed by polyfluoroarene (0.3 mmol, 1.0 equiv.). The vial was then capped with Teflon septum, removed from the glove box, and irradiated using blue LEDs (34 W) while stirring at RT (under fan cooling) for 6 h. After 6 h, the reaction mixture was diluted with ethyl acetate (20 mL) and washed with water (20 mL). The combined organic layer was collected, dried over anhydrous Na<sub>2</sub>SO<sub>4</sub>, and concentrated under reduced pressure. The residue was purified by column chromatography using silica gel (~100-200 mesh size) and pet. ether or pet. ether/DCM or, pet. ether/ethyl acetate was used as the eluent.

#### 4. Characterization data of products

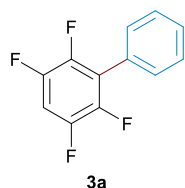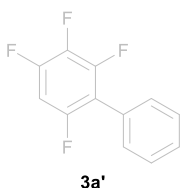

**2,3,5,6-tetrafluoro-1,1'-biphenyl (3a):** The title compound was prepared according to the general procedure-A from 1,2,3,4,5-pentafluorobenzene (50.4 mg, 0.3 mmol) and phenyl boronic acid (109.7 mg, 0.9 mmol). Pure **3a** was obtained with an inseparable regioisomeric mixture of **3a'** as an off-white solid (**3a**, 52.9 mg, 78% yield; **3a'**, 2.0 mg, 3% yield) after column chromatography of the crude reaction mixture (silica gel, gradient 100% pet. ether).

**<sup>1</sup>H NMR (400 MHz, CDCl<sub>3</sub>)** δ 7.54 – 7.42 (m, 5H), 7.07 (tt, *J* = 9.7, 7.3 Hz, 1H). **<sup>13</sup>C NMR (101 MHz, CDCl<sub>3</sub>)** δ 146.4 (dm, *J* = 244.2 Hz), 143.9 (dm, *J* = 247.2 Hz), 130.2, 129.3, 128.7, 127.6, 121.6 (t, *J* = 16.7 Hz), 105.0 (t, *J* = 22.8 Hz). **<sup>19</sup>F NMR (377 MHz, CDCl<sub>3</sub>)** δ -139.31 (dt, *J* = 22.0, 11.2 Hz, 2F), -143.96 (dt, *J* = 19.0, 9.7 Hz, 2F). The data are in accordance with those reported in the literature.<sup>1</sup>

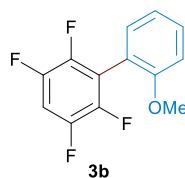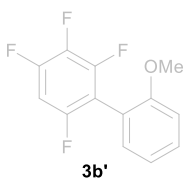

**2,3,5,6-tetrafluoro-2'-methoxy-1,1'-biphenyl (3b):** The title compound was prepared according to the general procedure-A from 1,2,3,4,5-pentafluorobenzene (50.4 mg, 0.3 mmol) and (2-methoxyphenyl)boronic acid (136.8 mg, 0.9 mmol). Pure **3b** was obtained with an inseparable regioisomeric mixture of **3b'** as an off-white solid (**3b**, 33.8 mg, 44% yield; **3b'**, 1.5 mg, 2% yield) after column chromatography of the crude reaction mixture (silica gel, gradient 100% pet. ether).

**<sup>1</sup>H NMR (400 MHz, CDCl<sub>3</sub>)** δ 7.49 – 7.43 (m, 1H), 7.28 – 7.25 (m, 1H), 7.12 – 7.01 (m, 3H), 3.83 (s, 3H). **<sup>13</sup>C NMR (101 MHz, CDCl<sub>3</sub>)** δ 157.2, 146.0 (dm, *J* = 246.9 Hz), 144.2 (dm, *J* = 247.1 Hz), 131.7, 131.1, 120.7, 118.6 (t, *J* = 18.8 Hz), 116.5, 111.4, 105.0 (t, *J* = 22.7 Hz), 55.8. **<sup>19</sup>F NMR (377 MHz, CDCl<sub>3</sub>)** δ -140.0 – -140.2 (m, 2F), -140.8 – -141.0 (m, 2F). The data are in accordance with those reported in the literature.<sup>2</sup>

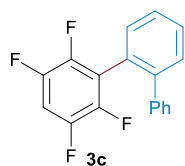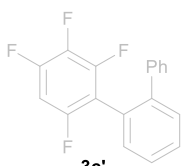

**2,3,5,6-tetrafluoro-1,1':2',1''-terphenyl (3c):** The title compound was prepared according to the general procedure-A from 1,2,3,4,5-pentafluorobenzene (50.4 mg, 0.3 mmol) and [1,1'-biphenyl]-2-ylboronic acid (178.2 mg, 0.9 mmol). Pure **3c** was obtained with an inseparable regioisomeric mixture of **3c'** as a white solid (**3c**, 80.6 mg, 89% yield; **3c'**, 2.7 mg, 3% yield) after column chromatography of the crude reaction mixture (silica gel, gradient 100% pet. ether).

**<sup>1</sup>H NMR (400 MHz, CDCl<sub>3</sub>)** δ 7.60 – 7.45 (m, 3H), 7.41 – 7.36 (m, 1H), 7.30 – 7.23 (m, 3H), 7.22 – 7.15 (m, 2H), 6.96 (tt, *J* = 9.6, 7.3 Hz, 1H). **<sup>13</sup>C NMR (101 MHz, CDCl<sub>3</sub>)** δ 145.8 (dm, *J* = 248.4 Hz), 143.8 (dm, *J* = 246.7 Hz), 143.0, 140.6, 131.1, 130.4, 129.7, 128.7, 128.2, 127.5, 127.4, 126.1, 121.8 (t, *J* = 18.7 Hz), 105.2 (t, *J* = 22.7 Hz). **<sup>19</sup>F NMR (377 MHz, CDCl<sub>3</sub>)** δ -139.4 – -

139.6 (m, 2F), -140.8 – -141.0 (m, 2F). The data are in accordance with those reported in the literature.<sup>1</sup>

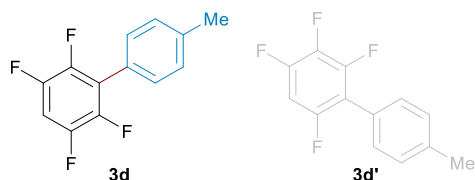

**2,3,5,6-tetrafluoro-4'-methyl-1,1'-biphenyl (3d):** The title compound was prepared according to the general procedure-A from 1,2,3,4,5-pentafluorobenzene (50.4 mg, 0.3 mmol) and *p*-tolylboronic acid (122.4 mg, 0.9 mmol).

Pure **3d** was obtained with an inseparable regioisomeric mixture of **3d'** as a white solid (**3d**, 55.4 mg, 77% yield; **3d'**, 2.2 mg, 3% yield) after column chromatography of the crude reaction mixture (silica gel, gradient 100% pet. ether).

<sup>1</sup>H NMR (400 MHz, CDCl<sub>3</sub>) δ 7.38 (d, *J* = 8.1 Hz, 2H), 7.33 (d, *J* = 8.1 Hz, 2H), 7.10 – 7.00 (m, 1H), 2.44 (s, 3H). <sup>13</sup>C NMR (101 MHz, CDCl<sub>3</sub>) δ 146.3 (dm, *J* = 248.4 Hz), 143.9 (dm, *J* = 246.5 Hz), 139.4, 130.1, 129.5, 124.6, 121.7 (t, *J* = 16.7 Hz), 104.6 (t, *J* = 22.8 Hz), 21.5. <sup>19</sup>F NMR (377 MHz, CDCl<sub>3</sub>) δ -139.3 – -139.5 (m, 2F), -143.9 – -144.2 (m, 2F). The data are in accordance with those reported in the literature.<sup>3</sup>

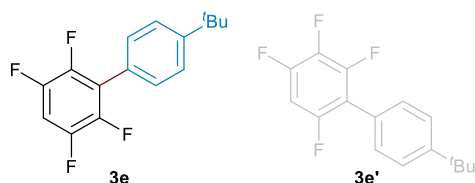

**4'-(tert-butyl)-2,3,5,6-tetrafluoro-1,1'-biphenyl (3e):**

The title compound was prepared according to the general procedure-A from 1,2,3,4,5-pentafluorobenzene (50.4 mg, 0.3 mmol) and (4-(*tert*-butyl)phenyl)boronic acid (160.2 mg, 0.9 mmol). Pure **3e** was obtained with an inseparable

regioisomeric mixture of **3e'** as a white solid (**3e**, 79.6 mg, 94% yield; **3e'**, 2.5 mg, 3% yield) after column chromatography of the crude reaction mixture (silica gel, gradient 100% pet. ether).

<sup>1</sup>H NMR (400 MHz, CDCl<sub>3</sub>) δ 7.62 – 7.50 (m, 2H), 7.49 – 7.37 (m, 2H), 7.06 (tt, *J* = 9.6, 7.3 Hz, 1H), 1.41 (s, 9H). <sup>13</sup>C NMR (101 MHz, CDCl<sub>3</sub>) δ 152.5, 147.6 (ddd, *J* = 14.8, 10.6, 4.0 Hz), 145.2 (tt, *J* = 10.4, 4.9 Hz), 142.7 (dt, *J* = 13.8, 4.3 Hz), 129.9, 125.7, 121.6 (t, *J* = 16.5 Hz), 104.6 (t, *J* = 22.7 Hz), 34.9, 31.4. <sup>19</sup>F NMR (377 MHz, CDCl<sub>3</sub>) δ -139.3 – -139.5 (m, 2F), -143.9 – -144.2 (m, 2F). The data are in accordance with those reported in the literature.<sup>1</sup>

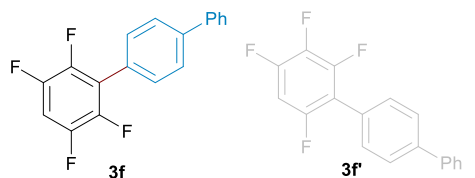

**2,3,5,6-tetrafluoro-1,1':4',1''-terphenyl (3f):** The title compound was prepared according to the general procedure-A from 1,2,3,4,5-pentafluorobenzene (50.4 mg, 0.3 mmol) and [1,1'-biphenyl]-4-ylboronic acid (178.2 mg, 0.9 mmol). Pure **3f** was obtained with an inseparable

regioisomeric mixture of **3f'** as a white solid (**3f**, 55.3 mg, 61% yield; **3f'**, 2.7 mg, 3% yield) after column chromatography of the crude reaction mixture (silica gel, gradient 100% pet. ether).

<sup>1</sup>H NMR (400 MHz, CDCl<sub>3</sub>) δ 7.76 (d, *J* = 8.3 Hz, 2H), 7.68 (d, *J* = 7.3 Hz, 2H), 7.56 (d, *J* = 8.3 Hz, 2H), 7.49 (t, *J* = 7.6 Hz, 2H), 7.40 (t, *J* = 7.3 Hz, 1H), 7.14 (tt, *J* = 9.8, 7.4 Hz, 1H). <sup>13</sup>C NMR (101 MHz, CDCl<sub>3</sub>) δ 146.9 (dm, *J* = 247.6 Hz), 144.4 (dm, *J* = 251.3 Hz), 142.6, 140.7, 131.1,

129.5, 128.4, 127.8, 127.7, 126.9, 121.6 (t,  $J = 16.7$  Hz), 105.5 (t,  $J = 22.9$  Hz).  $^{19}\text{F}$  NMR (377 MHz,  $\text{CDCl}_3$ )  $\delta$  -139.8 – -140.0 (m, 2F), -144.4 – -144.7 (m, 2F). The data are in accordance with those reported in the literature.<sup>4</sup>

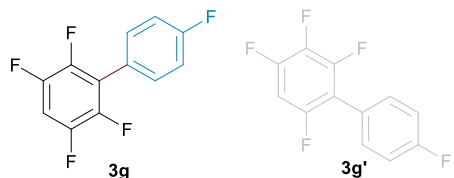

**2,3,4',5,6-pentafluoro-1,1'-biphenyl (3g):** The title compound was prepared according to the general procedure-A from 1,2,3,4,5-pentafluorobenzene (50.4 mg, 0.3 mmol) and (4-fluorophenyl)boronic acid (125.9 mg, 0.9 mmol). Pure **3g** was obtained with an inseparable regioisomeric mixture of **3g'** as a white solid (**3g**, 43.9 mg, 60% yield; **3g'**, 2.9 mg, 4% yield) after column chromatography of the crude reaction mixture (silica gel, gradient 100% pet. ether).

$^1\text{H}$  NMR (400 MHz,  $\text{CDCl}_3$ )  $\delta$  7.51 – 7.40 (m, 2H), 7.19 (t,  $J = 8.7$  Hz, 2H), 7.07 (ddd,  $J = 17.0$ , 9.6, 7.4 Hz, 1H).  $^{13}\text{C}$  NMR (101 MHz,  $\text{CDCl}_3$ )  $\delta$  163.3 (d,  $J = 249.6$ , Hz), 147.6 – 147.3 (m), 145.2 – 144.9 (m), 142.6 – 142.4 (m), 132.17 (d,  $J = 8.5$  Hz), 123.46, 120.65, 115.98 (d,  $J = 21.9$  Hz), 105.15 (t,  $J = 22.7$  Hz).  $^{19}\text{F}$  NMR (377 MHz,  $\text{CDCl}_3$ )  $\delta$  -111.4 – -111.6 (m, 1F), -138.9 – -139.0 (m, 2F), -143.9 – -144.1 (m, 2F). The data are in accordance with those reported in the literature.<sup>1</sup>

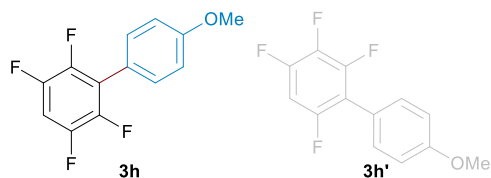

**2,3,5,6-tetrafluoro-4'-methoxy-1,1'-biphenyl (3h):** The title compound was prepared according to the general procedure-A from 1,2,3,4,5-pentafluorobenzene (50.4 mg, 0.3 mmol) and (4-methoxyphenyl)boronic acid (136.8 mg, 0.9 mmol). Pure **3h** was obtained with an inseparable regioisomeric mixture of **3h'** as an off-white solid (**3h**, 59.2 mg, 77% yield; **3h'**, 2.3 mg, 3% yield) after column chromatography of the crude reaction mixture (silica gel, gradient 100% pet. ether).

$^1\text{H}$  NMR (400 MHz,  $\text{CDCl}_3$ )  $\delta$  7.41 (d,  $J = 8.8$  Hz, 2H), 7.08 – 6.98 (m, 3H), 3.87 (s, 3H).  $^{13}\text{C}$  NMR (101 MHz,  $\text{CDCl}_3$ )  $\delta$  160.3, 146.4 (dm,  $J = 243.9$  Hz), 143.9 (dm,  $J = 246.2$  Hz), 131.5, 121.3 (t,  $J = 16.7$  Hz), 119.6, 114.2, 104.4 (t,  $J = 22.8$  Hz), 55.4.  $^{19}\text{F}$  NMR (377 MHz,  $\text{CDCl}_3$ )  $\delta$  -139.4 – -139.5 (m, 2F), -144.2 – -144.5 (m, 2F). The data are in accordance with those reported in the literature.<sup>1</sup>

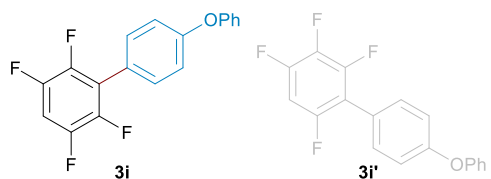

**2,3,5,6-tetrafluoro-4'-phenoxy-1,1'-biphenyl (3i):** The title compound was prepared according to the general procedure-A from 1,2,3,4,5-pentafluorobenzene (50.4 mg, 0.3 mmol) and (4-phenoxyphenyl)boronic acid (192.6 mg, 0.9 mmol). Pure **3i** was obtained with an inseparable regioisomeric mixture of **3i'** as a white solid (**3i**, 58.2 mg, 61% yield; **3i'**, 2.9 mg, 3% yield) after column chromatography of the crude reaction mixture (silica gel, gradient 100% pet. ether).

**<sup>1</sup>H NMR (400 MHz, CDCl<sub>3</sub>)** δ 7.47 – 7.37 (m, 4H), 7.19 (t, *J* = 7.4 Hz, 1H), 7.14 – 7.09 (m, 4H), 7.09 – 7.00 (m, 1H). **<sup>13</sup>C NMR (101 MHz, CDCl<sub>3</sub>)** δ 158.6, 156.3, 146.4 (dm, *J* = 245.6 Hz), 143.9 (dm, *J* = 245.0 Hz), 131.8, 130.8, 124.2, 121.8, 121.1 (t, *J* = 16.5 Hz), 119.9, 118.3, 104.7 (t, *J* = 22.8 Hz). **<sup>19</sup>F NMR (377 MHz, CDCl<sub>3</sub>)** δ -139.0 – -139.2 (m, 2F), -144.0 – -144.2 (m, 2F).

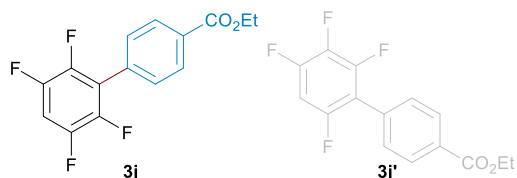

**ethyl 2',3',5',6'-tetrafluoro-[1,1'-biphenyl]-4-carboxylate (3j)**: The title compound was prepared according to the general procedure-A from 1,2,3,4,5-pentafluorobenzene (50.4 mg, 0.3 mmol) and (4-(ethoxycarbonyl)phenyl)boronic acid (174.6 mg, 0.9

mmol). Pure **3j** was obtained with an inseparable regioisomeric mixture of **3j'** as an off-white solid (**3j**, 67.1 mg, 75% yield; **3j'**, 2.7 mg, 3% yield) after column chromatography of the crude reaction mixture (silica gel, gradient 4% ethyl acetate/pet. ether).

**<sup>1</sup>H NMR (400 MHz, CDCl<sub>3</sub>)** δ 8.16 (d, *J* = 8.4 Hz, 2H), 7.54 (d, *J* = 8.4 Hz, 2H), 7.17 – 7.04 (m, 1H), 4.41 (q, *J* = 7.1 Hz, 2H), 1.41 (t, *J* = 7.1 Hz, 3H). **<sup>13</sup>C NMR (101 MHz, CDCl<sub>3</sub>)** δ 166.1, 146.3 (dm, *J* = 249.2 Hz), 143.7 (dm, *J* = 247.8 Hz), 132.0, 131.2, 130.3, 129.8, 120.6 (t, *J* = 16.5 Hz), 105.7 (t, *J* = 22.7 Hz), 61.4, 14.4. **<sup>19</sup>F NMR (377 MHz, CDCl<sub>3</sub>)** δ -138.5 – -138.8 (m, 2F), -143.4 – -143.6 (m, 2F). The data are in accordance with those reported in the literature.<sup>1</sup>

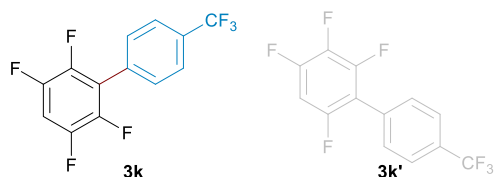

**2,3,5,6-tetrafluoro-4'-(trifluoromethyl)-1,1'-biphenyl (3k)**: The title compound was prepared according to the general procedure-A from 1,2,3,4,5-pentafluorobenzene (50.4 mg, 0.3 mmol) and (4-(trifluoromethyl)phenyl)boronic acid (170.9 mg, 0.9

mmol). Pure **3k** was obtained with an inseparable regioisomeric mixture of **3k'** as an off-white solid (**3k**, 82.0 mg, 93% yield; **3k'**, 2.6 mg, 3% yield) after column chromatography of the crude reaction mixture (silica gel, gradient 100% pet. ether).

**<sup>1</sup>H NMR (400 MHz, CDCl<sub>3</sub>)** δ 7.77 (d, *J* = 8.1 Hz, 2H), 7.60 (d, *J* = 8.0 Hz, 2H), 7.13 (ddd, *J* = 16.9, 9.5, 7.4 Hz, 1H). **<sup>13</sup>C NMR (101 MHz, CDCl<sub>3</sub>)** δ 146.3 (dm, *J* = 249.0 Hz), 143.7 (dm, *J* = 248.8 Hz), 131.7, 131.3, 130.8 (t, *J* = 2.2 Hz), 126.2 – 126.1 (m), 124.0 (q, *J* = 272.4 Hz), 120.3 (t, *J* = 16.7 Hz), 105.9 (t, *J* = 22.7 Hz). **<sup>19</sup>F NMR (377 MHz, CDCl<sub>3</sub>)** δ -63.0 (s, 3F), -138.4 – -138.5 (m, 2F), -143.6 – -143.8 (m, 2F). The data are in accordance with those reported in the literature.<sup>1</sup>

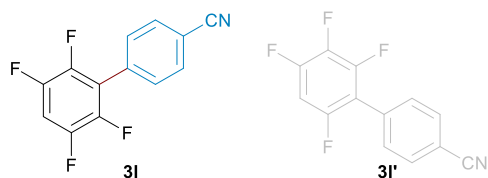

**2',3',5',6'-tetrafluoro-[1,1'-biphenyl]-4-carbonitrile (3l)**: The title compound was prepared according to the general procedure-A from 1,2,3,4,5-pentafluorobenzene (50.4 mg, 0.3 mmol) and (4-cyanophenyl)boronic acid (132.2 mg, 0.9 mmol). Pure **3l** was obtained with an

inseparable regioisomeric mixture of **3l'** as an off-white solid (**3l**, 71.6 mg, 95% yield; **3l'**, 1.5 mg, 2% yield) after column chromatography of the crude reaction mixture (silica gel, gradient 5% ethyl acetate/pet. ether).

**<sup>1</sup>H NMR (400 MHz, CDCl<sub>3</sub>)** δ 7.79 (d, *J* = 8.3 Hz, 2H), 7.59 (d, *J* = 8.2 Hz, 2H), 7.15 (ddd, *J* = 16.9, 9.5, 7.4 Hz, 1H). **<sup>13</sup>C NMR (101 MHz, CDCl<sub>3</sub>)** δ 147.6 – 142.4 (m, 2C), 132.5, 132.3, 131.1 (t, *J* = 2.2 Hz), 119.7 (t, *J* = 15.8 Hz), 118.3, 113.3, 106.3 (t, *J* = 22.7 Hz). **<sup>19</sup>F NMR (377 MHz, CDCl<sub>3</sub>)** δ -137.9 – -138.0 (m, 2F), -143.4 – -143.5 (m, 2F). The data are in accordance with those reported in the literature.<sup>5</sup>

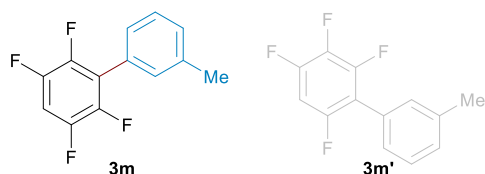

**2,3,5,6-tetrafluoro-3'-methyl-1,1'-biphenyl (**3m**):** The title compound was prepared according to the general procedure-A from 1,2,3,4,5-pentafluorobenzene (50.4 mg, 0.3 mmol) and *m*-tolylboronic acid (122.4 mg, 0.9 mmol). Pure **3m** was obtained with an inseparable regioisomeric mixture of **3m'** as a white solid (**3m**, 57.6 mg, 80% yield; **3m'**, 3.6 mg, 5% yield) after column chromatography of the crude reaction mixture (silica gel, gradient 100% pet. ether).

**<sup>1</sup>H NMR (400 MHz, CDCl<sub>3</sub>)** δ 7.42 – 7.34 (m, 1H), 7.31 – 7.23 (m, 3H), 7.11 – 7.01 (m, 1H), 2.43 (s, 3H). **<sup>13</sup>C NMR (101 MHz, CDCl<sub>3</sub>)** δ 146.3 (dm, *J* = 248.7 Hz), 143.9 (dm, *J* = 243.2 Hz), 138.5, 130.8, 130.1, 128.6, 127.5, 127.3, 121.8 (t, *J* = 16.9 Hz), 104.8 (t, *J* = 22.7 Hz), 21.6. **<sup>19</sup>F NMR (377 MHz, CDCl<sub>3</sub>)** δ -139.2 – -139.4 (m, 2F), -143.7 – -143.9 (m, 2F). The data are in accordance with those reported in the literature.<sup>6</sup>

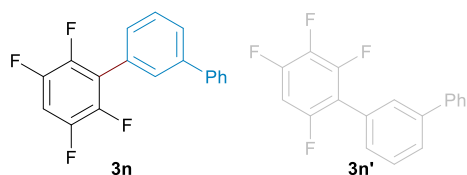

**2,3,5,6-tetrafluoro-1,1':3',1''-terphenyl (**3n**):** The title compound was prepared according to the general procedure-A from 1,2,3,4,5-pentafluorobenzene (50.4 mg, 0.3 mmol) and [1,1'-biphenyl]-3-ylboronic acid (178.2 mg, 0.9 mmol). Pure **3n** was obtained with an inseparable regioisomeric mixture of **3n'** as a white solid (**3n**, 60.7 mg, 67% yield; **3n'**, 2.7 mg, 3% yield) after column chromatography of the crude reaction mixture (silica gel, gradient 100% pet. ether).

**<sup>1</sup>H NMR (400 MHz, CDCl<sub>3</sub>)** δ 7.71 (d, *J* = 6.7 Hz, 2H), 7.68 – 7.63 (m, 2H), 7.60 (t, *J* = 8.0 Hz, 1H), 7.53 – 7.42 (m, 3H), 7.41 (t, *J* = 7.3 Hz, 1H), 7.11 (tt, *J* = 9.7 Hz, 7.3 Hz, 1H). **<sup>13</sup>C NMR (101 MHz, CDCl<sub>3</sub>)** δ 146.4 (dm, *J* = 248.9 Hz), 143.9 (dm, *J* = 243.8 Hz), 141.9, 140.5, 129.2, 129.9, 129.0, 128.11, 128.05, 127.8, 127.4, 121.5 (t, *J* = 16.8 Hz), 105.1 (t, *J* = 22.8 Hz). **<sup>19</sup>F NMR (377 MHz, CDCl<sub>3</sub>)** δ -138.8 – -139.1 (m, 2F), -143.5 – -143.7 (m, 2F).

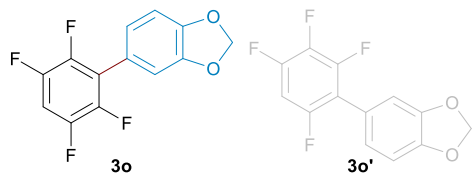

**5-(2,3,5,6-tetrafluorophenyl)benzo[d][1,3]dioxole (3o):**

The title compound was prepared according to the general procedure-A from 1,2,3,4,5-pentafluorobenzene (50.4 mg, 0.3 mmol) and benzo[d][1,3]dioxol-5-ylboronic acid (149.3 mg, 0.9 mmol). Pure **3o** was obtained with an inseparable regioisomeric mixture of **3o'** as an off-white solid (**3o**, 66.4 mg, 82% yield; **3o'**, 4.0 mg, 5% yield) after column chromatography of the crude reaction mixture (silica gel, gradient 100% pet. ether).

<sup>1</sup>H NMR (400 MHz, CDCl<sub>3</sub>) δ 7.11 – 7.01 (m, 1H), 7.00 – 6.89 (m, 3H), 6.06 (s, 2H). <sup>13</sup>C NMR (101 MHz, CDCl<sub>3</sub>) δ 148.5, 148.0, 146.3 (dm, *J* = 248.4 Hz), 143.9 (dm, *J* = 242.1 Hz), 124.3, 121.3 (t, *J* = 16.5 Hz), 120.7, 110.5, 108.7, 104.7 (t, *J* = 22.8 Hz), 101.6. <sup>19</sup>F NMR (377 MHz, CDCl<sub>3</sub>) δ -139.1 – -139.3 (m, 2F), -143.8 – -144.0 (m, 2F). The data are in accordance with those reported in the literature.<sup>5</sup>

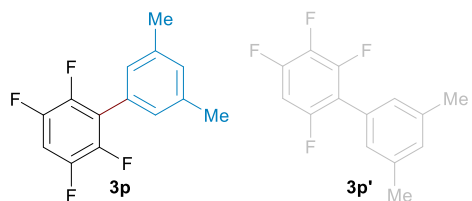

**2,3,5,6-tetrafluoro-3',5'-dimethyl-1,1'-biphenyl (3p):**

The title compound was prepared according to the general procedure-A from 1,2,3,4,5-pentafluorobenzene (50.4 mg, 0.3 mmol) and (3,5-dimethylphenyl)boronic acid (135.0 mg, 0.9 mmol). Pure **3p** was obtained with an inseparable regioisomeric mixture of **3p'** as an off-white solid (**3p**, 58.7 mg, 77% yield; **3p'**, 2.3 mg, 3% yield) after column chromatography of the crude reaction mixture (silica gel, gradient 100% pet. ether).

<sup>1</sup>H NMR (400 MHz, CDCl<sub>3</sub>) δ 7.11 (s, 1H), 7.07 (s, 2H), 7.09 – 7.00 (m, 1H), 2.39 (s, 6H). <sup>13</sup>C NMR (101 MHz, CDCl<sub>3</sub>) δ 146.3 (dm, *J* = 248.6 Hz), 143.5 (dm, *J* = 247.6 Hz), 138.3, 131.0, 127.9, 127.3, 122.0 (t, *J* = 17.1 Hz), 104.7 (t, *J* = 22.8 Hz), 21.4. <sup>19</sup>F NMR (377 MHz, CDCl<sub>3</sub>) -139.3 – -139.5 (m, 2F), -143.5 – -143.7 (m, 2F). The data are in accordance with those reported in the literature.<sup>1</sup>

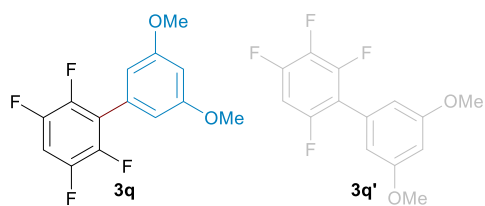

**2,3,5,6-tetrafluoro-3',5'-dimethoxy-1,1'-biphenyl (3q):**

The title compound was prepared according to the general procedure-A from 1,2,3,4,5-pentafluorobenzene (50.4 mg, 0.3 mmol) and (3,5-dimethoxyphenyl)boronic acid (163.8 mg, 0.9 mmol). Pure **3q** was obtained with an inseparable regioisomeric mixture of **3q'** as a pale yellow solid (**3q**, 74.7 mg, 87% yield; **3q'**, 2.6 mg, 3% yield) after column chromatography of the crude reaction mixture (silica gel, gradient 10% DCM/pet. ether).

<sup>1</sup>H NMR (400 MHz, CDCl<sub>3</sub>) δ 7.06 (tt, *J* = 9.7, 7.3 Hz, 1H), 6.60 – 6.53 (m, 3H), 3.83 (s, 6H). <sup>13</sup>C NMR (101 MHz, CDCl<sub>3</sub>) δ 160.9, 146.3 (dm, *J* = 248.7 Hz), 143.9 (dm, *J* = 240.0 Hz), 129.1, 121.6 (t, *J* = 16.8 Hz), 108.3, 105.0 (t, *J* = 22.7 Hz), 101.4, 55.6. <sup>19</sup>F NMR (377 MHz, CDCl<sub>3</sub>) δ -139.0 – -139.2 (m, 2F), -142.9 – -143.2 (m, 2F).

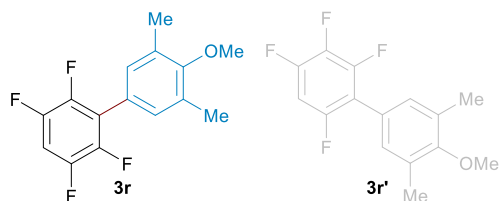

**2,3,5,6-tetrafluoro-4'-methoxy-3',5'-dimethyl-1,1'-biphenyl (3r):** The title compound was prepared according to the general procedure-A from 1,2,3,4,5-pentafluorobenzene (50.4 mg, 0.3 mmol) and (4-methoxy-3,5-dimethylphenyl)boronic acid (162.0 mg,

0.9 mmol). Pure **3r** was obtained with an inseparable regioisomeric mixture of **3r'** as a white solid (**3r**, 51.1 mg, 60% yield; **3r'**, 4.3 mg, 5% yield) after column chromatography of the crude reaction mixture (silica gel, gradient 15% DCM/pet. ether).

**<sup>1</sup>H NMR (400 MHz, CDCl<sub>3</sub>)** δ 7.11 (s, 2H), 7.02 (tt, *J* = 9.7, 7.3 Hz, 1H), 3.79 (s, 3H), 2.35 (s, 6H). **<sup>13</sup>C NMR (101 MHz, CDCl<sub>3</sub>)** δ 157.8, 146.3 (dm, *J* = 248.4 Hz), 143.8 (dm, *J* = 243.2 Hz), 131.5, 130.7, 122.8, 121.5 (t, *J* = 16.8 Hz), 104.5 (t, *J* = 22.7 Hz), 59.8, 16.3. **<sup>19</sup>F NMR (377 MHz, CDCl<sub>3</sub>)** δ -139.3 – -139.6 (m, 2F), -143.7 – -144.0 (m, 2F).

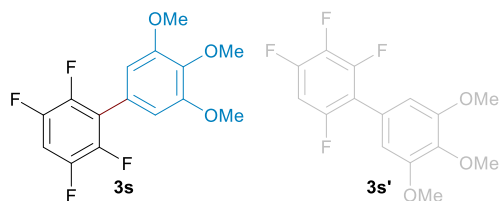

**2,3,5,6-tetrafluoro-3',4',5'-trimethoxy-1,1'-biphenyl (3s):** The title compound was prepared according to the general procedure-A from 1,2,3,4,5-pentafluorobenzene (50.4 mg, 0.3 mmol) and (3,4,5-trimethoxyphenyl)boronic acid (190.8 mg, 0.9 mmol).

Pure **3s** was obtained with an inseparable regioisomeric mixture of **3s'** as a white solid (**3s**, 61.6 mg, 65%; **3s'**, 0.95 mg, 1% yield) after column chromatography of the crude reaction mixture (silica gel, gradient 15% DCM/pet. ether).

**<sup>1</sup>H NMR (400 MHz, CDCl<sub>3</sub>)** δ 7.05 (tt, *J* = 9.6 Hz, 7.3 Hz, 1H), 6.65 (s, 2H), 3.91 (s, 3H), 3.87 (s, 6H). **<sup>13</sup>C NMR (101 MHz, CDCl<sub>3</sub>)** δ 153.4, 146.3 (dm, *J* = 248.5 Hz), 143.8 (dm, *J* = 247.2 Hz), 138.8, 122.6, 121.5 (t, *J* = 16.6 Hz), 107.5, 104.8 (t, *J* = 22.7 Hz), 61.0, 56.3. **<sup>19</sup>F NMR (377 MHz, CDCl<sub>3</sub>)** δ -139.0 – -139.2 (m, 2F), -143.2 – -143.4 (m, 2F). The data are in accordance with those reported in the literature.<sup>7</sup>

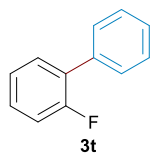

**2-fluoro-1,1'-biphenyl (3t):** The title compound was prepared according to the general procedure-A from 1,2-difluorobenzene (43.2 mg, 0.3 mmol) and phenylboronic acid (109.7 mg, 0.9 mmol). Pure **3t** was obtained as colorless liquid 43.7 mg, 67% yield after column chromatography of the crude reaction mixture (silica gel, gradient 100% pet. ether).

**<sup>1</sup>H NMR (400 MHz, CDCl<sub>3</sub>)** δ 7.72 – 7.51 (m, 2H), 7.50 – 7.28 (m, 5H), 7.24 – 7.12 (m, 2H). **<sup>13</sup>C NMR (101 MHz, CDCl<sub>3</sub>)** δ 161.0, 136.0, 130.9 (d, *J* = 3.1 Hz), 129.2 (d, *J* = 2.9 Hz), 128.6, 127.8, 124.3 (d, *J* = 4.0 Hz), 116.4, 116.1. **<sup>19</sup>F NMR (377 MHz, CDCl<sub>3</sub>)** δ -118.1. The data are in accordance with those reported in the literature.<sup>8</sup>

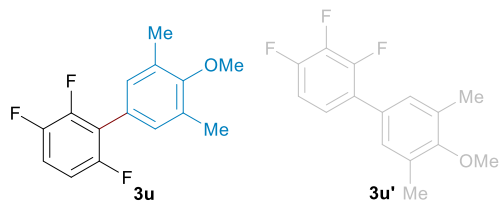

**2,3,6-trifluoro-4'-methoxy-3',5'-dimethyl-1,1'-biphenyl (3u):** The title compound was prepared according to the general procedure-A from 1,2,3,4-tetrafluorobenzene (45.0 mg, 0.3 mmol) and (4-methoxy-3,5-dimethylphenyl)boronic acid (162.0 mg, 0.9 mmol).

Pure **3u** was obtained with an inseparable regioisomeric mixture of **3u'** as pale-yellow liquid (**3u**, 35.9 mg, 45% yield; **3u'**, 4.0 mg, 5% yield) after column chromatography of the crude reaction mixture (silica gel, gradient 15% DCM/pet. ether).

$^1\text{H NMR}$  (400 MHz,  $\text{CDCl}_3$ )  $\delta$  7.15 – 7.04 (m, 3H), 6.89 (tdd,  $J = 9.1, 3.8, 2.2$  Hz, 1H), 3.79 (s, 3H), 2.35 (s, 6H).  $^{13}\text{C NMR}$  (101 MHz,  $\text{CDCl}_3$ ) 157.5, 155.4 (ddd,  $J = 244.3, 4.6, 2.5$  Hz), 148.0 (ddd,  $J = 249.8, 14.2, 7.5$  Hz), 147.6 (ddd,  $J = 244.9, 13.8, 3.5$  Hz), 131.2, 130.7, 123.7, 120.3 (dd,  $J = 20.9, 15.3$  Hz), 115.3 (dd,  $J = 19.3, 10.0$  Hz), 110.9 (ddd,  $J = 25.7, 6.6, 4.3$  Hz), 59.8, 16.3.  $^{19}\text{F NMR}$  (377 MHz,  $\text{CDCl}_3$ )  $\delta$  -119.6 (s, 1F), -137.6 – -137.8 (m, 1F), -142.2 – -142.4 (m, 1F).

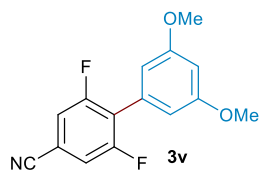

**2,6-difluoro-3',5'-dimethoxy-[1,1'-biphenyl]-4-carbonitrile (3v):** The title compound was prepared according to the general procedure-A from 3,4,5-trifluorobenzonitrile (47.1 mg, 0.3 mmol) and (3,5-dimethoxyphenyl)boronic acid (163.8 mg, 0.9 mmol). Pure **3v** was obtained

as an off-white solid 97% (80.0 mg) yield after column chromatography of the crude reaction mixture (silica gel, gradient 4% ethyl acetate/pet. ether).

$^1\text{H NMR}$  (400 MHz,  $\text{CDCl}_3$ )  $\delta$  7.59 – 7.13 (m, 2H), 6.56 (s, 3H), 3.82 (s, 6H).  $^{13}\text{C NMR}$  (101 MHz,  $\text{CDCl}_3$ )  $\delta$  160.0 (dd,  $J = 252.9, 7.7$  Hz), 160.9, 128.8, 124.3 (t,  $J = 18.7$  Hz), 116.7 (d,  $J = 3.5$  Hz), 116.3 – 115.4 (m), 112.5 (t,  $J = 12.1$  Hz), 108.3, 101.4, 55.6.  $^{19}\text{F NMR}$  (377 MHz,  $\text{CDCl}_3$ )  $\delta$  -109.12 – -109.50 (m, 2F).

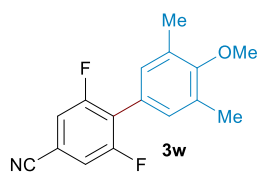

**2,6-difluoro-4'-methoxy-3',5'-dimethyl-[1,1'-biphenyl]-4-carbonitrile (3w):** The title compound was prepared according to the general procedure-A from 3,4,5-trifluorobenzonitrile (47.1 mg, 0.3 mmol) and (4-methoxy-3,5-dimethylphenyl)boronic acid (162.0 mg, 0.9 mmol). Pure **3w** was obtained

as an off-white solid 79% (64.7 mg) yield after column chromatography of the crude reaction mixture (silica gel, gradient 4% ethyl acetate/pet. ether).

$^1\text{H NMR}$  (400 MHz,  $\text{CDCl}_3$ )  $\delta$  7.32 – 7.24 (m, 2H), 7.11 (s, 2H), 3.78 (s, 3H), 2.34 (s, 6H).  $^{13}\text{C NMR}$  (101 MHz,  $\text{CDCl}_3$ )  $\delta$  160.0 (dd,  $J = 251.8, 7.9$  Hz), 158.0, 131.4, 130.6, 124.2 (t,  $J = 18.6$  Hz), 122.4, 116.8 (t,  $J = 3.3$  Hz), 116.1 – 115.6 (m), 111.8 (t,  $J = 12.2$  Hz), 59.8, 16.3.  $^{19}\text{F NMR}$  (377 MHz,  $\text{CDCl}_3$ )  $\delta$  -110.1 (s, 2F).

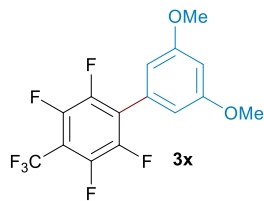

**2,3,5,6-tetrafluoro-3',5'-dimethoxy-4-(trifluoromethyl)-1,1'-biphenyl**

**(3x):** The title compound was prepared according to the general procedure-A from 1,2,3,4,5-pentafluoro-6-(trifluoromethyl)benzene (70.8 mg, 0.3 mmol) and (3,5-dimethoxyphenyl)boronic acid (163.8 mg, 0.9 mmol). Pure **3x** was obtained as an off-white solid 93% (98.8 mg) yield after column

chromatography of the crude reaction mixture (silica gel, gradient 10% DCM/pet. ether).

**<sup>1</sup>H NMR (400 MHz, CDCl<sub>3</sub>)** δ 6.58 (s, 3H), 3.83 (s, 6H). **<sup>13</sup>C NMR (101 MHz, CDCl<sub>3</sub>)** δ 161.1, 146.1 – 145.3 (m), 143.4 – 142.8 (m), 127.6, 125.1 (t, *J* = 16.2 Hz), 121.0 (d, *J* = 274.5 Hz), 108.2, 102.0, 55.6. **<sup>19</sup>F NMR (377 MHz, CDCl<sub>3</sub>)** δ -56.37 (t, *J* = 21.0 Hz, 3F), -140.82 (ddd, *J* = 54.1, 19.8, 11.9 Hz, 4F).

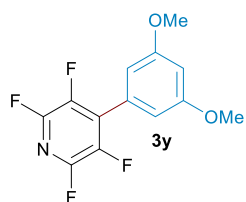

**2,3,5,6-tetrafluoro-4-(4-methoxy-3,5-dimethylphenyl)pyridine (3y):** The

title compound was prepared according to the general procedure-A from perfluoropyridine (50.7 mg, 0.3 mmol) and (3,5-dimethoxyphenyl)boronic acid (163.8 mg, 0.9 mmol). Pure **3y** was obtained as an off-white solid 71% (61.1 mg) yield after column chromatography of the crude reaction mixture

(silica gel, gradient 10% DCM/pet. ether).

**<sup>1</sup>H NMR (400 MHz, CDCl<sub>3</sub>)** δ 6.95 – 6.30 (m, 3H), 3.83 (s, 6H). **<sup>13</sup>C NMR (101 MHz, CDCl<sub>3</sub>)** δ 161.1, 146.1 – 142.5 (m), 141.5 – 137.8 (m), 133.6 (t, *J* = 14.8 Hz), 127.4, 107.9, 102.5, 55.6. **<sup>19</sup>F NMR (377 MHz, CDCl<sub>3</sub>)** δ -90.68 – -90.94 (m, 2F), -144.06 – -144.30 (m, 2F).

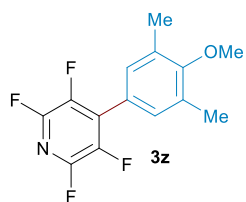

**2,3,5,6-tetrafluoro-4-(4-methoxy-3,5-dimethylphenyl)pyridine (3z):** The

title compound was prepared according to the general procedure-A from perfluoropyridine (50.7 mg, 0.3 mmol) and (4-methoxy-3,5-dimethylphenyl)boronic acid (162.0 mg, 0.9 mmol). Pure **3z** was obtained as an off-white solid 37% (31.7 mg) yield after column chromatography of the

crude reaction mixture (silica gel, gradient 10% DCM/pet. ether).

**<sup>1</sup>H NMR (400 MHz, CDCl<sub>3</sub>)** δ 7.19 (s, 2H), 3.80 (s, 3H), 2.36 (s, 6H). **<sup>13</sup>C NMR (101 MHz, CDCl<sub>3</sub>)** δ 159.0, 144.1 (dm, *J* = 245.4 Hz), 139.3 (dm, *J* = 258.7 Hz), 133.6 (t, *J* = 14.7 Hz), 132.0, 130.4, 121.3, 59.9, 16.3. **<sup>19</sup>F NMR (377 MHz, CDCl<sub>3</sub>)** δ -91.1 – -91.4 (m, 2F), -145.0 – -145.3 (m, 2F).

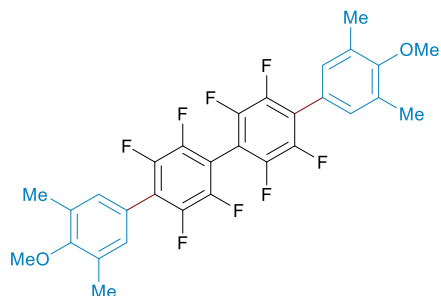

**2',2'',3',3'',5',5'',6',6''-octafluoro-4,4'''-dimethoxy-**

**3,3''',5,5'''-tetramethyl-1,1':4',1''':4'',1'''-quaterphenyl**

**(3aa):** The title compound was prepared according to the general procedure-A from perfluoro-1,1'-biphenyl (100.2 mg, 0.3 mmol) and (4-methoxy-3,5-dimethylphenyl)boronic acid (162.0 mg, 0.9 mmol). Pure **3aa** was obtained as a white solid

85% (144.4 mg) yield after column chromatography of the crude reaction mixture (silica gel, gradient 50% DCM/pet. ether).

$^1\text{H NMR}$  (400 MHz,  $\text{CDCl}_3$ )  $\delta$  7.22 (s, 4H), 3.82 (s, 6H), 2.39 (s, 12H).  $^{13}\text{C NMR}$  (101 MHz,  $\text{CDCl}_3$ ) 158.1, 144.3 (ddd,  $J = 54.4, 42.1, 14.0$  Hz), 131.6, 130.7, 127.5, 122.7 (t,  $J = 16.8$  Hz), 122.3, 105.7 (t,  $J = 15.8$  Hz), 59.8, 16.3.  $^{19}\text{F NMR}$  (377 MHz,  $\text{CDCl}_3$ )  $\delta$  -138.9 – -139.1 (m, 4F), -142.9 (d,  $J = 12.2$  Hz, 4F).

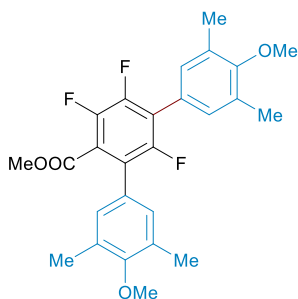

**methyl 2',5',6'-trifluoro-4,4''-dimethoxy-3,3'',5,5''-tetramethyl-[1,1':3',1''-terphenyl]-4'-carboxylate (3ab):** The title compound was prepared according to the general procedure-A from methyl 2,3,4,5,6-pentafluorobenzoate (67.8 mg, 0.3 mmol) and (4-methoxy-3,5-dimethylphenyl)boronic acid (162.0 mg, 0.9 mmol). Pure **3ab** was obtained as yellowish orange sticky liquid 76% (104.5 mg) yield after column chromatography of the crude reaction mixture (silica gel, gradient 80% DCM/pet. ether).

$^1\text{H NMR}$  (400 MHz,  $\text{CDCl}_3$ )  $\delta$  7.15 (s, 2H), 7.01 (s, 2H), 3.78 (s, 3H), 3.76 (s, 3H), 3.70 (s, 3H), 2.34 (s, 6H), 2.31 (s, 6H).  $^{13}\text{C NMR}$  (101 MHz,  $\text{CDCl}_3$ )  $\delta$  164.13, 157.7, 157.4, 151.9 (dm,  $J = 245.2$  Hz), 146.3 (ddd,  $J = 252.0, 14.0$  Hz, 7.0 Hz), 144.8 (ddd,  $J = 247.0, 15.3, 3.7$  Hz), 131.3, 131.0, 130.7, 129.9, 127.4, 124.1 (dd,  $J = 21.1, 3.3$  Hz), 123.1, 122.4 (dd,  $J = 14.7, 3.3$  Hz), 121.8 (dd,  $J = 22.4, 15.2$  Hz), 59.8, 52.8, 16.2, 16.2.  $^{19}\text{F NMR}$  (377 MHz,  $\text{CDCl}_3$ )  $\delta$  -119.9 (d,  $J = 14.7$  Hz, 1F), -137.8 (d,  $J = 22.6$  Hz, 1F), -143.8 (dd,  $J = 21.0, 15.6$  Hz, 1F).

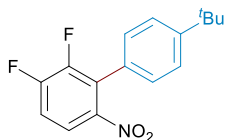

**4'-(tert-butyl)-2,3-difluoro-6-nitro-1,1'-biphenyl (4a):** The title compound was prepared according to the general procedure-A from 1,2,3-trifluoro-4-nitrobenzene (53.1 mg, 0.3 mmol) and ((4-(tert-butyl)phenyl)boronic acid (160.2 mg, 0.9 mmol). Pure **4a** was obtained as an off-white solid 97% yield (84.7 mg) after column chromatography of the crude reaction mixture (silica gel, gradient 4% DCM/pet. ether).

$^1\text{H NMR}$  (400 MHz,  $\text{CDCl}_3$ )  $\delta$  7.72 (ddd,  $J = 9.1, 4.4, 2.0$  Hz, 1H), 7.52 (d,  $J = 8.4$  Hz, 2H), 7.43 – 7.24 (m, 3H), 1.39 (s, 9H).  $^{13}\text{C NMR}$  (101 MHz,  $\text{CDCl}_3$ )  $\delta$  153.1 (dd,  $J = 258.5, 14.0$  Hz), 152.4, 151.9, 151.8, 148.1 (dd,  $J = 251.6, 13.5$  Hz), 145.8, 128.5, 127.9 (d,  $J = 16.7$  Hz), 126.2 (d,  $J = 1.6$  Hz), 125.9, 120.5 (dd,  $J = 7.9, 4.4$  Hz), 116.1 (d,  $J = 19.2$  Hz), 34.9, 31.3.  $^{19}\text{F NMR}$  (377 MHz,  $\text{CDCl}_3$ )  $\delta$  -127.95 (d,  $J = 21.9$  Hz, 1F), -132.67 – -135.32 (m, 1F).

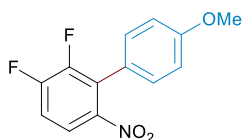

**2,3-difluoro-4'-methoxy-6-nitro-1,1'-biphenyl (4b):** The title compound was prepared according to the general procedure-A from 1,2,3-trifluoro-4-nitrobenzene (53.1 mg, 0.3 mmol) and (4-methoxyphenyl)boronic acid (136.8 mg, 0.9 mmol). Pure **4b** was obtained as a yellow solid 87% (69.2 mg)

yield after column chromatography of the crude reaction mixture (silica gel, gradient 4% DCM/pet. ether).

**<sup>1</sup>H NMR (400 MHz, CDCl<sub>3</sub>)** δ 7.72 (ddd, *J* = 9.1, 4.4, 2.0 Hz, 1H), 7.39 – 7.19 (m, 3H), 7.12 – 6.97 (m, 2H), 3.88 (s, 3H). **<sup>13</sup>C NMR (101 MHz, CDCl<sub>3</sub>)** δ 160.4, 153.1 (dd, *J* = 258.1, 14.2 Hz), 148.1 (dd, *J* = 251.0, 13.4 Hz), 145.8, 130.2, 127.6 (d, *J* = 16.9 Hz), 121.2 (d, *J* = 1.8 Hz), 120.5 (dd, *J* = 8.0, 4.5 Hz), 116.0 (d, *J* = 19.2 Hz), 114.4, 55.4. **<sup>19</sup>F NMR (377 MHz, CDCl<sub>3</sub>)** δ -127.20 – -128.77 (m, 1F), -134.96 (dd, *J* = 21.1, 5.6 Hz, 1F).

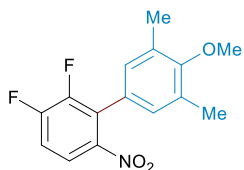

**2,3-difluoro-4'-methoxy-3',5'-dimethyl-6-nitro-1,1'-biphenyl (4c):** The title compound was prepared according to the general procedure-A from 1,2,3-trifluoro-4-nitrobenzene (53.1 mg, 0.3 mmol) and (4-methoxy-3,5-dimethylphenyl)boronic acid (162.0 mg, 0.9 mmol). Pure **4c** was obtained as a pale-yellow solid 84% (73.9 mg) yield after column chromatography of the crude reaction mixture (silica gel, gradient 4% ethyl acetate/pet. ether).

**<sup>1</sup>H NMR (400 MHz, CDCl<sub>3</sub>)** δ 7.69 (ddd, *J* = 9.1, 4.4, 2.0 Hz, 1H), 7.30 – 7.22 (m, 1H), 6.95 (s, 2H), 3.77 (s, 3H), 2.31 (s, 6H). **<sup>13</sup>C NMR (101 MHz, CDCl<sub>3</sub>)** δ 157.9, 153.1 (dd, *J* = 251.8, 14.2 Hz), 148.0 (dd, *J* = 251.2, 13.4 Hz), 145.7, 131.6, 129.2, 127.8 (d, *J* = 17.0 Hz), 124.5, 120.4 (dd, *J* = 8.0, 4.4 Hz), 116.0 (d, *J* = 19.2 Hz), 59.8, 16.2. **<sup>19</sup>F NMR (377 MHz, CDCl<sub>3</sub>)** δ -128.0 (d, *J* = 22.4 Hz, 1F), -134.6 (dd, *J* = 21.0, 5.9 Hz, 1F).

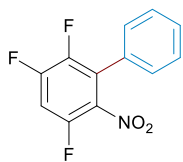

**2,3,5-trifluoro-6-nitro-1,1'-biphenyl (4d):** The title compound was prepared according to the general procedure-A from 1,2,3,5-tetrafluoro-4-nitrobenzene (58.5 mg, 0.3 mmol) and phenyl boronic acid (109.7 mg, 0.9 mmol). Pure **4d** was obtained as colorless liquid 51% (38.7 mg) yield after column chromatography of the crude reaction mixture (silica gel, gradient 10% DCM/pet. ether).

**<sup>1</sup>H NMR (400 MHz, CDCl<sub>3</sub>)** δ 7.55 – 7.45 (m, 3H), 7.43 – 7.32 (m, 2H), 7.17 (td, *J* = 9.1, 6.3 Hz, 1H). **<sup>13</sup>C NMR (101 MHz, CDCl<sub>3</sub>)** δ 151.6 (ddd, *J* = 258.7, 15.2, 11.7 Hz), 149.7 (ddd, *J* = 258.1, 11.2, 4.0 Hz), 144.2 (ddd, *J* = 250.1, 13.8, 3.8 Hz), 135.9 – 135.8 (m), 130.2, 129.2, 129.0, 127.8, 126.9 (d, *J* = 17.9 Hz), 105.9 (dd, *J* = 24.6, 22.7 Hz). **<sup>19</sup>F NMR (377 MHz, CDCl<sub>3</sub>)** δ -123.88 – -124.20 (m, 1F), -125.75 – -126.52 (m, 1F), -140.77 (ddd, *J* = 19.2, 13.8, 4.4 Hz, 1F). The data are in accordance with those reported in the literature.<sup>1,9</sup>

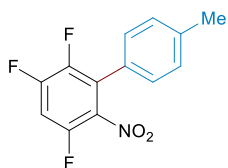

**2,3,5-trifluoro-4'-methyl-6-nitro-1,1'-biphenyl (4e):** The title compound was prepared according to the general procedure-A from 1,2,3,5-tetrafluoro-4-nitrobenzene (58.5 mg, 0.3 mmol) and *p*-tolylboronic acid (122.4 mg, 0.9 mmol). Pure **4e** was obtained as pale-yellow sticky liquid 53% (42.5 mg) yield after column chromatography of the crude reaction mixture (silica gel, gradient 10% ethyl acetate/pet. ether).

**<sup>1</sup>H NMR (400 MHz, CDCl<sub>3</sub>)** δ 7.33 – 7.20 (m, 4H), 7.14 (m, 1H), 2.41 (s, 3H). **<sup>13</sup>C NMR (101 MHz, CDCl<sub>3</sub>)** δ 151.5 (ddd, *J* = 259.0, 15.4, 11.5 Hz), 149.6 (ddd, *J* = 256.8, 11.3, 4.1 Hz), 144.1 (ddd, *J* = 247.6, 13.5, 4.2 Hz), 140.4, 136.0 – 135.7 (m), 129.9, 128.8, 127.0 (d, *J* = 18.3 Hz), 124.7, 105.6 (dd, *J* = 24.7, 22.7 Hz), 21.5. **<sup>19</sup>F NMR (377 MHz, CDCl<sub>3</sub>)** δ -123.59 – -125.11 (m, 1F), -125.49 – -127.62 (m, 1F), -140.63 – -141.64 (m, 1F). The data are in accordance with those reported in the literature.<sup>7</sup>

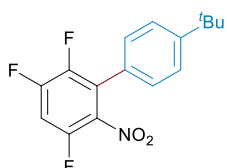

**4'-(*tert*-butyl)-2,3,5-trifluoro-6-nitro-1,1'-biphenyl (4f)**: The title compound was prepared according to the general procedure-A from 1,2,3,5-tetrafluoro-4-nitrobenzene (58.5 mg, 0.3 mmol) and ((4-(*tert*-butyl)phenyl)boronic acid (160.2 mg, 0.9 mmol). Pure **4f** was obtained as colorless sticky liquid 62% (57.5 mg) yield after column chromatography of the crude reaction mixture (silica gel, gradient 10% DCM/pet. ether).

**<sup>1</sup>H NMR (400 MHz, CDCl<sub>3</sub>)** δ 7.57 – 7.44 (m, 2H), 7.34 – 7.27 (m, 2H), 7.14 (td, *J* = 9.1, 6.2 Hz, 1H), 1.36 (s, 9H). **<sup>13</sup>C NMR (101 MHz, CDCl<sub>3</sub>)** δ 153.4, 151.6 (ddd, *J* = 258.5, 15.3, 12.0 Hz), 149.7 (ddd, *J* = 257.3, 11.4, 3.9 Hz), 144.307 (ddd, *J* = 249.7, 13.2, 3.9 Hz), 135.9 – 135.8 (m), 128.7, 127.0 (d, *J* = 18.6 Hz), 126.2, 124.7, 105.5 (dd, *J* = 24.6, 22.7 Hz), 35.0, 31.3. **<sup>19</sup>F NMR (377 MHz, CDCl<sub>3</sub>)** δ -119.99 – -125.04 (m, 1F), -125.42 – -129.46 (m, 1F), -136.28 – -146.26 (m, 1F).

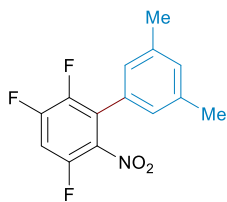

**2,3,5-trifluoro-3',5'-dimethyl-6-nitro-1,1'-biphenyl (4g)**: The title compound was prepared according to the general procedure-A from 1,2,3,5-tetrafluoro-4-nitrobenzene (58.5 mg, 0.3 mmol) and (3,5-dimethylphenyl)boronic acid (135.0 mg, 0.9 mmol). Pure **4g** was obtained as an off-white solid 57% (48.1 mg) yield after column chromatography of the crude reaction mixture (silica gel, gradient 5% DCM/pet. ether).

**<sup>1</sup>H NMR (400 MHz, CDCl<sub>3</sub>)** δ 7.19 – 7.08 (m, 2H), 7.00 – 6.91 (m, 2H), 2.35 (s, 3H). **<sup>13</sup>C NMR (101 MHz, CDCl<sub>3</sub>)** δ 151.6 (ddd, *J* = 258.8, 15.5, 11.7 Hz), 149.6 (ddd, *J* = 256.7, 11.0, 3.9 Hz), 144.1 (ddd, *J* = 249.3, 13.0, 4.1 Hz), 138.9, 136.0 – 135.7 (m), 131.9, 126.6, 127.0 (d, *J* = 18.3 Hz), 123.2, 105.5 (dd, *J* = 24.3, 23.6 Hz), 21.4. **<sup>19</sup>F NMR (377 MHz, CDCl<sub>3</sub>)** δ -116.42 – -125.47 (m, 1F), -125.47 – -127.73 (m, 1F), -140.65 (dt, *J* = 23.7, 11.2 Hz, 1F).

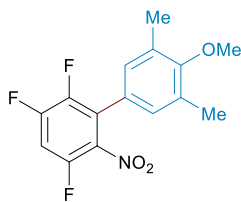

**2,3,5-trifluoro-4'-methoxy-3',5'-dimethyl-6-nitro-1,1'-biphenyl (4h)**: The title compound was prepared according to the general procedure-A from 1,2,3,5-tetrafluoro-4-nitrobenzene (58.5 mg, 0.3 mmol) and (4-methoxy-3,5-dimethylphenyl)boronic acid (162.0 mg, 0.9 mmol). Pure **4h** was obtained as pale yellow solid 54% (50.4 mg) yield after column chromatography of the crude reaction mixture (silica gel, gradient 20% DCM/pet. ether).

**<sup>1</sup>H NMR (400 MHz, CDCl<sub>3</sub>)** δ 7.12 (td, *J* = 9.1, 6.2 Hz, 1H), 6.99 (s, 2H), 3.76 (s, 3H), 2.30 (s, 6H). **<sup>13</sup>C NMR (101 MHz, CDCl<sub>3</sub>)** δ 158.5, 151.5 (ddd, *J* = 259.3, 15.3, 11.8 Hz), 149.6 (ddd, *J* = 257.9, 11.3, 4.0 Hz), 144.2 (ddd, *J* = 249.0, 13.3, 3.9 Hz), 136.0 – 135.5 (m), 132.0, 129.4, 126.8 (d, *J* = 18.0 Hz) 122.9, 105.4 (dd, *J* = 24.3, 23.0 Hz), 59.8, 16.3. **<sup>19</sup>F NMR (377 MHz, CDCl<sub>3</sub>)** δ -124.6 (s, 1F), -126.8 (d, *J* = 22.8 Hz, 1F), -140.7 – -140.9 (m, 1F).

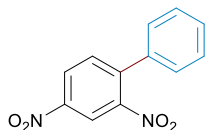

**2,4-dinitro-1,1'-biphenyl (4i)**: The title compound was prepared according to the general procedure-A from 1-fluoro-2,4-dinitrobenzene (56.4 mg, 0.3 mmol) phenylboronic acid (109.7 mg, 0.9 mmol). Pure **4i** was obtained as a yellow solid 25% (18.3 mg) yield after column chromatography of the crude reaction mixture (silica gel, gradient 9% ethyl acetate/pet. ether).

**<sup>1</sup>H NMR (500 MHz, CDCl<sub>3</sub>)** δ 8.71 (d, *J* = 2.3 Hz, 1H), 8.47 (dd, *J* = 8.5, 2.3 Hz, 1H), 7.68 (d, *J* = 8.5 Hz, 1H), 7.56 – 7.45 (m, 3H), 7.41 – 7.30 (m, 2H). **<sup>13</sup>C NMR (126 MHz, CDCl<sub>3</sub>)** δ 149.3, 147.0, 142.4, 135.4, 133.4, 129.7, 129.3, 127.8, 126.6, 119.9. The data are in accordance with those reported in the literature.<sup>10</sup>

## 5. Mechanistic Investigation

### Radical quenching experiment

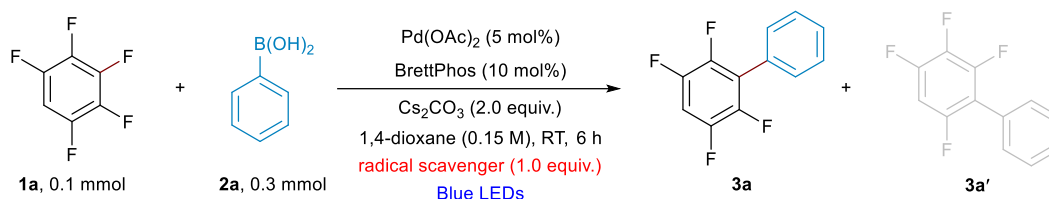

A clean 2 mL screw cap glass reaction vial was charged with Pd(OAc)<sub>2</sub> (1.1 mg, 0.005 mmol, 5 mol%), BrettPhos (5.4 mg, 0.01 mmol, 10 mol%), phenyl boronic acid (36.6 mg, 0.3 mmol, 3.0 equiv.) and then transferred into an argon-filled glove box. To that, Cs<sub>2</sub>CO<sub>3</sub> (65.2 mg, 0.2 mmol, 2.0 equiv.), radical scavenger (0.1 mmol, 1.0 equiv.) and degassed 1,4-dioxane (666  $\mu$ L) was added followed by 1,2,3,4,5-pentafluorobenzene (16.8 mg, 0.1 mmol, 1.0 equiv.). The vial was then capped with Teflon septum, removed from the glove box, and irradiated using blue LEDs (34 W) while stirring at RT (under fan cooling) for 6 h. After 6 h, the reaction was quenched *via* exposure to air. The reaction mixture was diluted with ethyl acetate and the desired product formation was analyzed by GC-MS and GC-FID analysis.

| Entry | Radical Scavenger (1.0 equiv.) | % Yield of 3a <sup>[a]</sup> |
|-------|--------------------------------|------------------------------|
| 1     | TEMPO                          | np                           |
| 2     | BHT                            | 76%                          |

[a] Yields determined by GC-FID analysis using mesitylene as an internal standard and yield of the minor regioisomer not taken under consideration. TEMPO = (2,2,6,6-Tetramethylpiperidin-1-yl)oxidanyl. BHT = 2,6-Di-tert-butyl-4-methylphenol. np = no product.

## 6. UV-Visible Spectroscopy Analysis

UV-visible spectroscopy was performed for each reaction component and combination of reaction components using a Cary 60 spectrophotometer (Agilent Technologies) at the concentrations present in the  $C(sp^2)$ – $C(sp^2)$  cross-coupling reaction mixture.

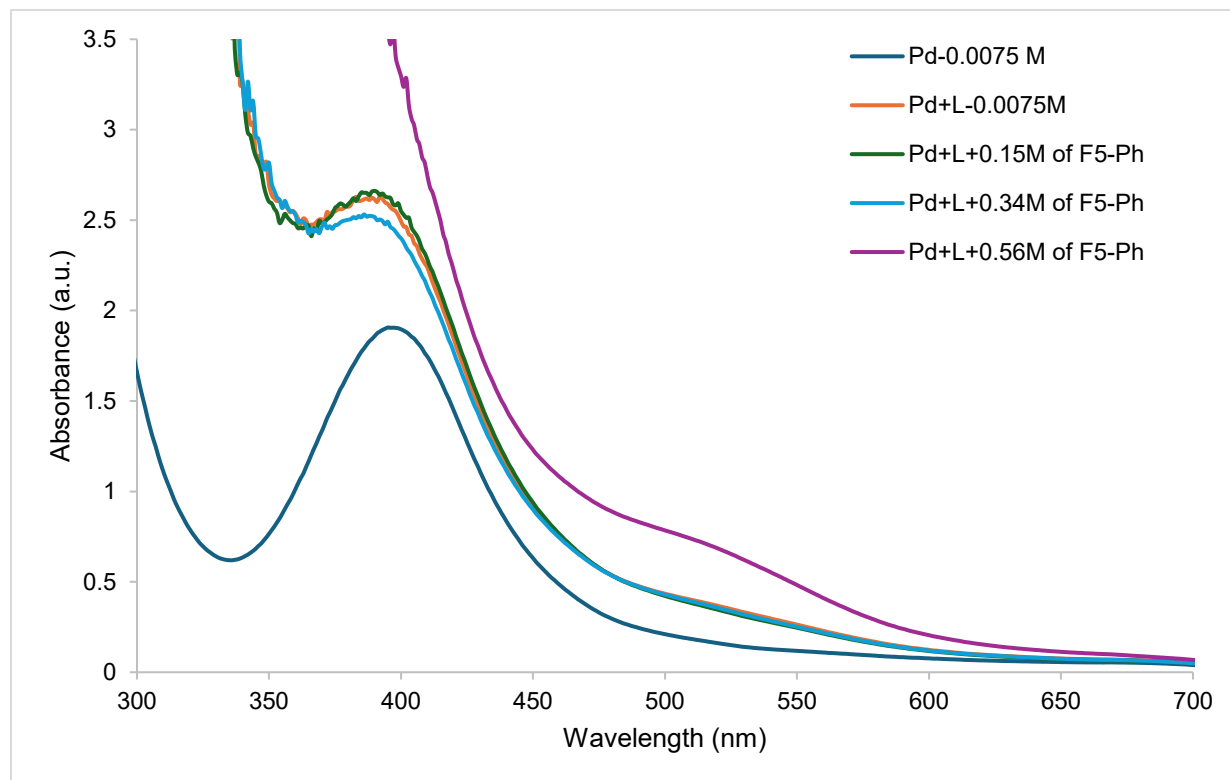

**Fig. S1 UV-Vis spectra of reaction components:** Pd(OAc)<sub>2</sub> (Pd), BrettPhos (L), 1,2,3,4,5-pentafluorobenzene (F5-Ph), individually and combined in 1,4-dioxane.

## 7. Effect of Light: On/Off Plot

A clean 2 mL screw cap glass reaction vial was charged with Pd(OAc)<sub>2</sub> (1.1 mg, 0.005 mmol, 5 mol%), BrettPhos (5.4 mg, 0.01 mmol, 10 mol%), phenyl boronic acid (36.6 mg, 0.3 mmol, 3.0 equiv.) and then transferred into an argon-filled glove box. To that, Cs<sub>2</sub>CO<sub>3</sub> (65.2 mg, 0.2 mmol, 2.0 equiv.), and degassed 1,4-dioxane (666  $\mu$ L) was added followed by 1,2,3,4,5-pentafluorobenzene (16.8 mg, 0.1 mmol, 1.0 equiv.) and mesitylene (0.1 mmol, 1.0 equiv.) as an internal standard and placed in front of the LEDs. The reaction was sequentially stirred under visible light irradiation and in the absence of light. Every one hour an aliquot of 30  $\mu$ L was removed *via* syringe and analyzed by GC-FID. After a total of 6 h the determined yields were plotted against the reaction time.

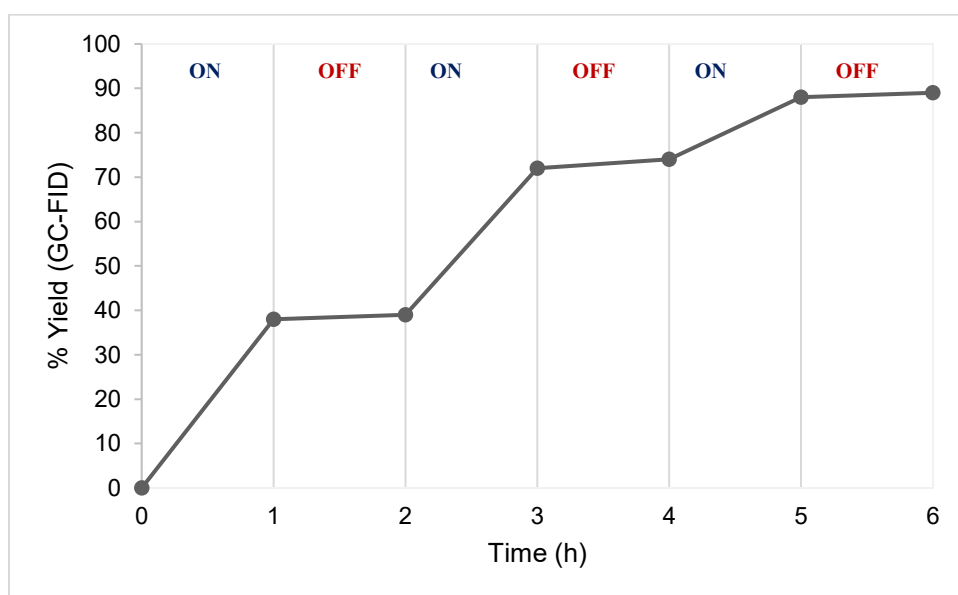

## 8. Hammett Analysis of the C–F Arylation of Pentafluorobenzene with Substituted Arylboronic Acids

### Experimental Procedure

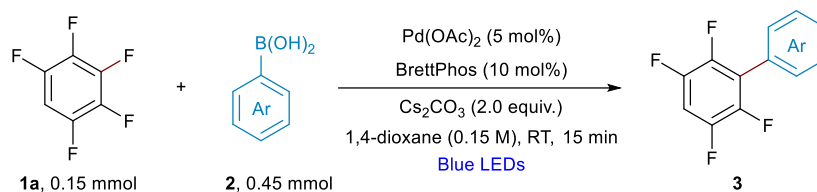

A clean 2 mL screw cap glass reaction vial was charged with Pd(OAc)<sub>2</sub> (1.68 mg, 0.0075 mmol, 5 mol%), BrettPhos (8.05 mg, 0.015 mmol, 10 mol%), aryl boronic acid (0.9 mmol, 3.0 equiv.) and then transferred into an argon-filled glove box. To that, Cs<sub>2</sub>CO<sub>3</sub> (97.7 mg, 0.3 mmol, 2.0 equiv.), and degassed 1,4-dioxane (1 mL) were then added followed by 1,2,3,4,5-pentafluorobenzene (25.21 mg, 0.15 mmol, 1.0 equiv.). The vial was then capped with Teflon septum, removed from the glove box, and irradiated using blue LEDs (34 W) while stirring at RT (under fan cooling, temperature 33±2 °C) for 15 mins. After 15 mins, the reaction mixture was diluted with diethyl ether and washed with water. The combined organic layer was collected, dried over anhydrous Na<sub>2</sub>SO<sub>4</sub>, and concentrated under reduced pressure (rotary evaporator, bath temperature 30 °C). 2,2,2-trifluoroethanol (TFE, 0.15 mmol, 1.0 equiv.) was added as an internal standard to the crude residue together with CDCl<sub>3</sub> and the sample was analyzed by quantitative <sup>19</sup>F NMR (377 MHz).

### Quantification Method

Product yields were determined by integration of the diagnostic aromatic <sup>19</sup>F resonances of each tetrafluorobiaryl product ( $\delta$  around –144 ppm which corresponds to two fluorines in the products) relative to the TFE internal standard ( $\delta$  –77.4 to –77.7 ppm, t,  $J$  = 8.3 Hz). Residual pentafluorobenzene was quantified independently from its isolated *para*-F resonance ( $\delta$  –153 to –155 ppm), which does not overlap with any product or standard signal.

Table I. Hammett Data Set<sup>a</sup>

| Entry | Ar-PhB(OH) <sub>2</sub> | Hammett ( $\sigma_p$ ) | Product yield (%<br>15 min) <sup>b</sup> | Pentafluoro-<br>benzene consumed <sup>c</sup> | Mass-balance<br>gap <sup>d</sup> |
|-------|-------------------------|------------------------|------------------------------------------|-----------------------------------------------|----------------------------------|
| 1     | 4-OMe                   | –0.27                  | 7                                        | ~95%                                          | Large                            |
| 2     | 4-Me                    | –0.17                  | 12                                       | >95%                                          | Large                            |
| 3     | H                       | 0.00                   | 21                                       | >95%                                          | Large                            |
| 4     | 4-CO <sub>2</sub> Et    | +0.45                  | 15                                       | ~25%                                          | Small                            |
| 5     | 4-CF <sub>3</sub>       | +0.54                  | 6                                        | ~14%                                          | Small                            |
| 6     | 4-CN                    | +0.66                  | 0                                        | ~5%                                           | Small                            |

<sup>a</sup>All reactions run for 15 min under standard irradiation conditions; conversion and yield determined by quantitative <sup>19</sup>F NMR using TFE as internal standard (added post-work-up). <sup>b</sup> $\sigma_p$  values from C. Hansch, A. Leo and R. W. Taft, *Chem. Rev.* 1991, **91**, 165-195. <sup>c</sup>estimated from disappearance of the pentafluorobenzene *para*-F resonance ( $\delta$  –153 to –155 ppm) relative to the t = 0 reference. <sup>d</sup>difference between pentafluorobenzene consumed and product formed; a large gap indicates substantial non-productive consumption of pentafluorobenzene.

**Figure I. Hammett Plot for six ArB(OH)<sub>2</sub>**

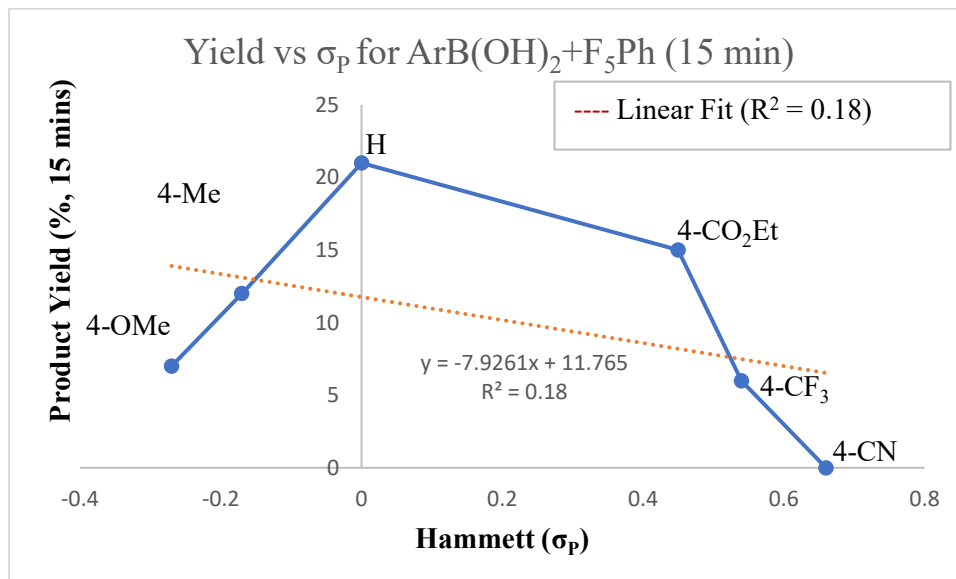

Product yield (% 15 min) plotted against Hammett  $\sigma_p$  for the six arylboronic acid substituents examined. The dashed line is a least-squares fit to all six points and is shown for visual reference only (see analysis below).

**Figure II. Hammett Plot for five ArB(OH)<sub>2</sub> excluding 4-CNC<sub>6</sub>H<sub>4</sub>B(OH)<sub>2</sub>**

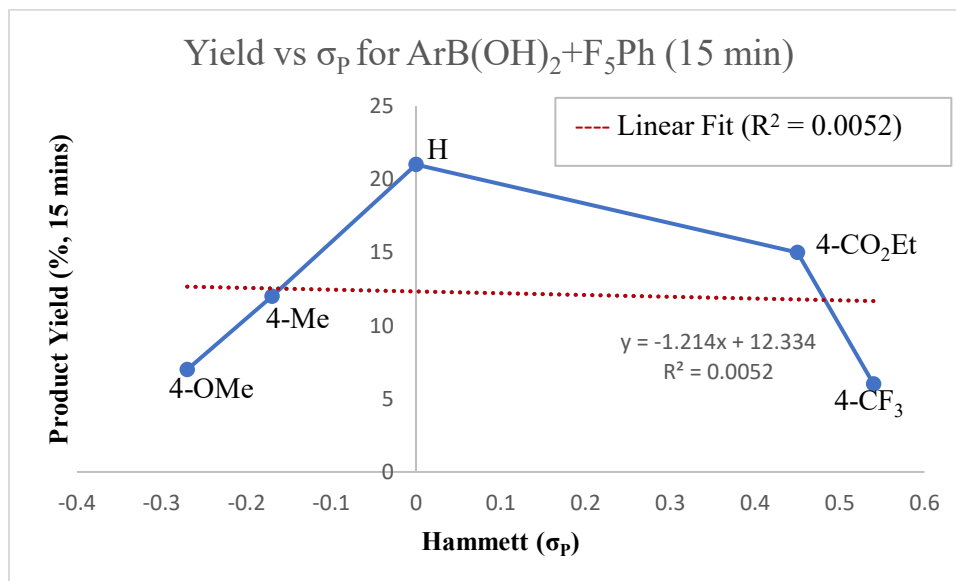

Product yield (% 15 min) plotted against Hammett  $\sigma_p$  for the five arylboronic acid substituents examined. The dashed line is a least-squares fit to all five points and is shown for visual reference only (see analysis below).

**Table II. Regression Analysis**

| Regression model                                | Slope ( $\rho$ ) | R <sup>2</sup> | <i>p</i> -value |
|-------------------------------------------------|------------------|----------------|-----------------|
| Yield (%) vs. $\sigma_p$ - all six substituents | -7.93            | 0.18           | 0.40            |
| Yield (%) vs. $\sigma_p$ - excluding 4-CN       | -1.21            | 0.0052         | 0.91            |

Linear regression of product yield (%) against  $\sigma_p$ , performed (i) across all six substituents and (ii) excluding 4-CN-C<sub>6</sub>H<sub>4</sub>B(OH)<sub>2</sub>.

Hammett studies were conducted using six *para*-substituted arylboronic acids ( $\sigma_p = -0.27$  to  $+0.66$ ) under the standard reaction conditions, with product formation quantified by <sup>19</sup>F NMR spectroscopy after 15 min of reaction time (Table I, Figure I). However, the resulting plot of product yield vs  $\sigma_p$  did not exhibit a meaningful linear free-energy relationship ( $R^2 = 0.18$  for the full data set;  $R^2 = 0.01$  upon exclusion of the zero-yield 4-CNC<sub>6</sub>H<sub>4</sub>B(OH)<sub>2</sub> data point). Consequently, a statistically meaningful reaction constant ( $\rho$ ) could not be extracted from the data.

The Hammett plot displays a non-linear, U-shaped dependence, with diminished yields observed for both electron-rich and electron-poor aryl boronic acid substrates and the highest yield obtained for PhB(OH)<sub>2</sub>. Based on the above results, it can be concluded that the observed yields depend on the combination of several electronically sensitive processes and not on a common single rate-determining step. The interpretation is consistent by quantitative <sup>19</sup>F NMR analysis (Table I, column 5) for electron-rich and unsubstituted aryl boronic acids (entries 1-3) where pentafluorobenzene was almost completely consumed despite relatively low product yields (7–21%). This result might indicate for the operation of a competing, non-productive light-mediated consumption pathway for the polyfluoroarene. On contrary, for the reaction with electron-deficient aryl boronic acids (entries 4-6), significant amounts of pentafluorobenzene remained unreacted. This effect turns out presumably due to less favorable conditions for transmetalation as the nucleophilicity of the boronic acid decreases.

These combined observations suggest that there are at least two mechanistically distinct and substituent-sensitive pathways in the reaction, rather than a common rate-determining step. Under such conditions, assignment of a single Hammett reaction constant ( $\rho$ ) would not provide a meaningful mechanistic interpretation. Therefore, we have not included a Hammett correlation in the main manuscript.

## 9. NMR data of products

### 2,3,5,6-tetrafluoro-1,1'-biphenyl (3a):

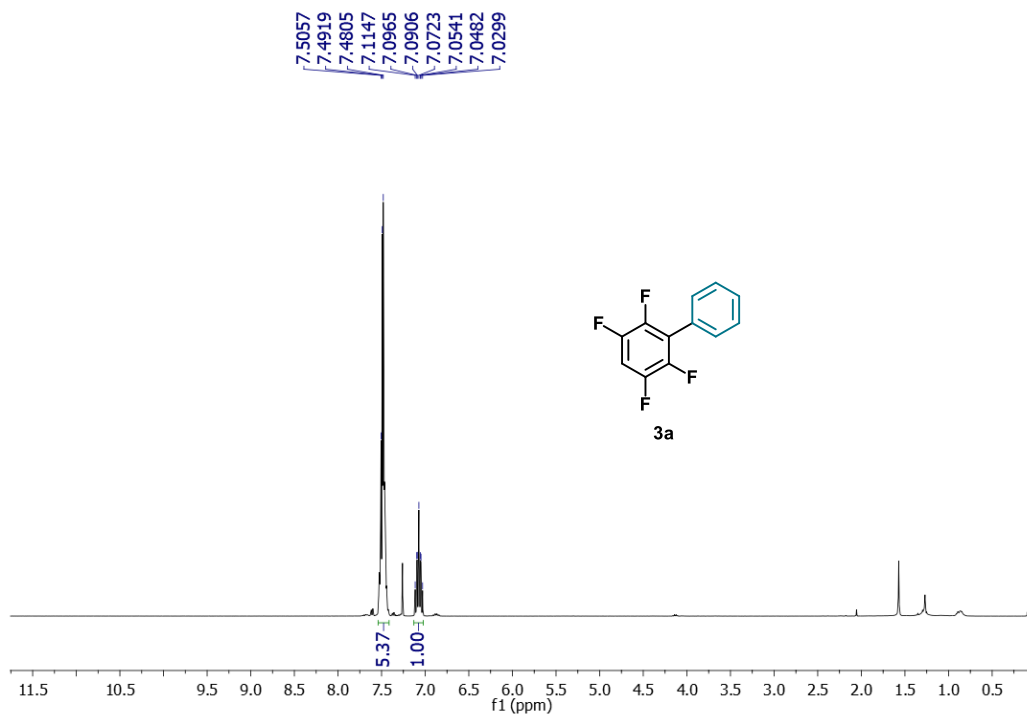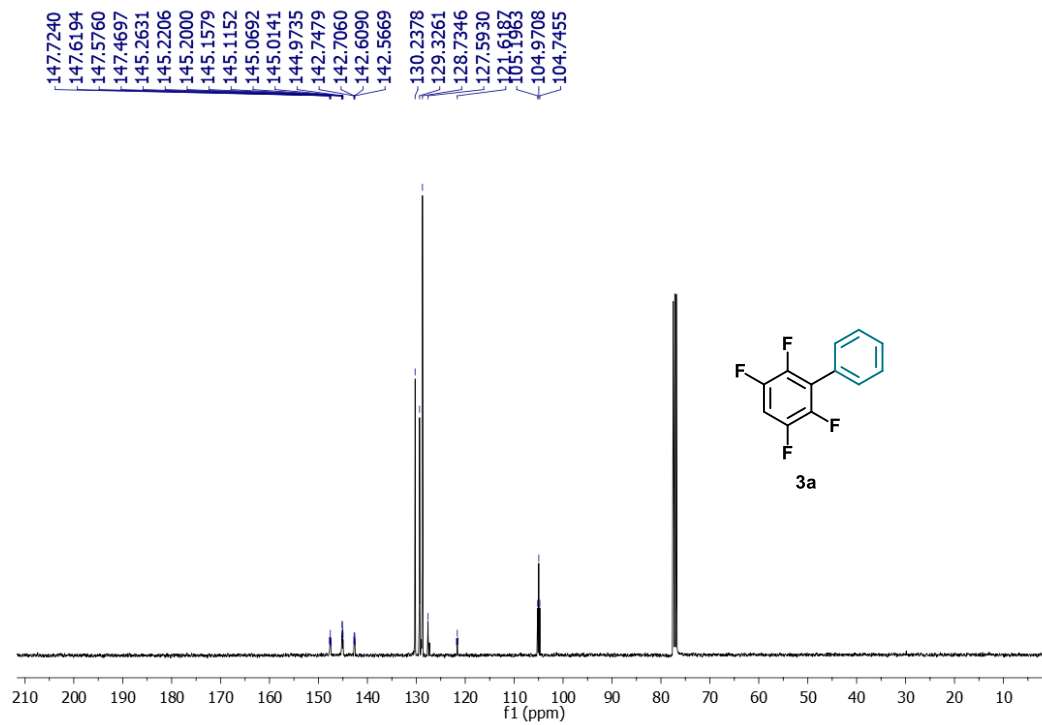

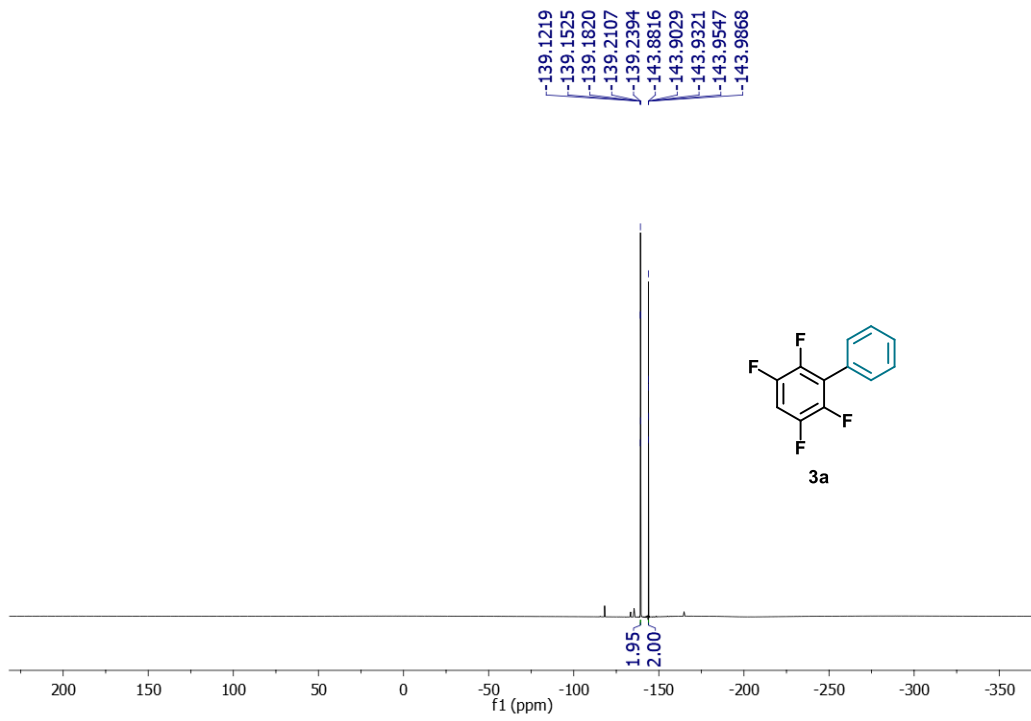

### 2,3,5,6-tetrafluoro-2'-methoxy-1,1'-biphenyl (3b):

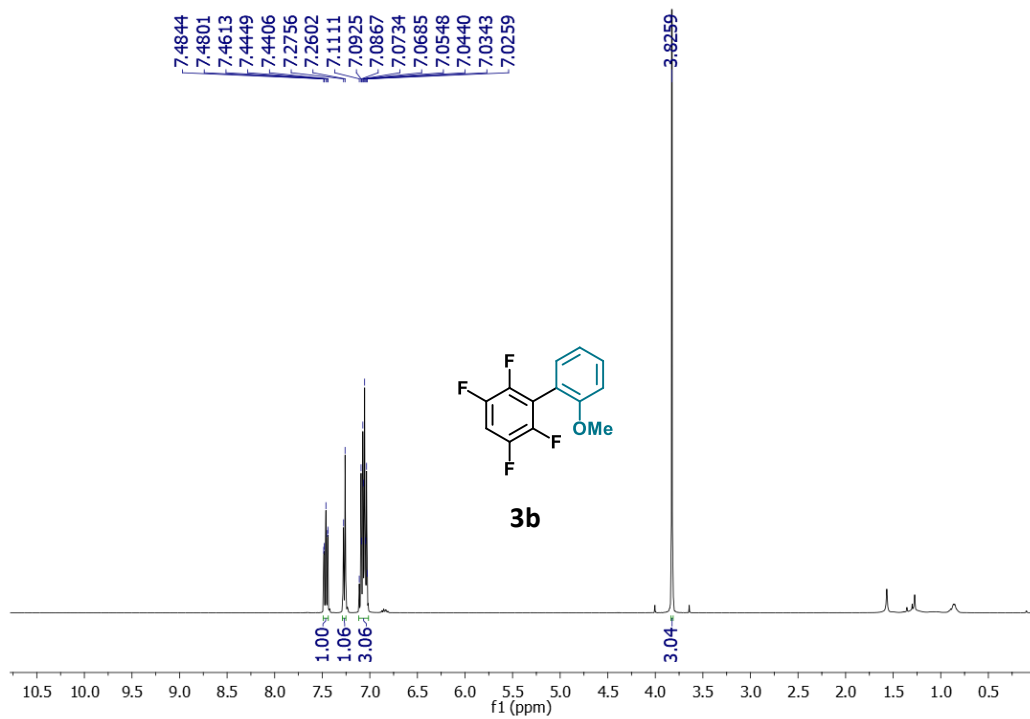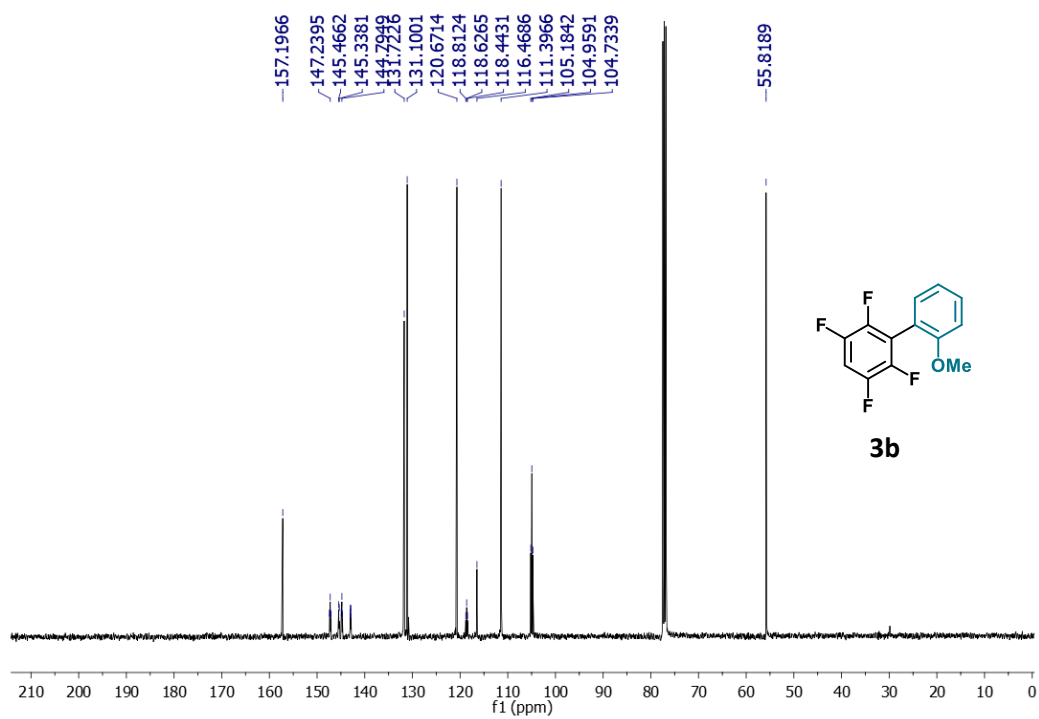

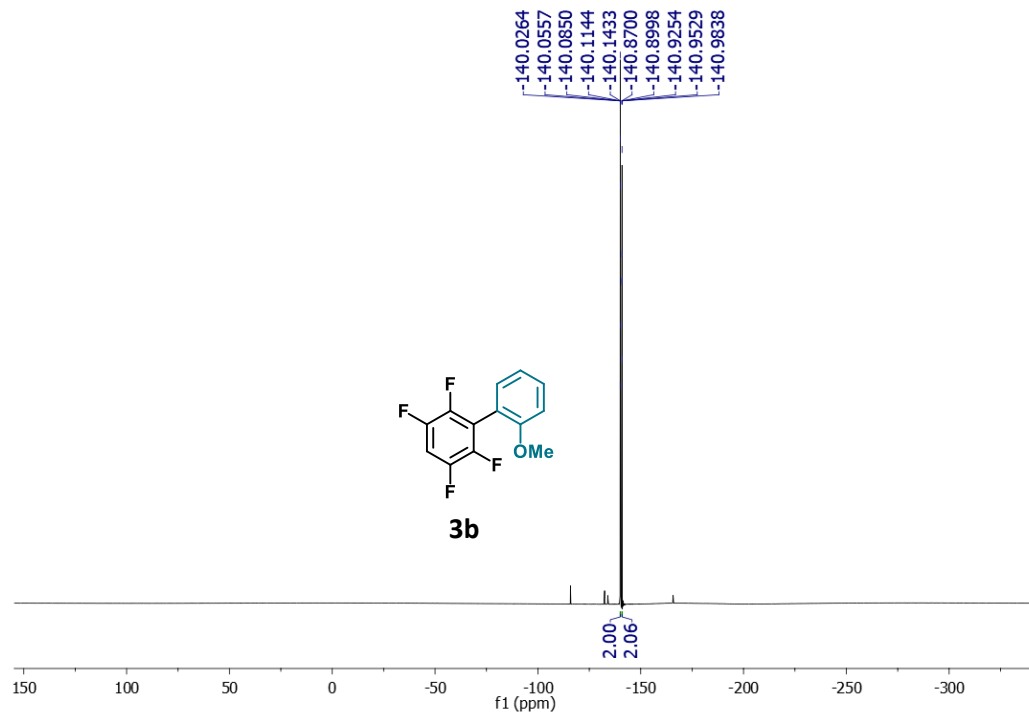

### 2,3,5,6-tetrafluoro-1,1':2',1''-terphenyl (3c):

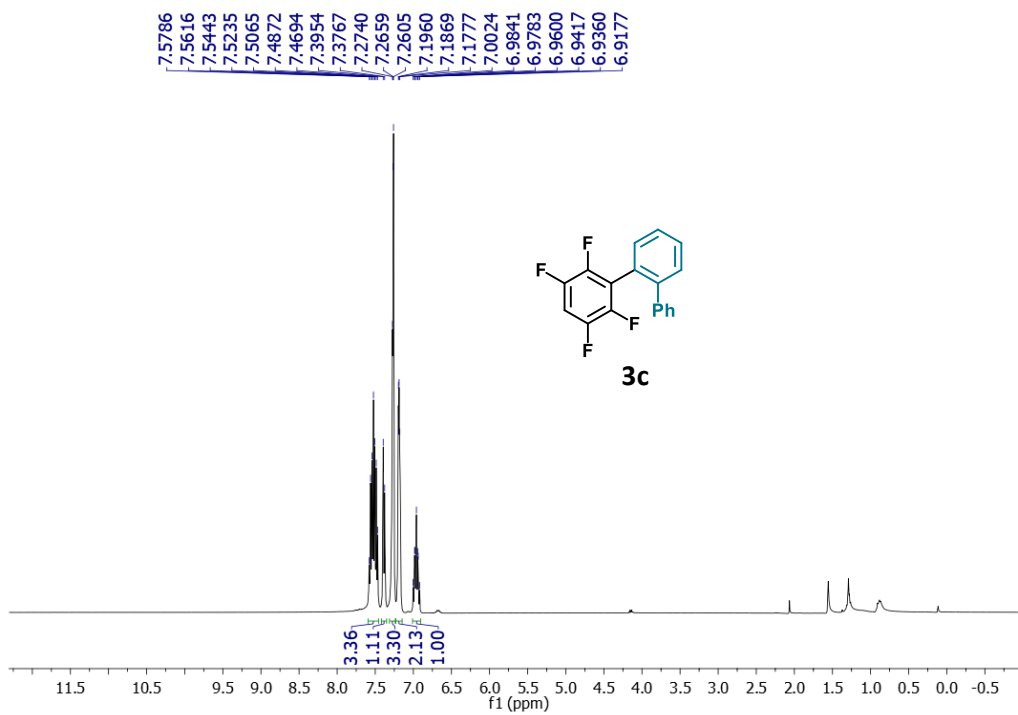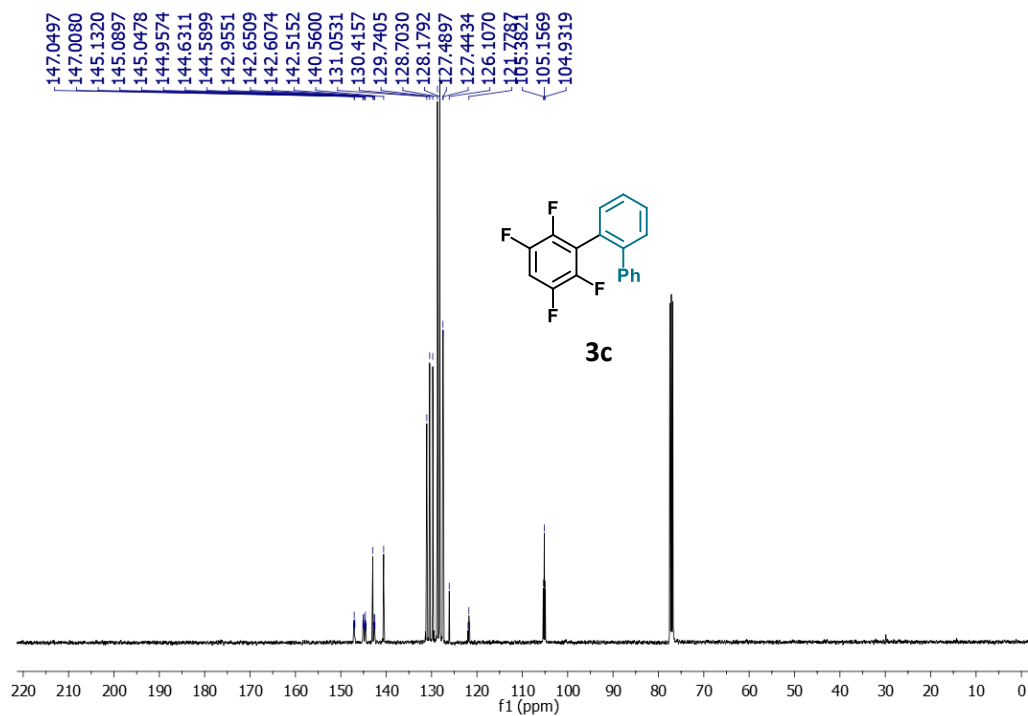

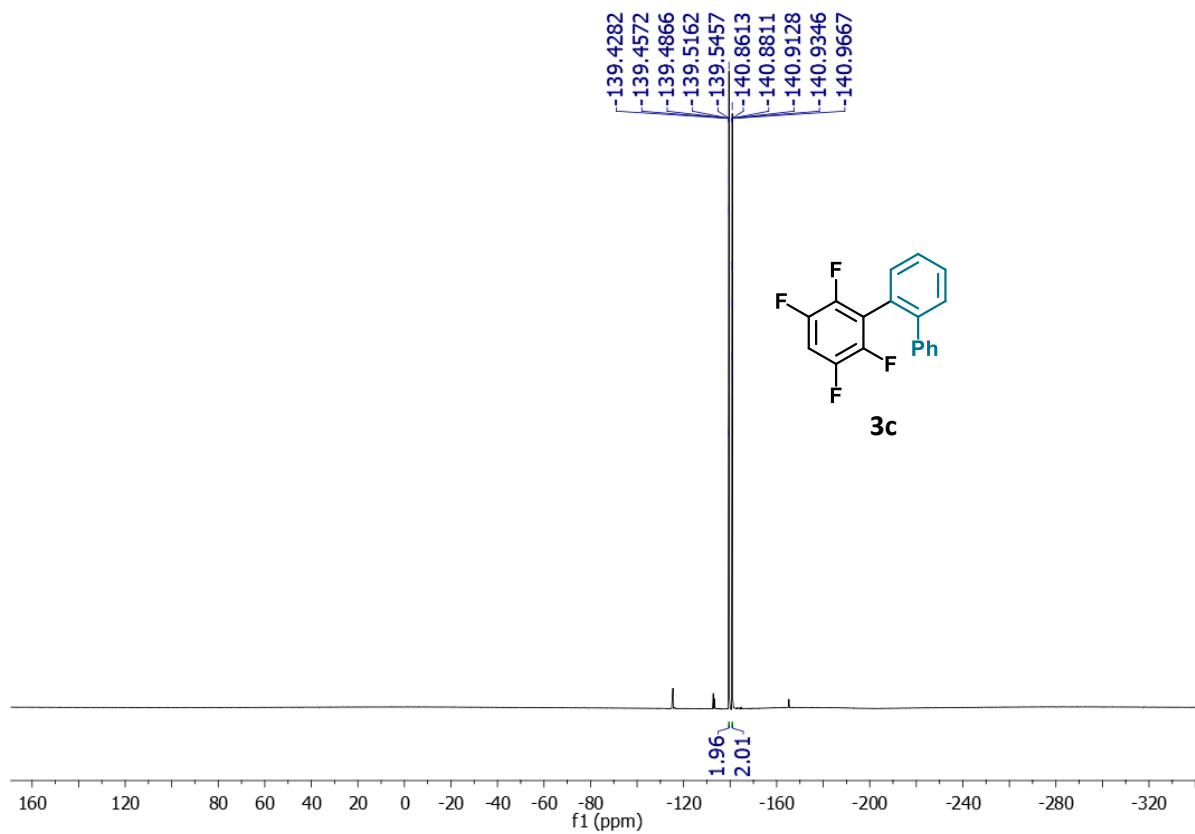

2,3,5,6-tetrafluoro-4'-methyl-1,1'-biphenyl (3d):

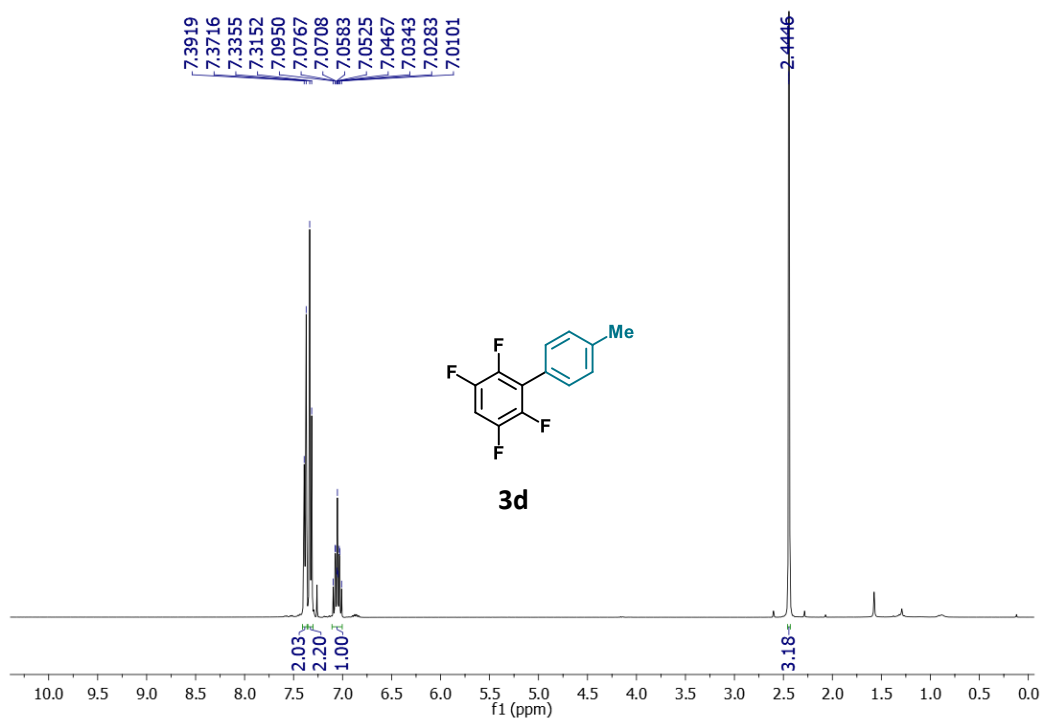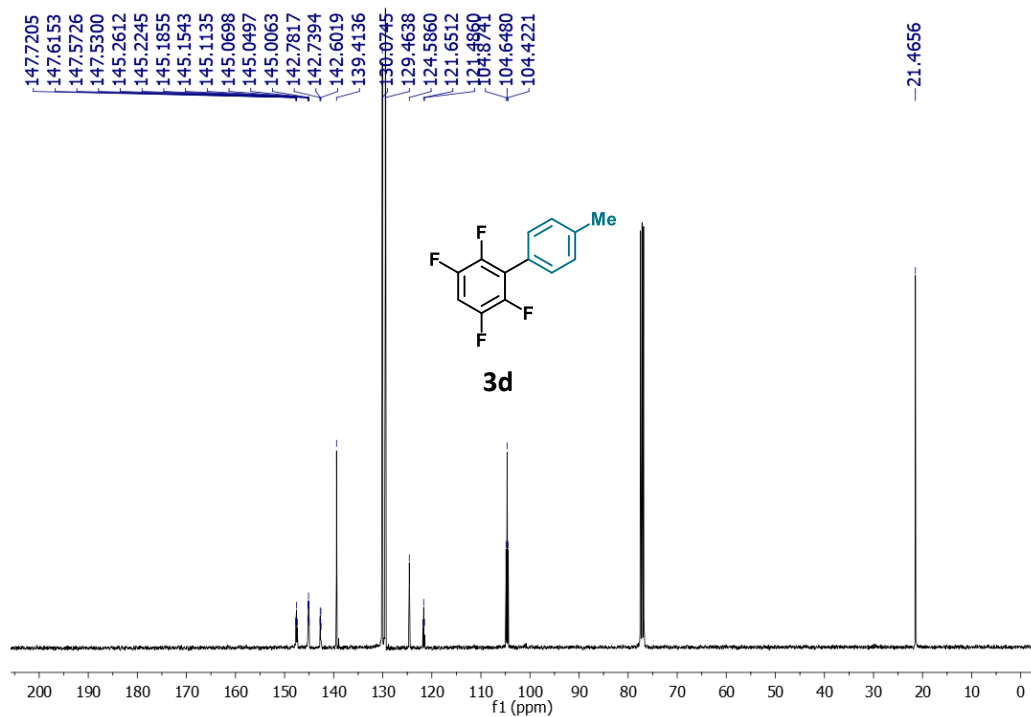

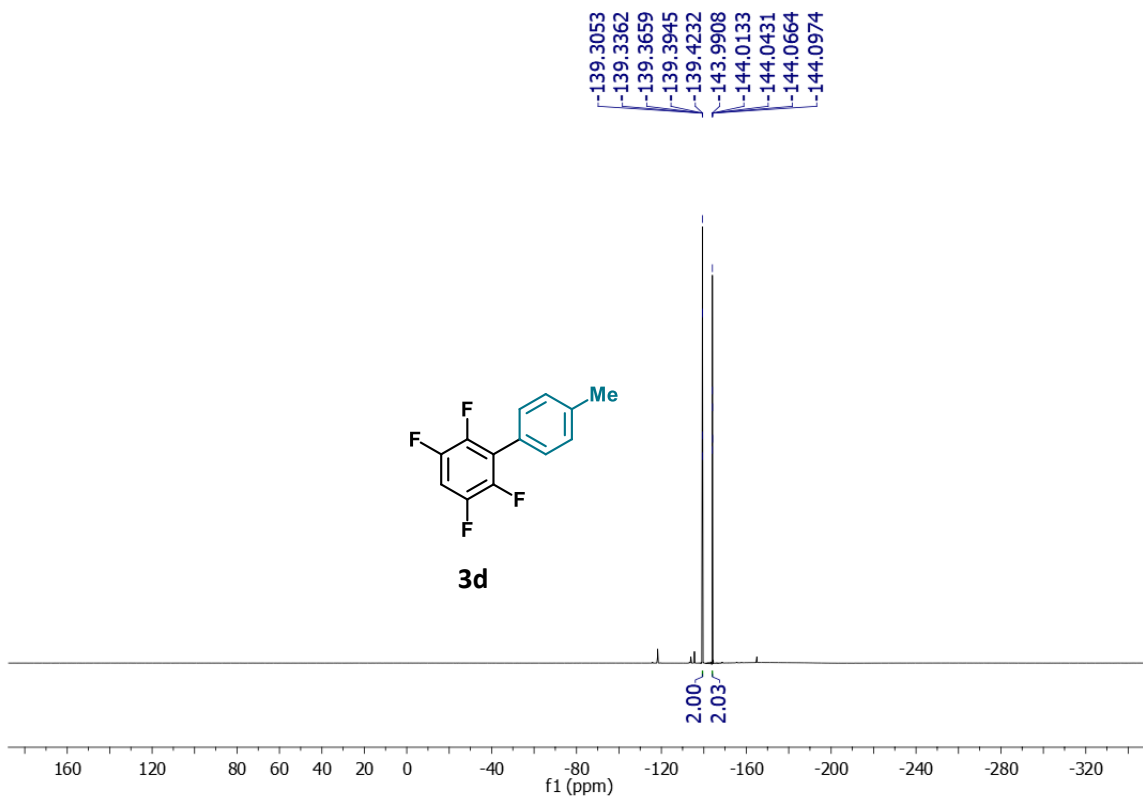

4'-(tert-butyl)-2,3,5,6-tetrafluoro-1,1'-biphenyl (3e):

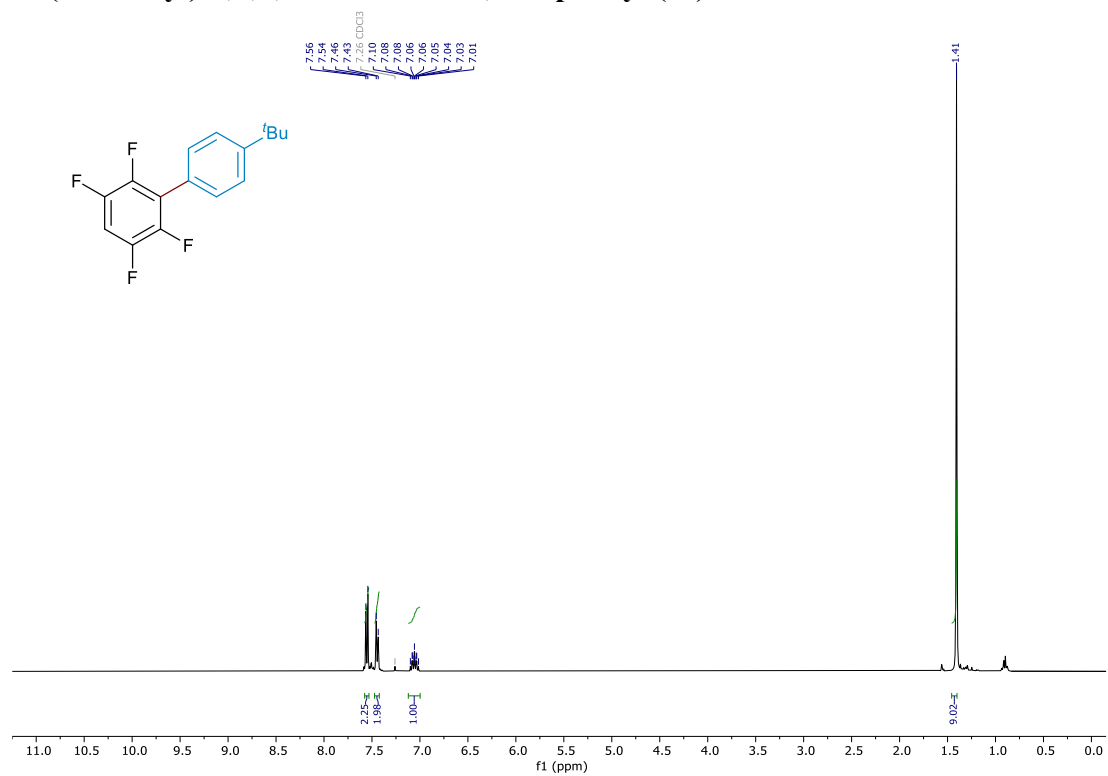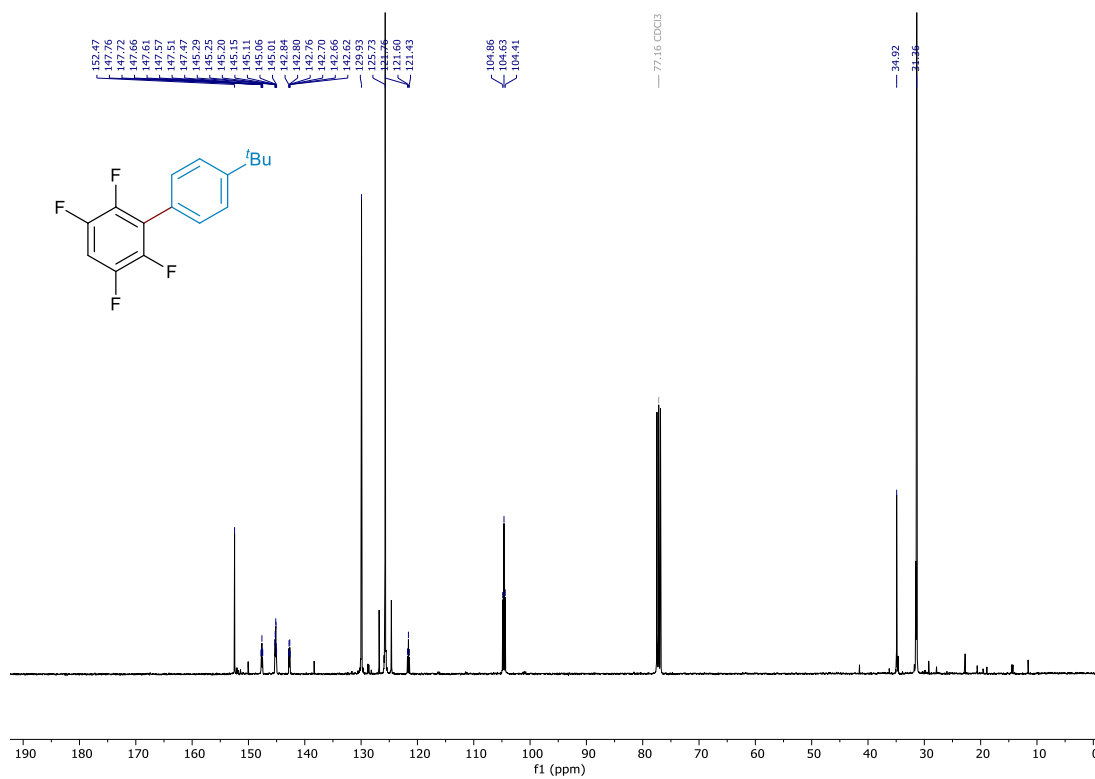

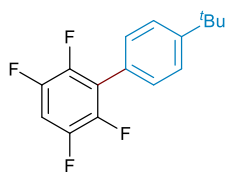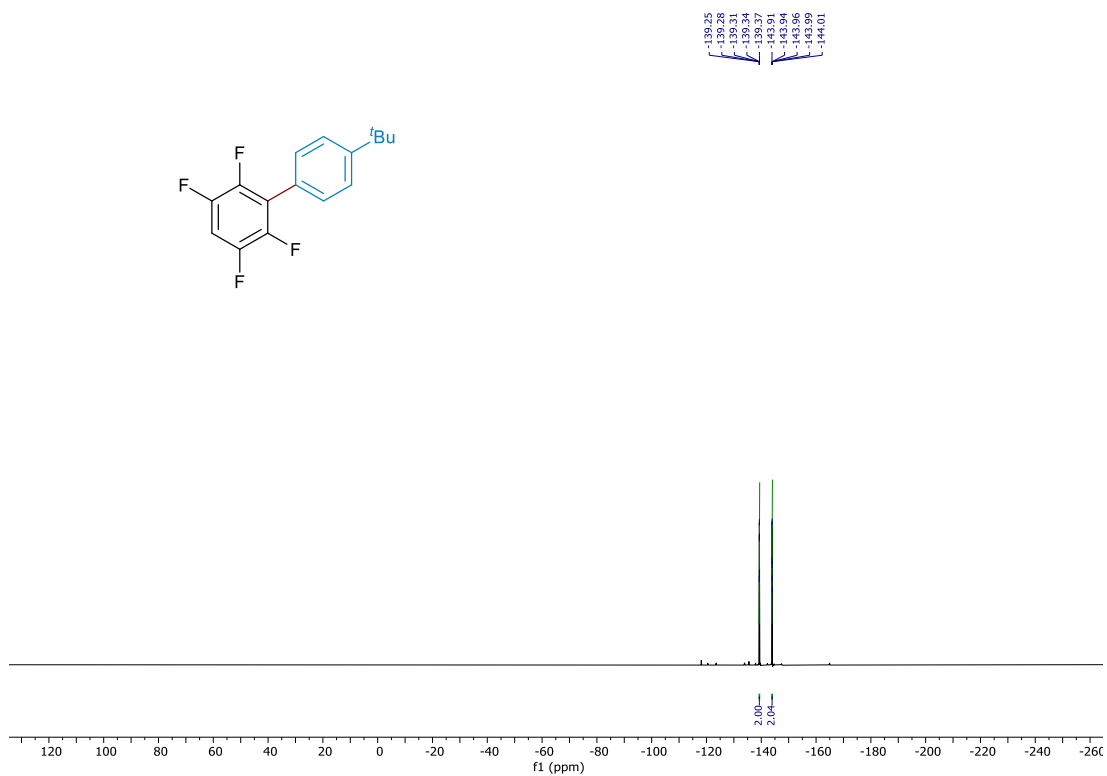

### 2,3,5,6-tetrafluoro-1,1':4',1''-terphenyl (3f):

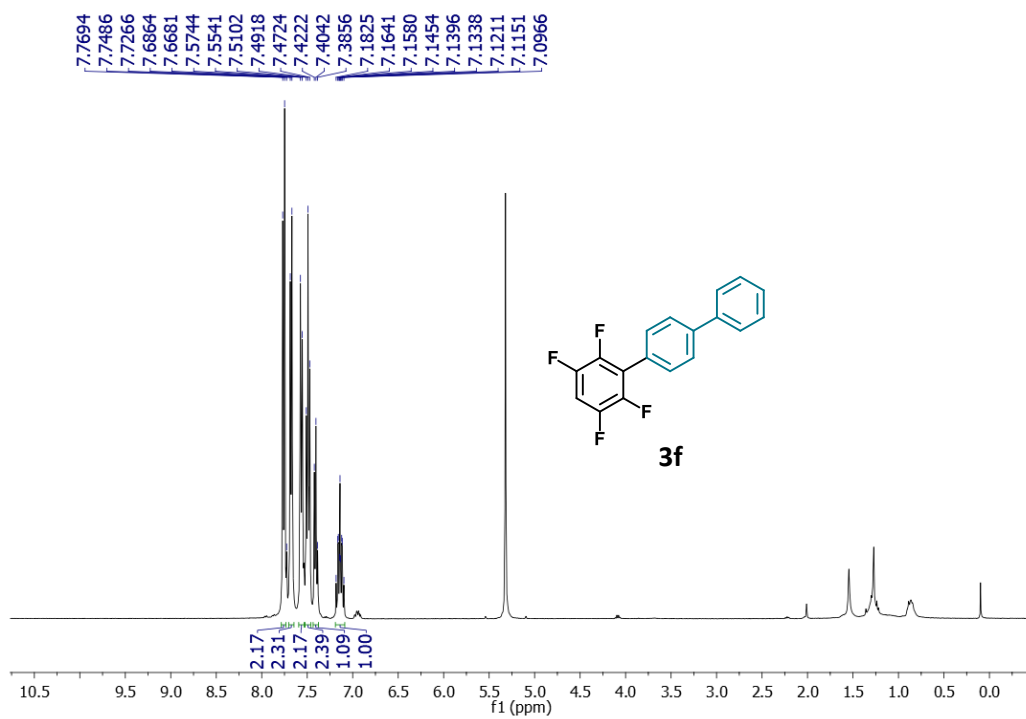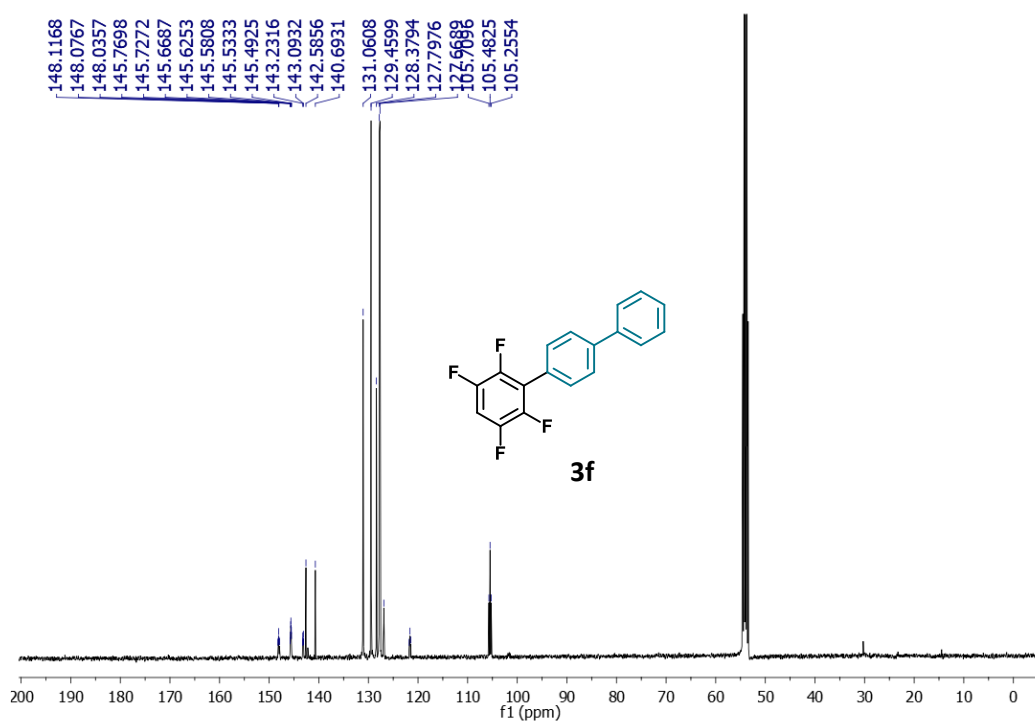

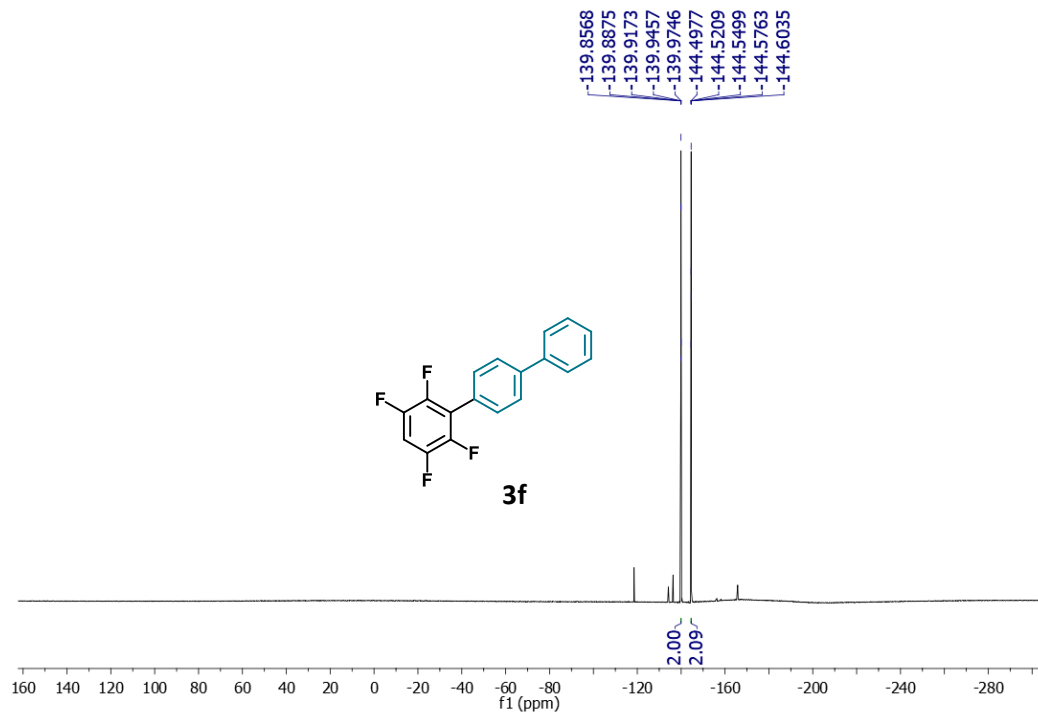



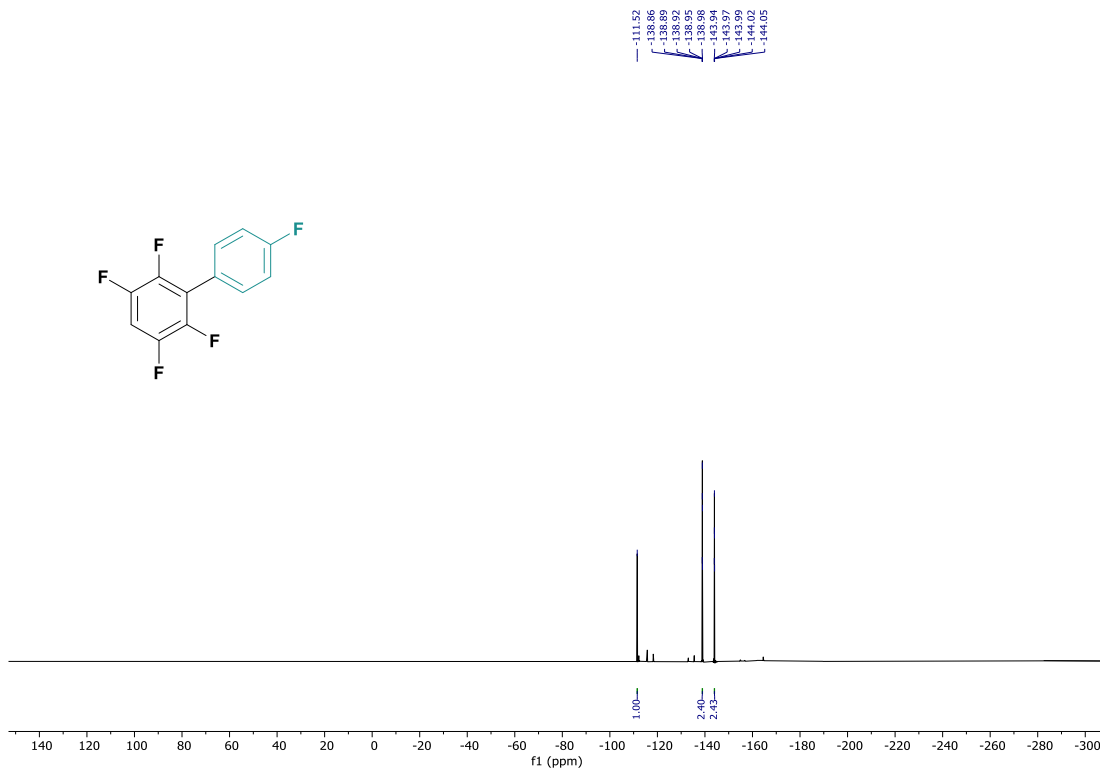

2,3,5,6-tetrafluoro-4'-methoxy-1,1'-biphenyl (3h):

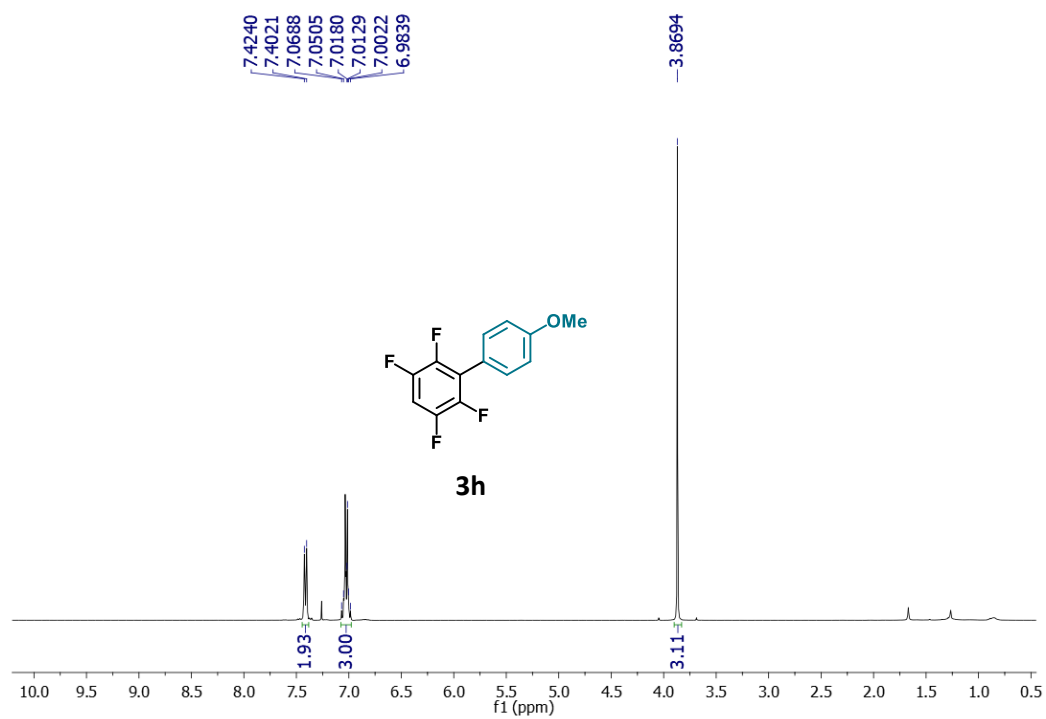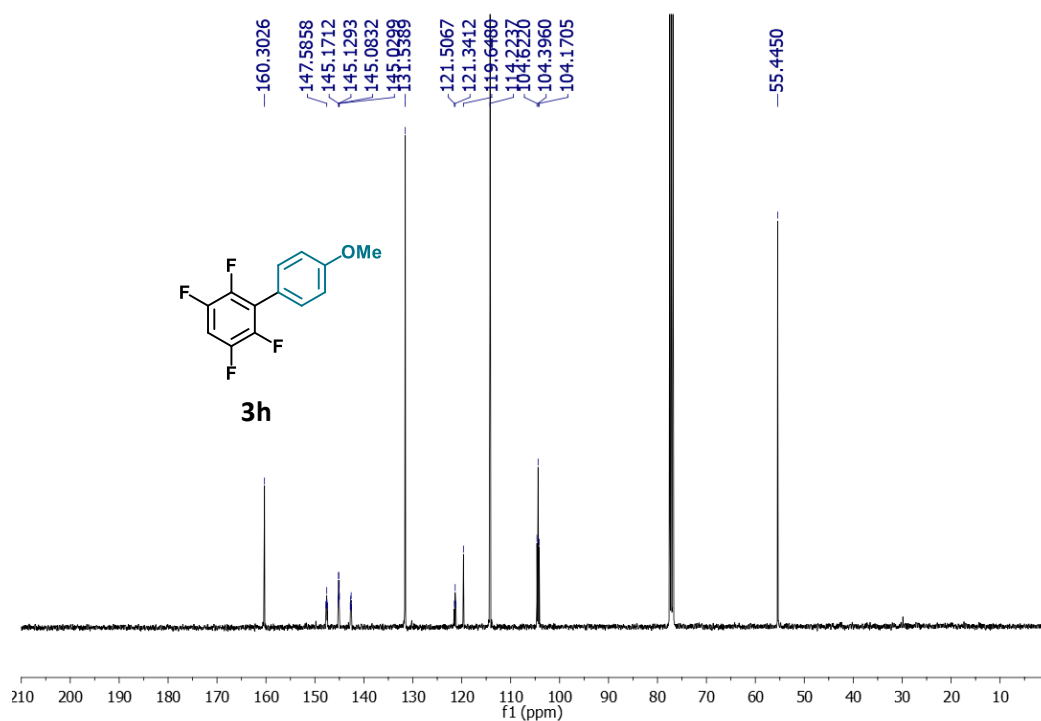

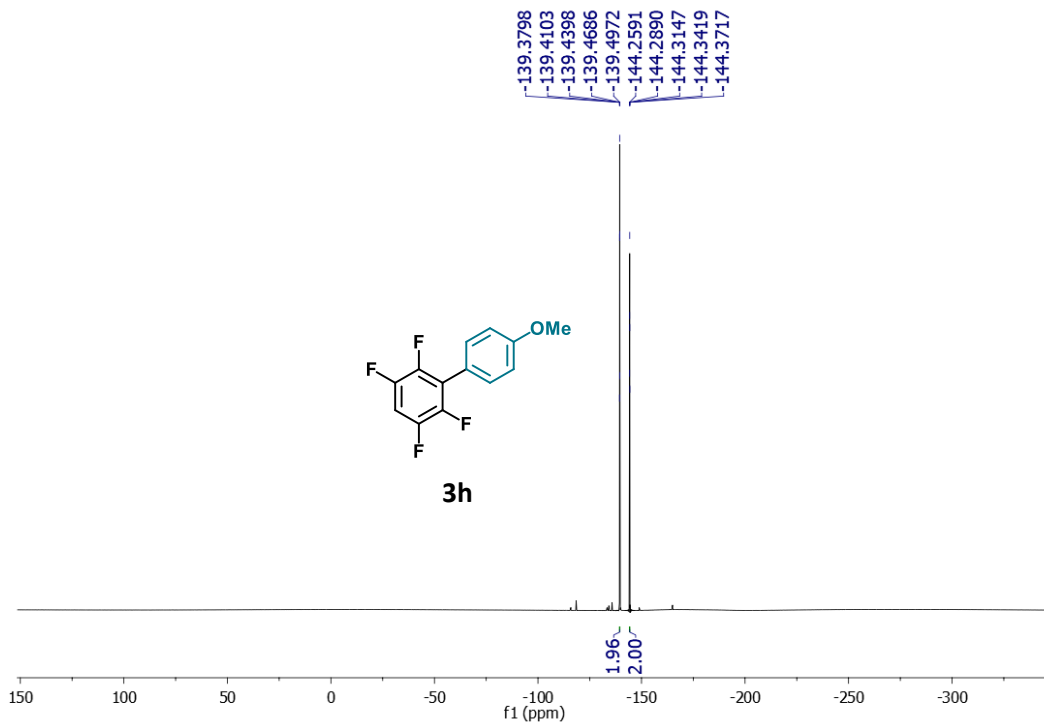

### 2,3,5,6-tetrafluoro-4'-phenoxy-1,1'-biphenyl (3i):

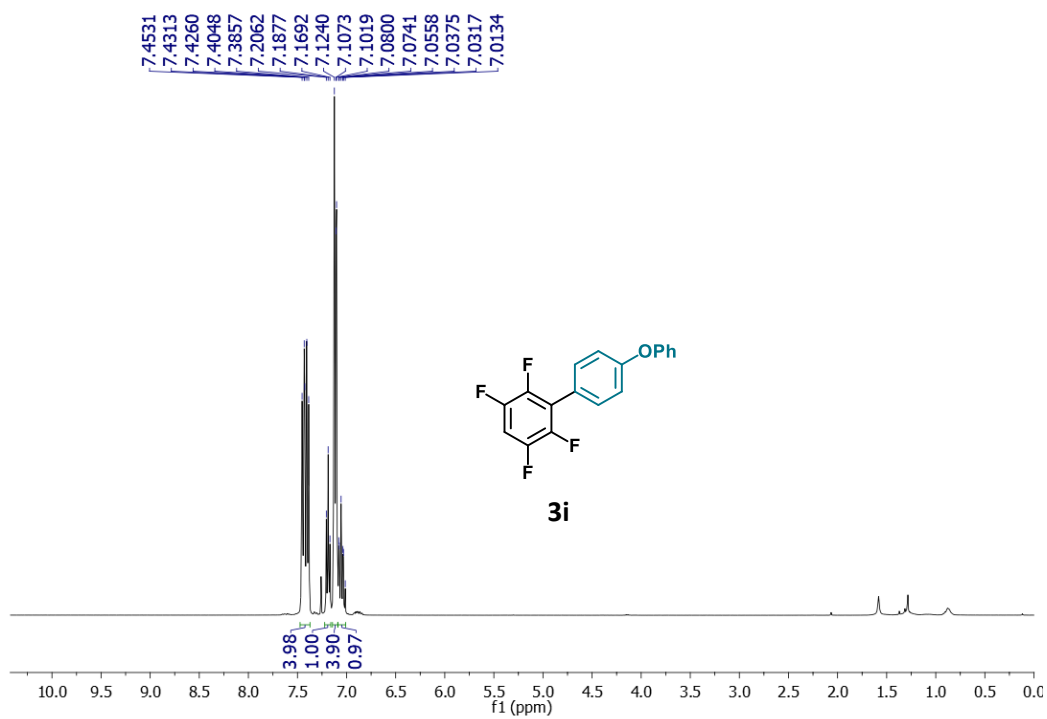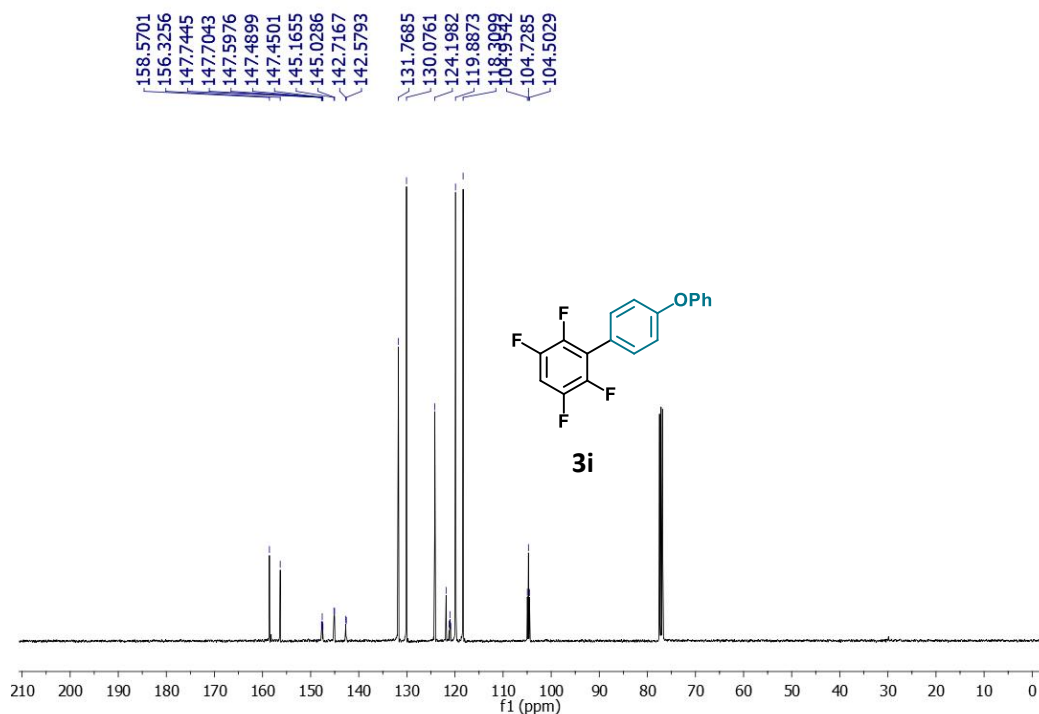

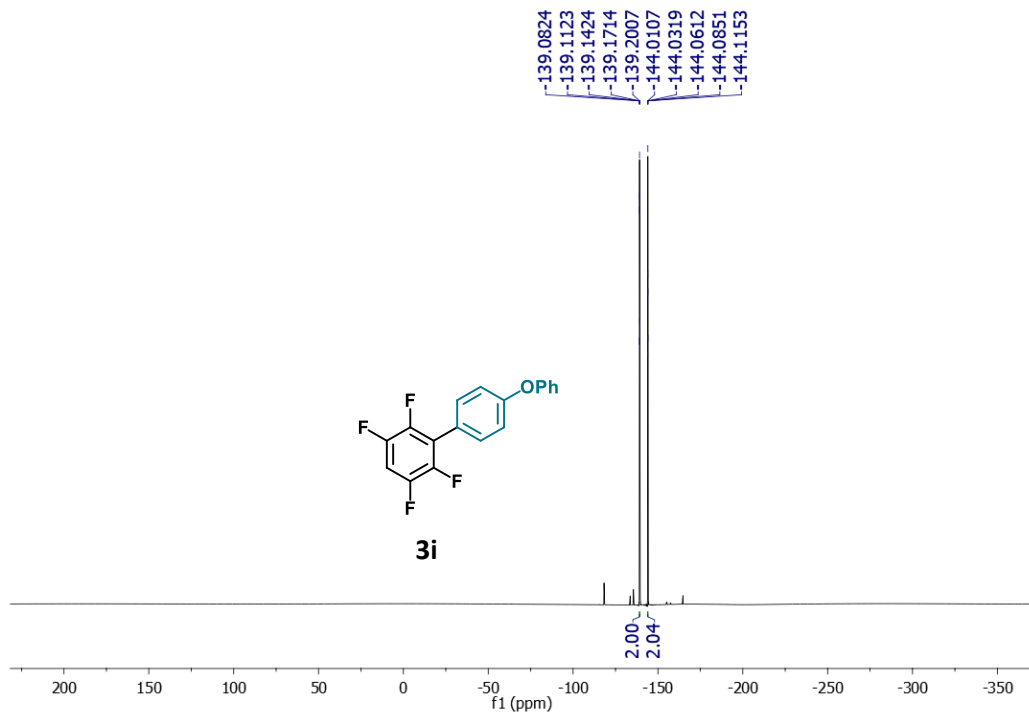

Ethyl 2',3',5',6'-tetrafluoro-[1,1'-biphenyl]-4-carboxylate (3j):

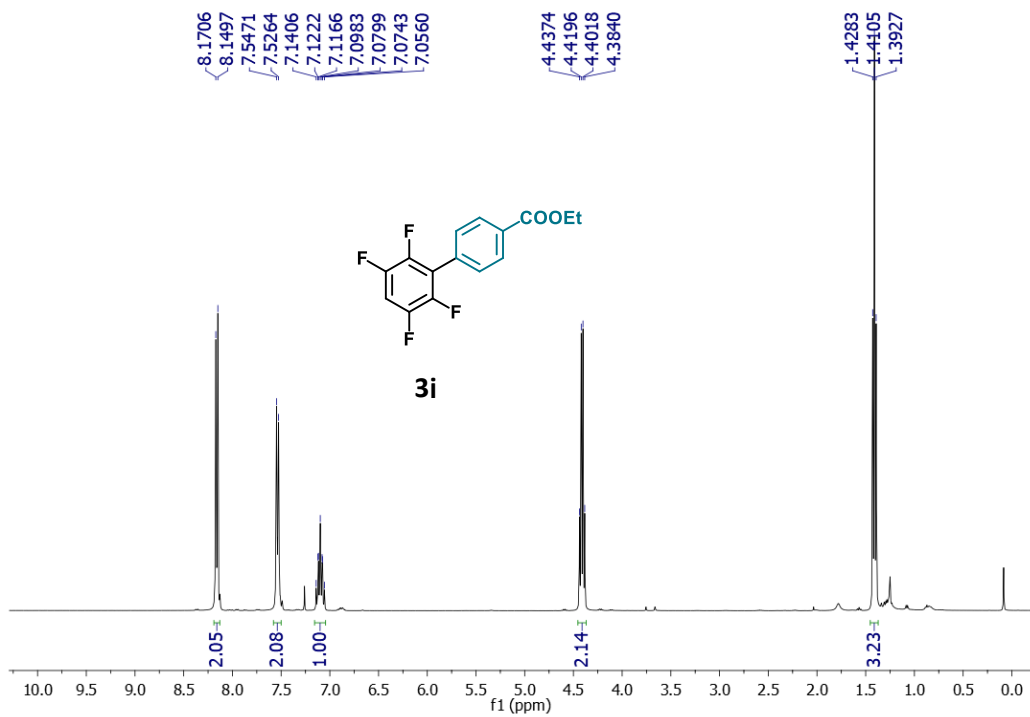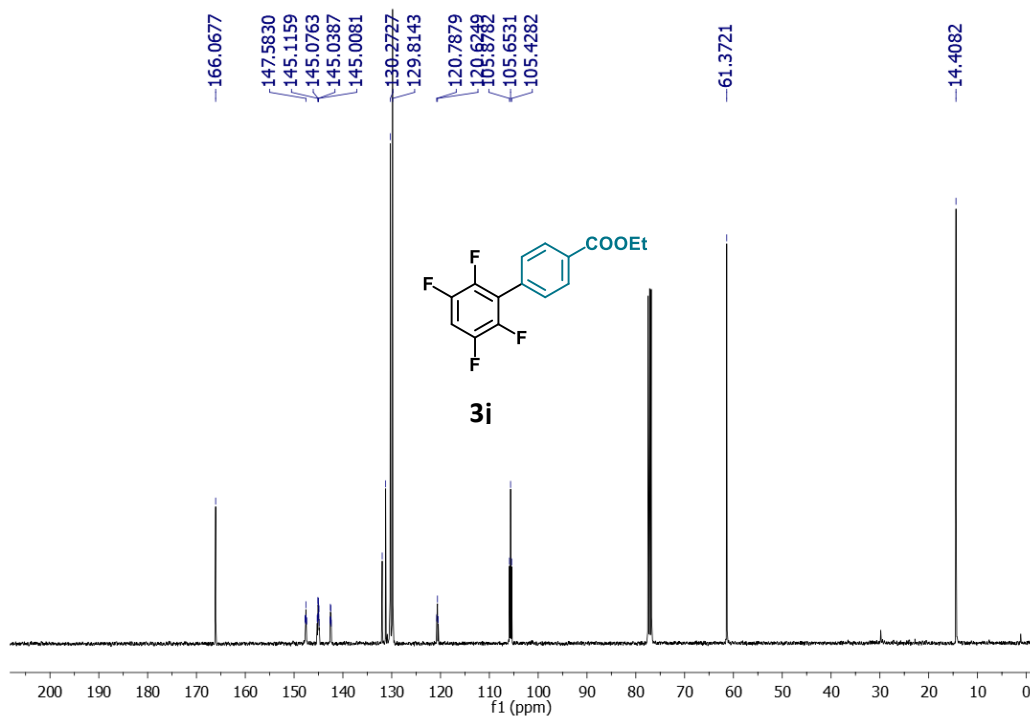

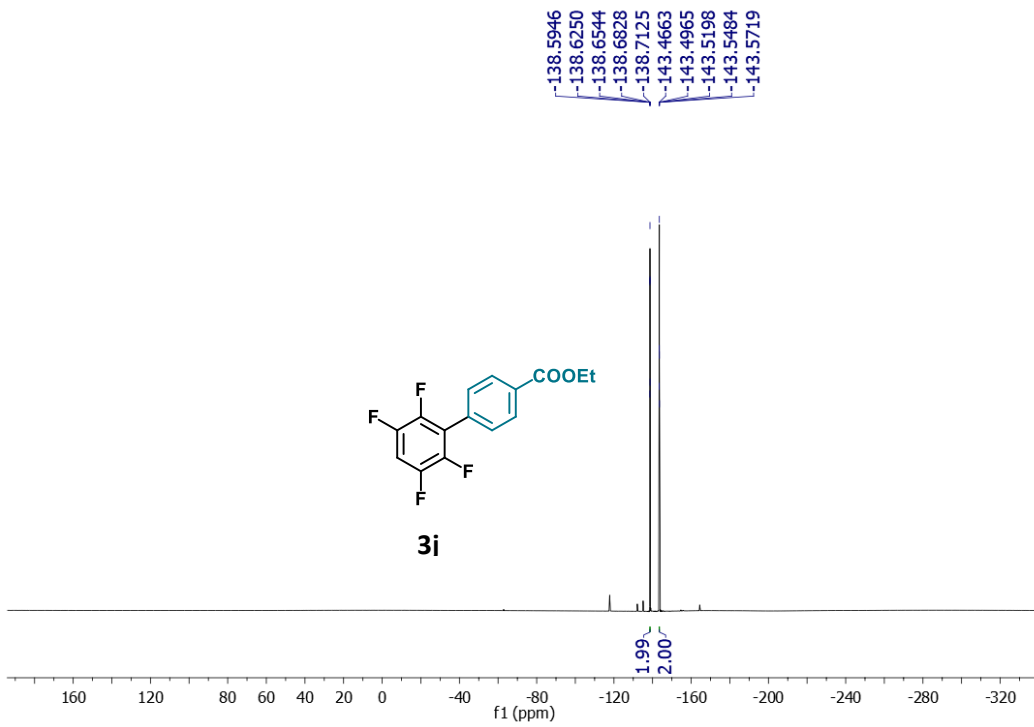

# 2,3,5,6-tetrafluoro-4'-(trifluoromethyl)-1,1'-biphenyl (3k):

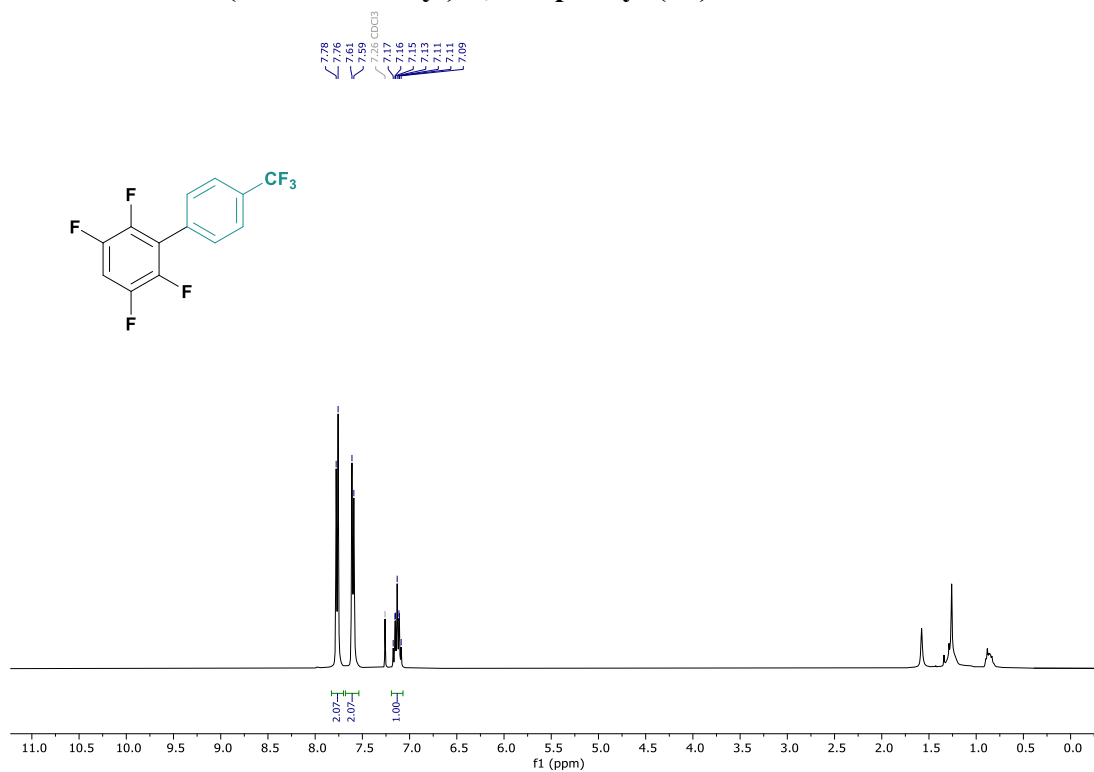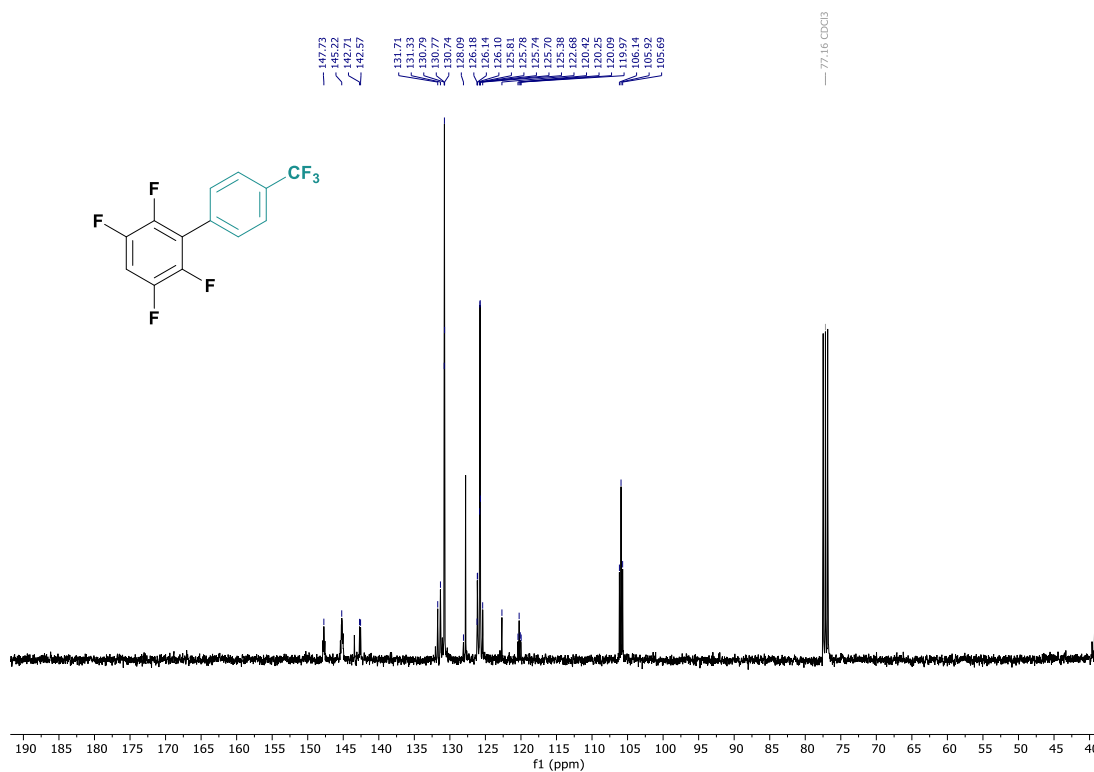

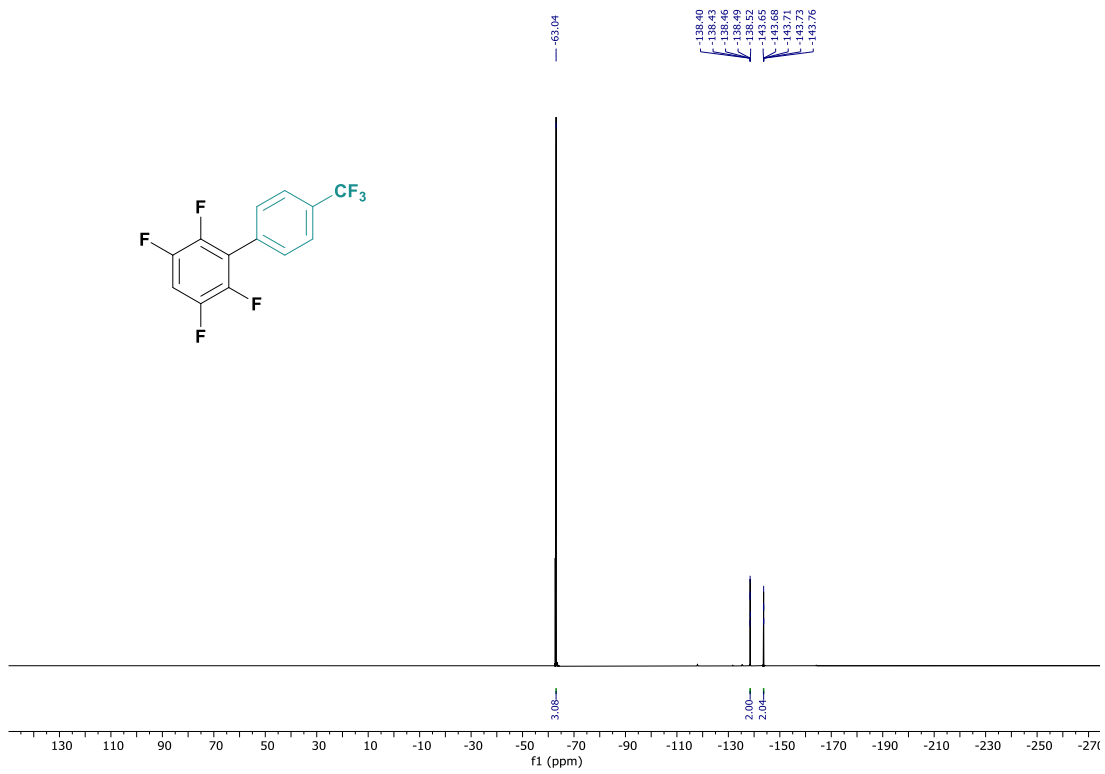

# 2',3',5',6'-tetrafluoro-[1,1'-biphenyl]-4-carbonitrile (3l):

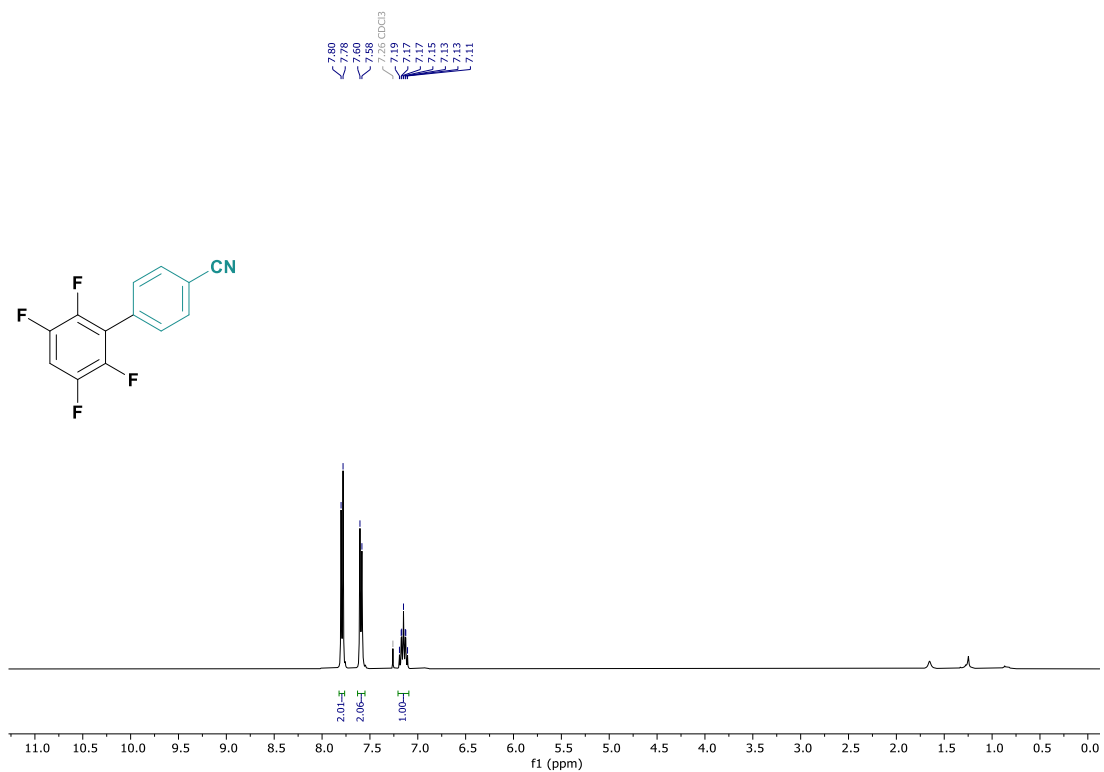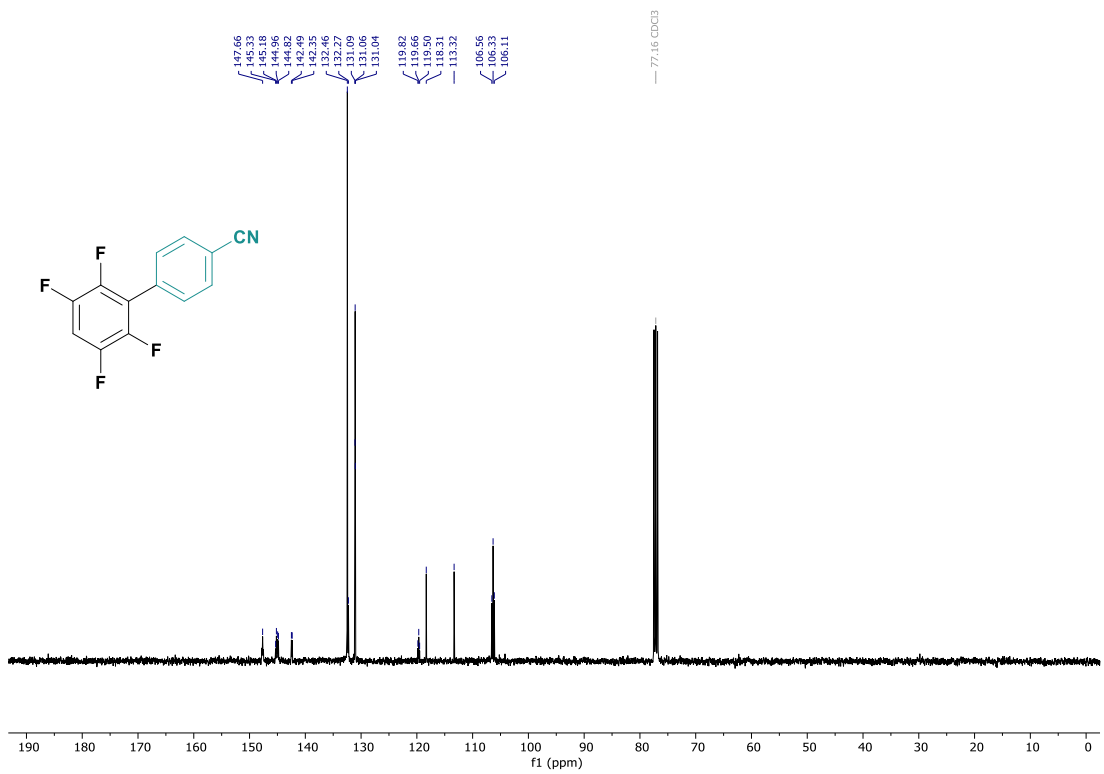

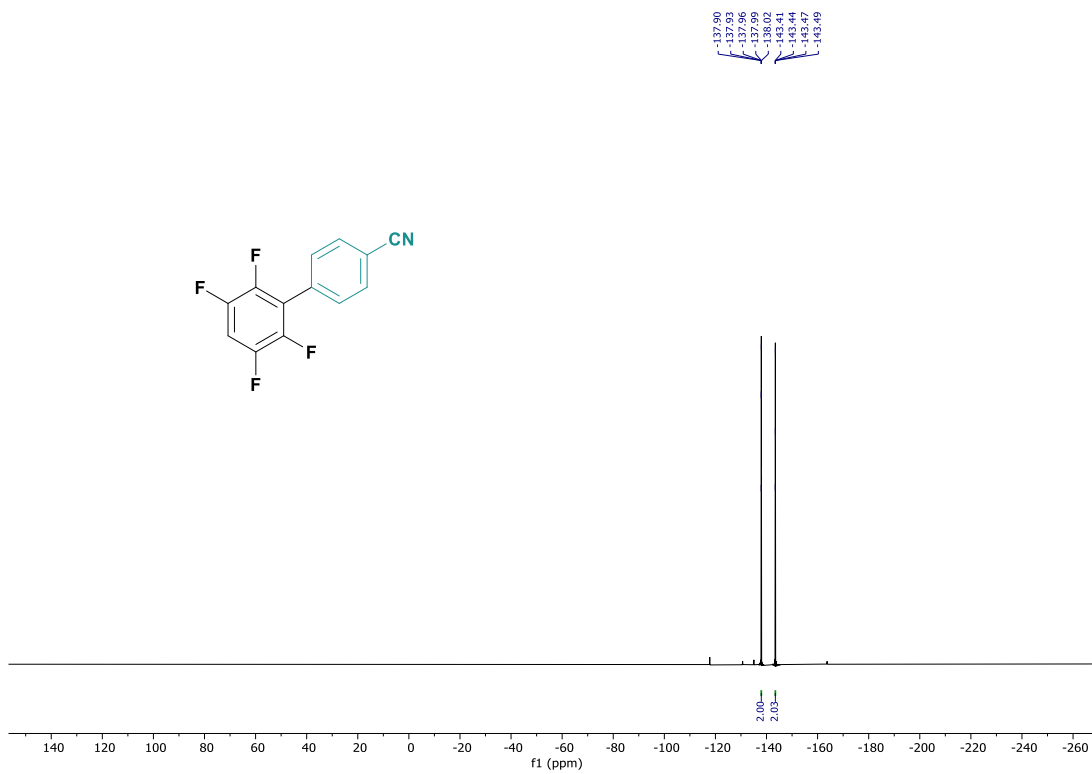

### 2,3,5,6-tetrafluoro-3'-methyl-1,1'-biphenyl (3m):

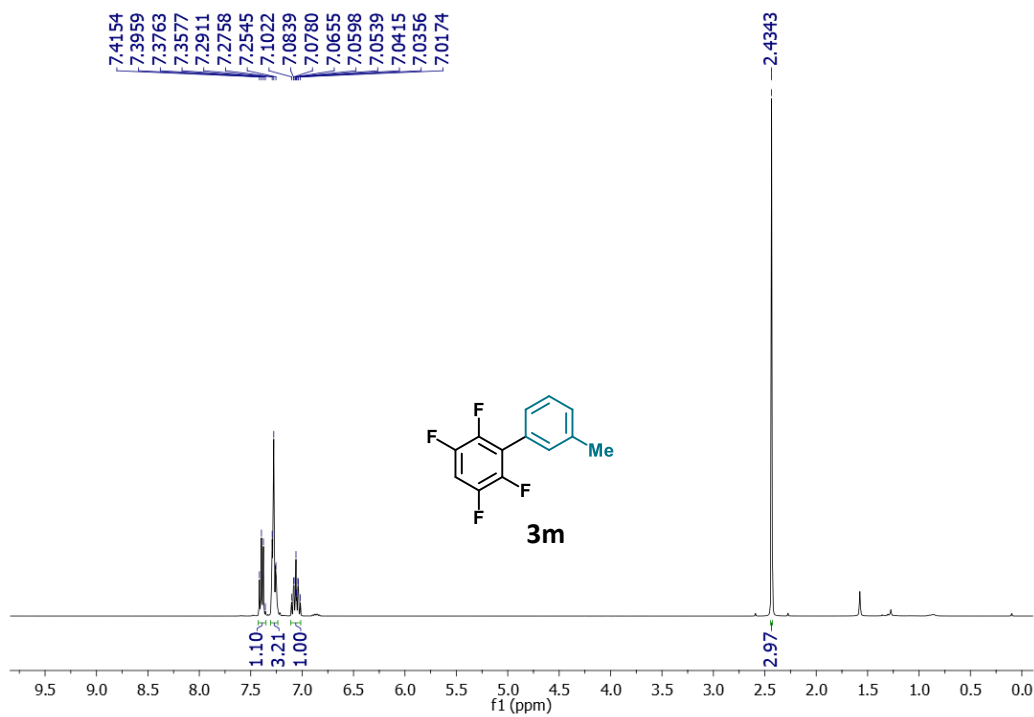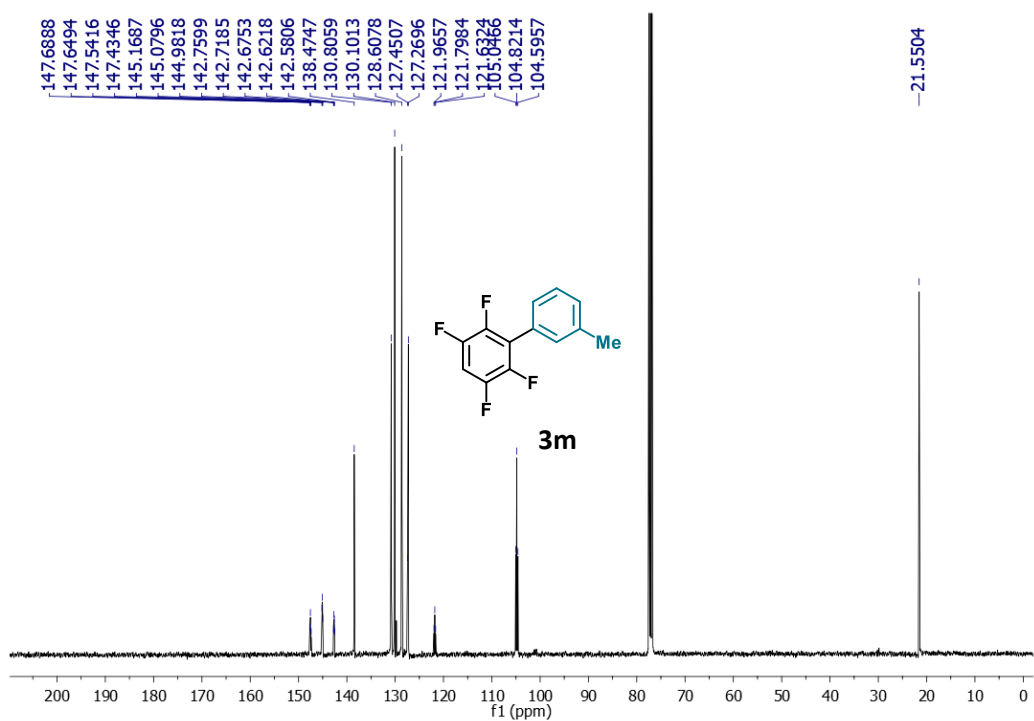

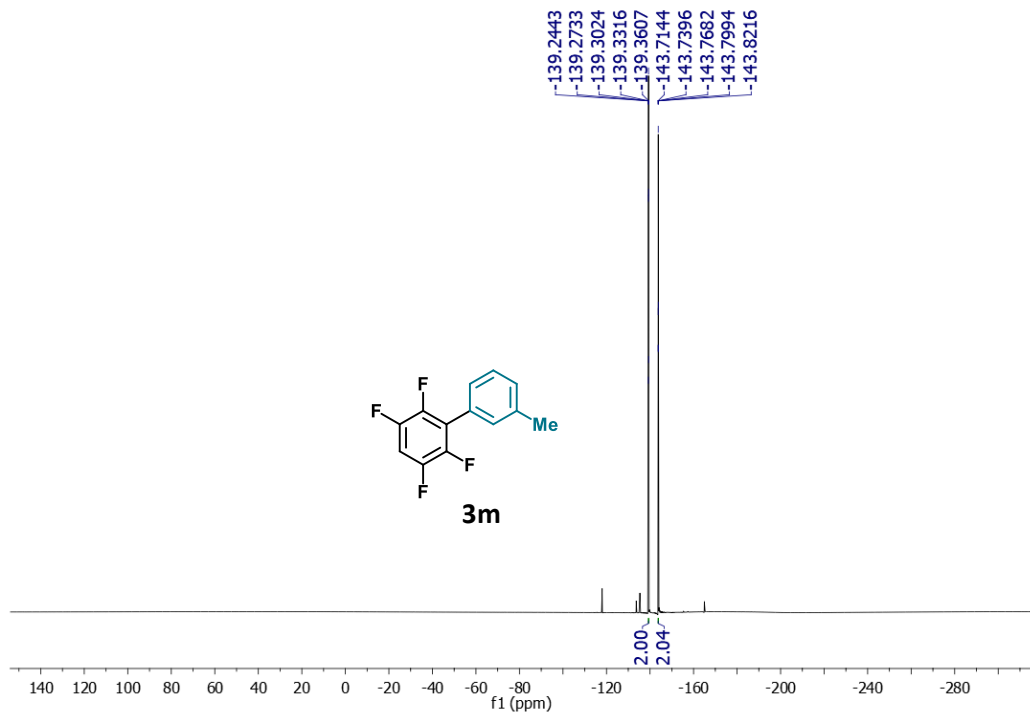

### 2,3,5,6-tetrafluoro-1,1':3',1''-terphenyl (3n):

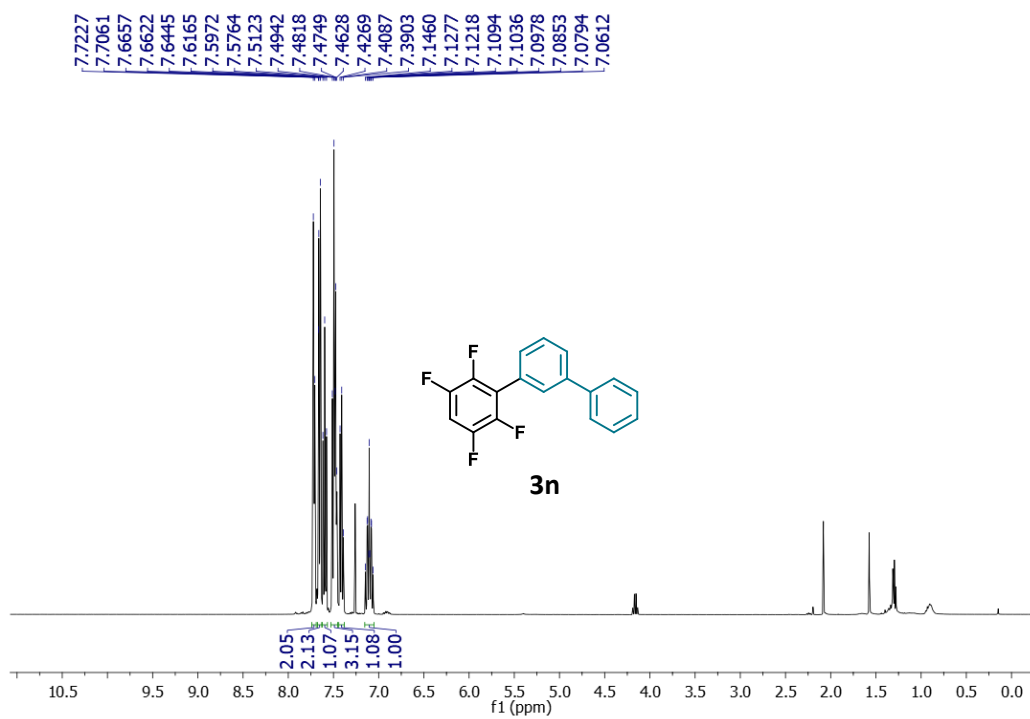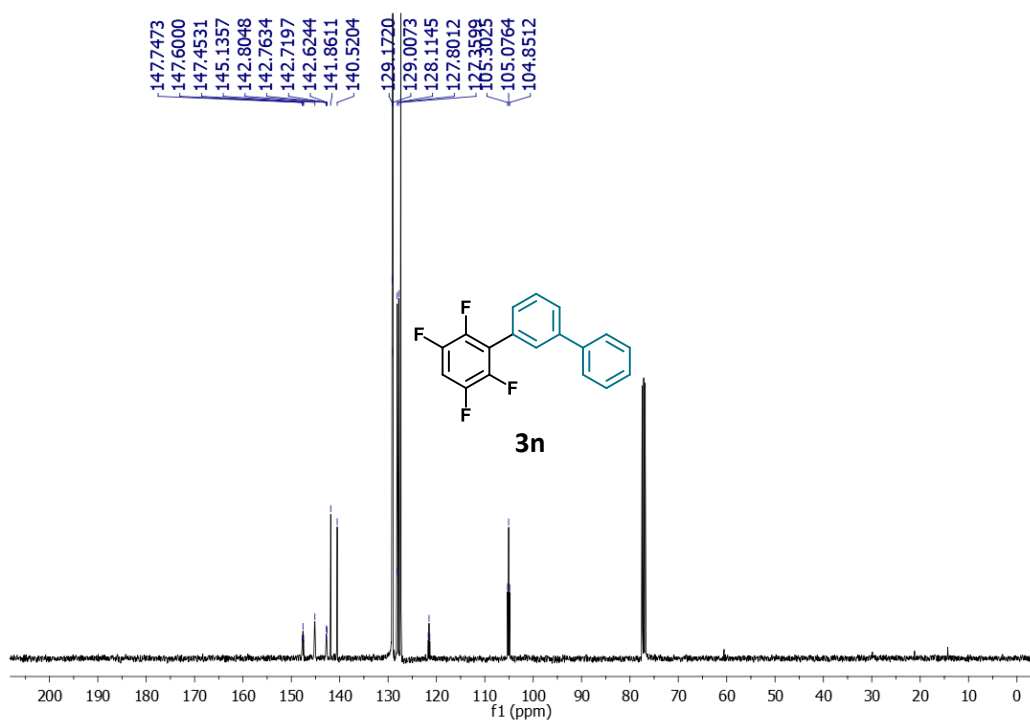

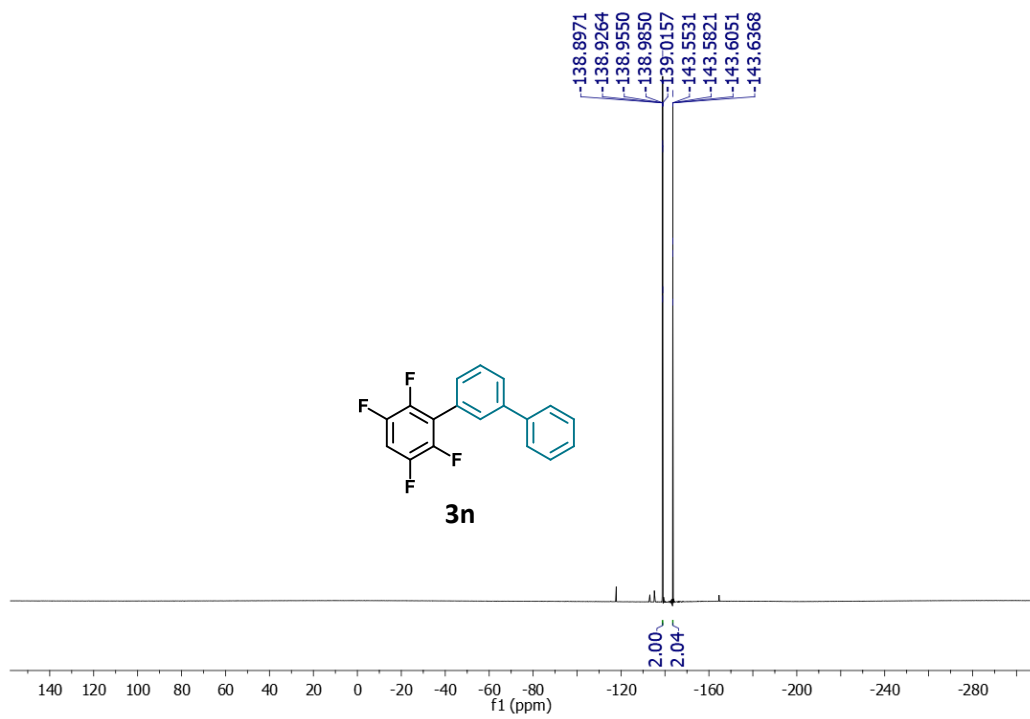

5-(2,3,5,6-tetrafluorophenyl)benzo[d][1,3]dioxole (3o):

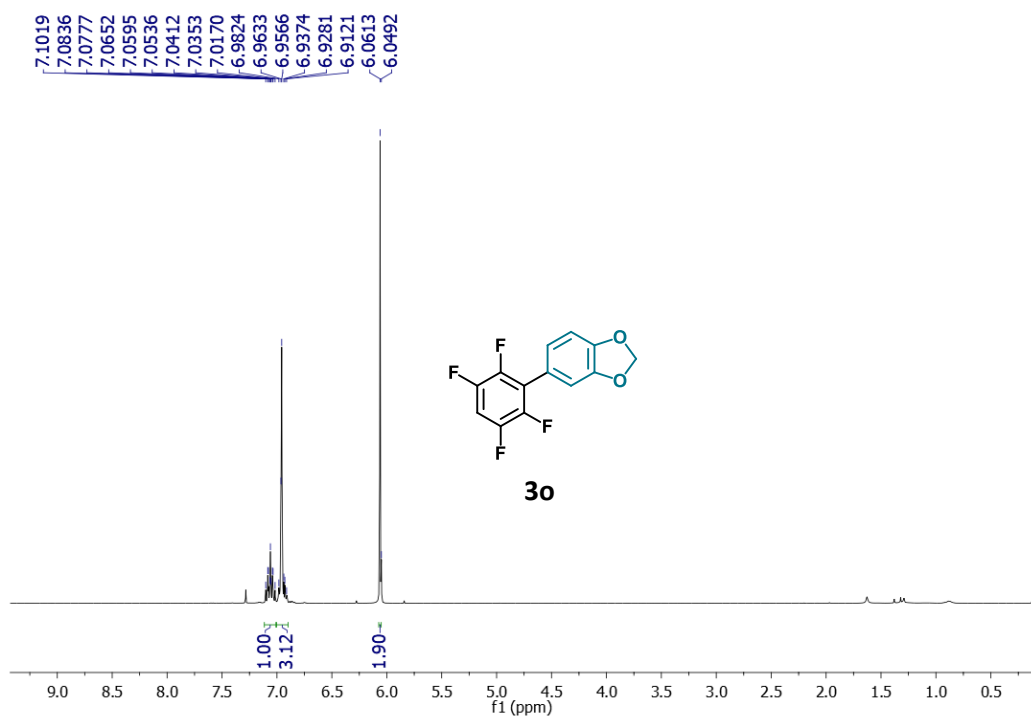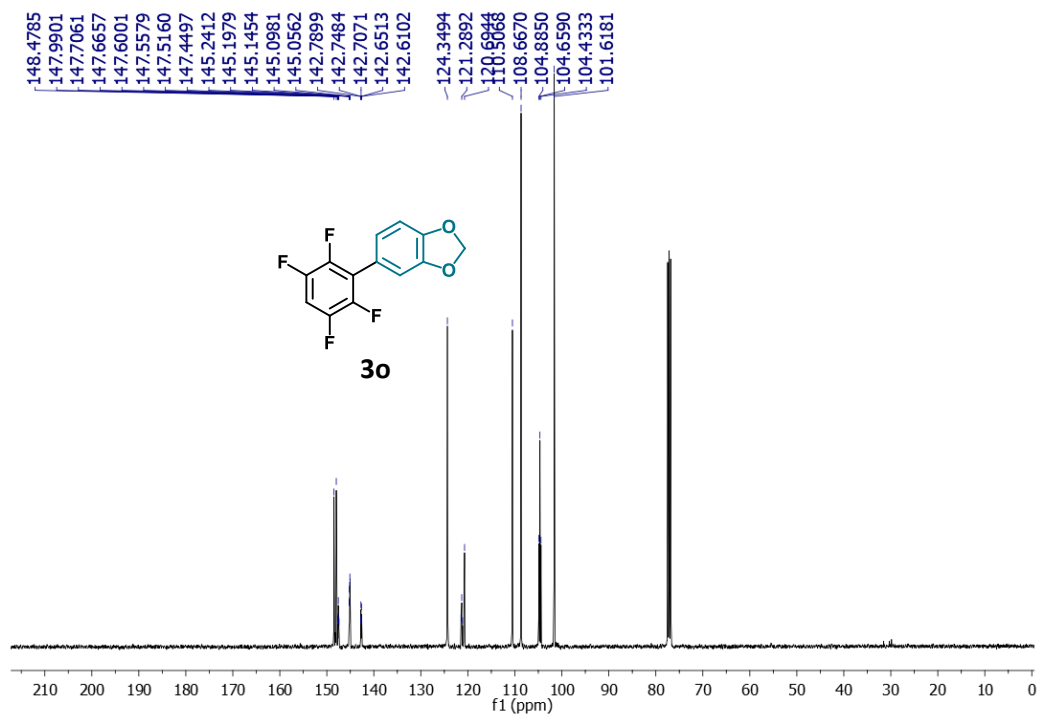

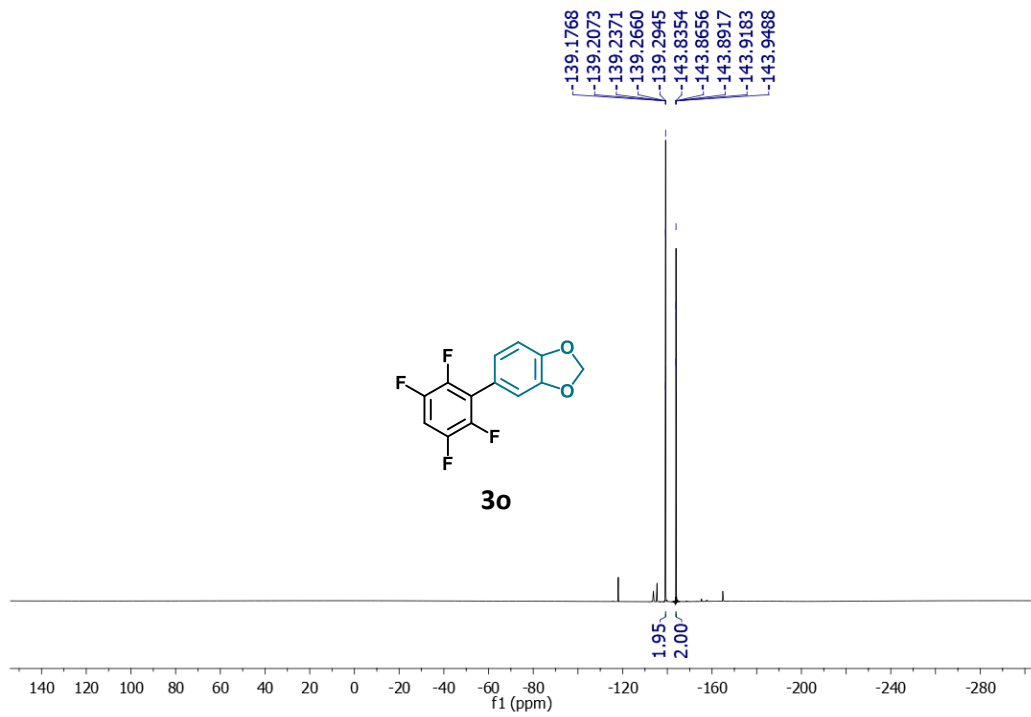

2,3,5,6-tetrafluoro-3',5'-dimethyl-1,1'-biphenyl (3p):

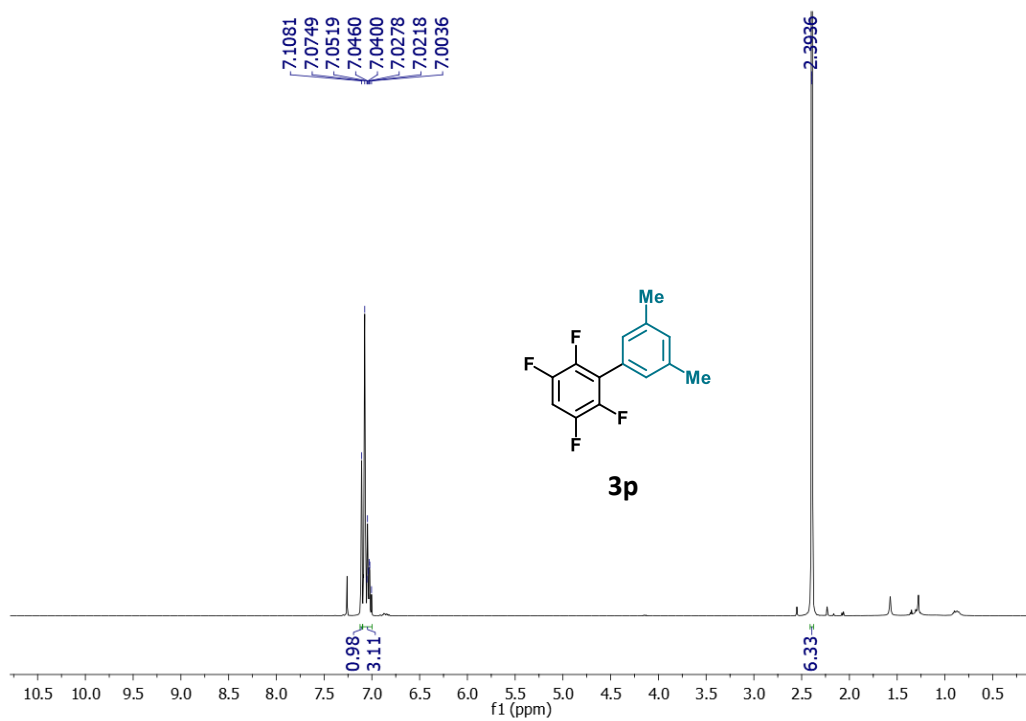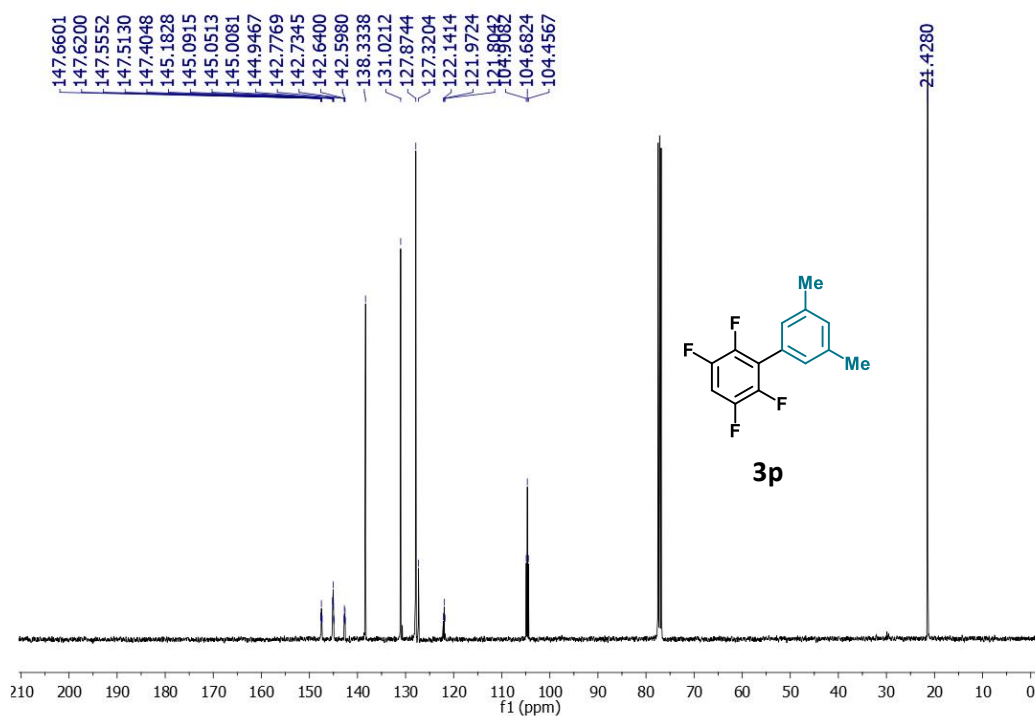

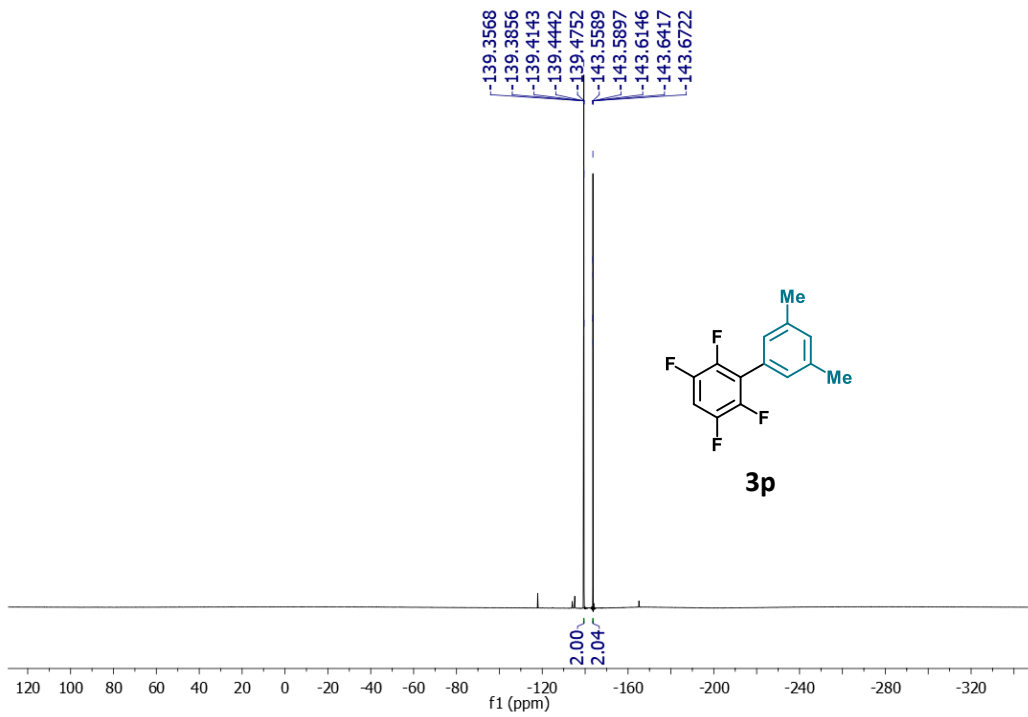

### 2,3,5,6-tetrafluoro-3',5'-dimethoxy-1,1'-biphenyl (3q):

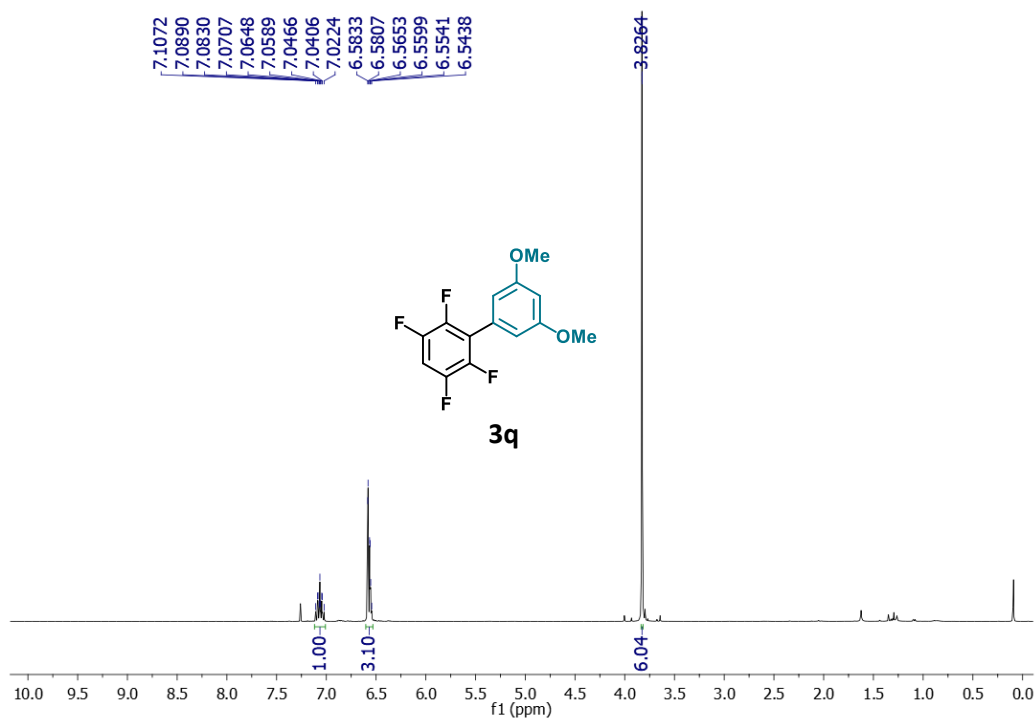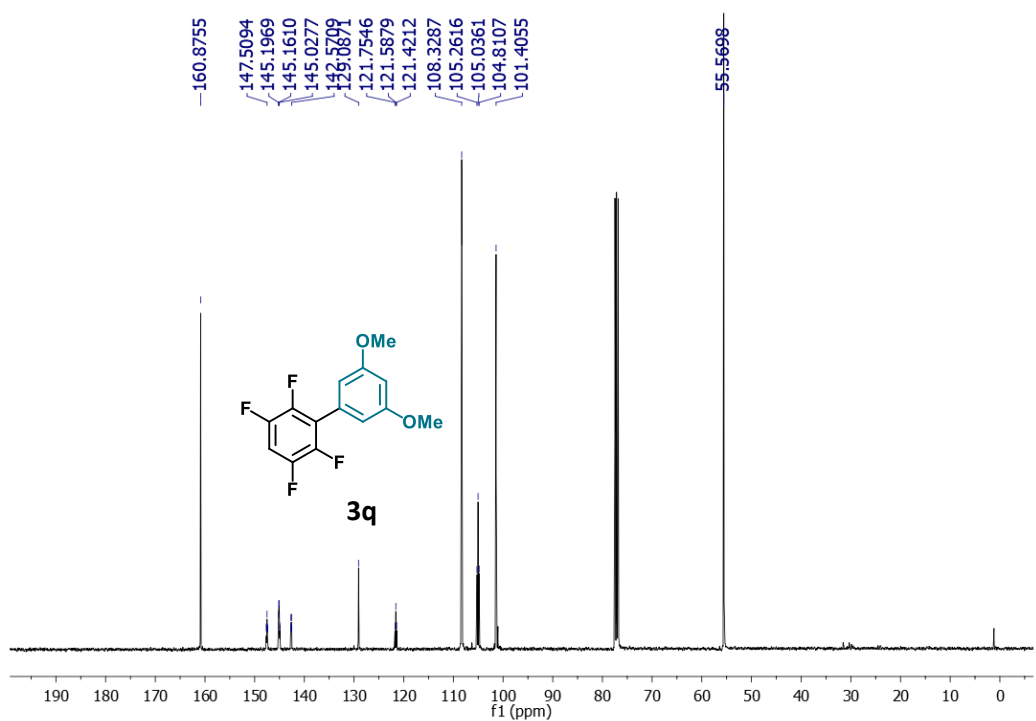

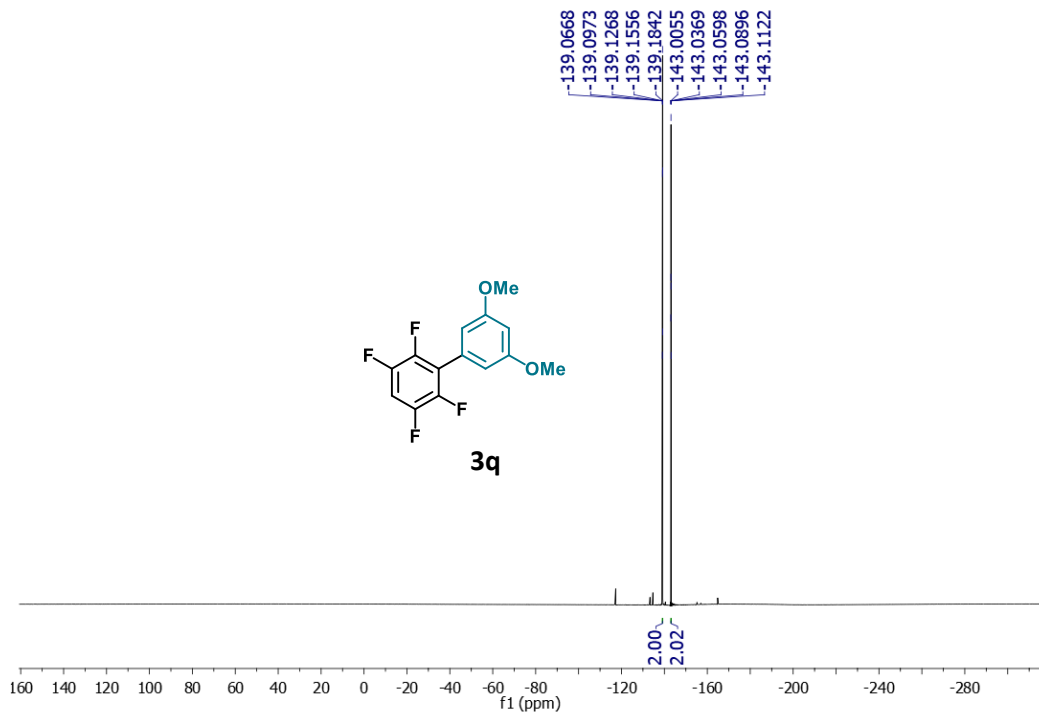

2,3,5,6-tetrafluoro-4'-methoxy-3',5'-dimethyl-1,1'-biphenyl (3r):

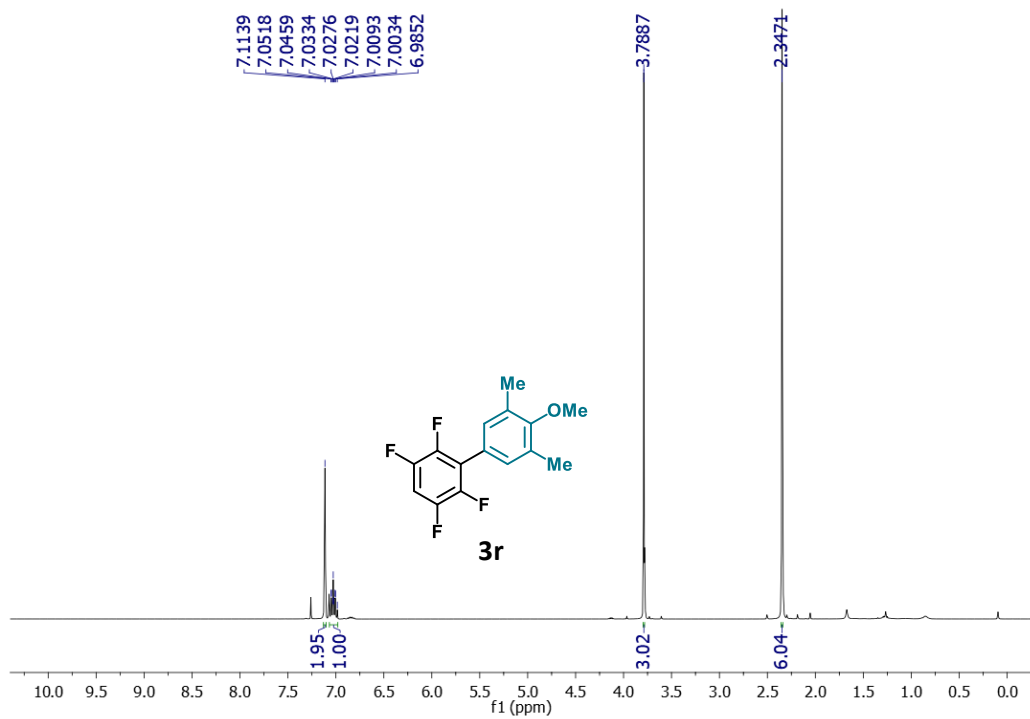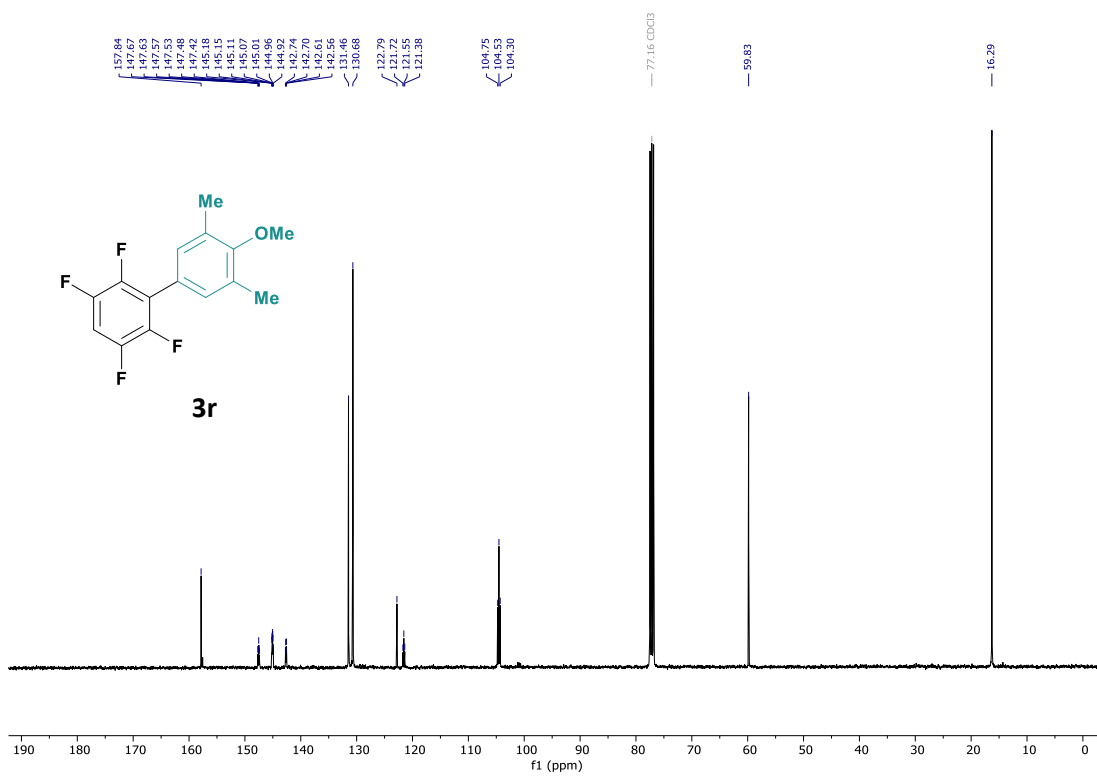

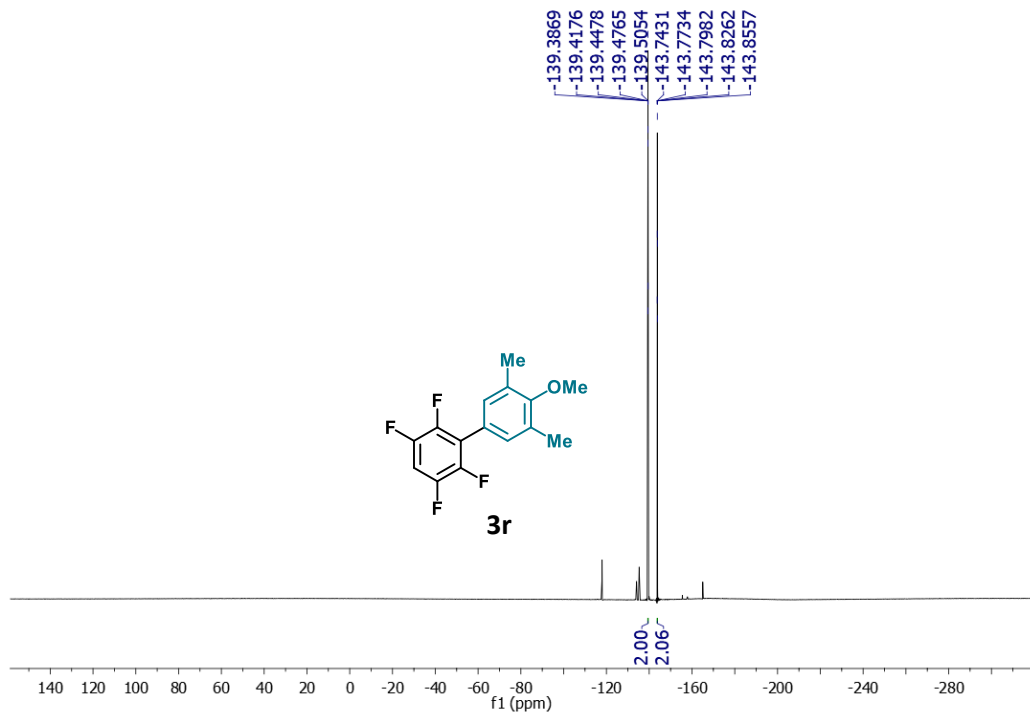

**3o**

### 2,3,5,6-tetrafluoro-3',4',5'-trimethoxy-1,1'-biphenyl (3s):

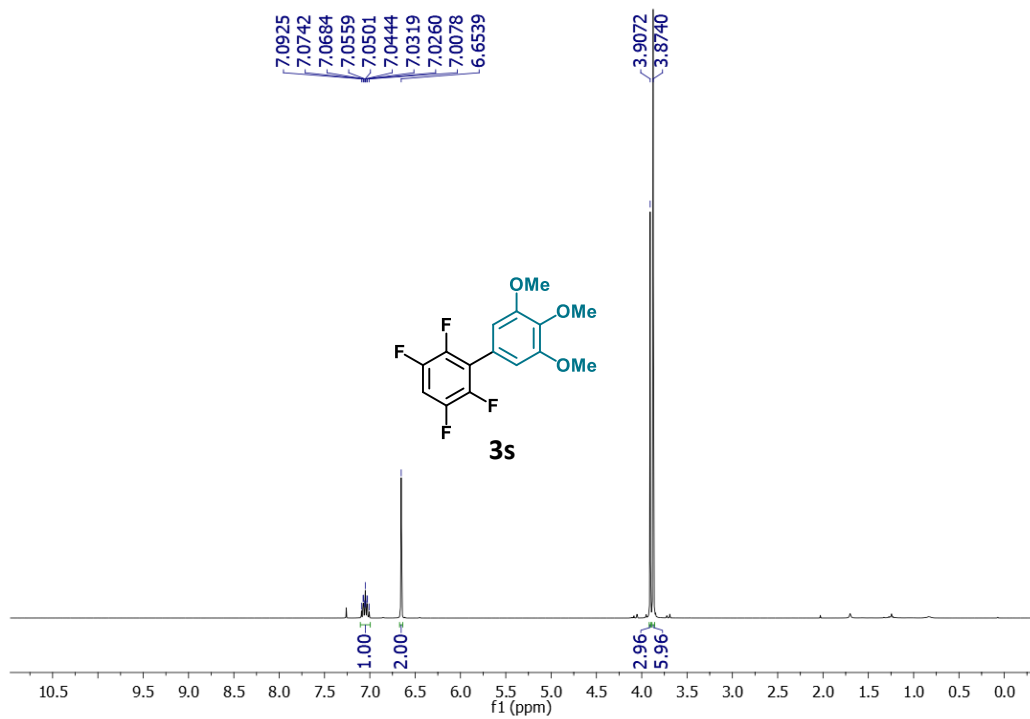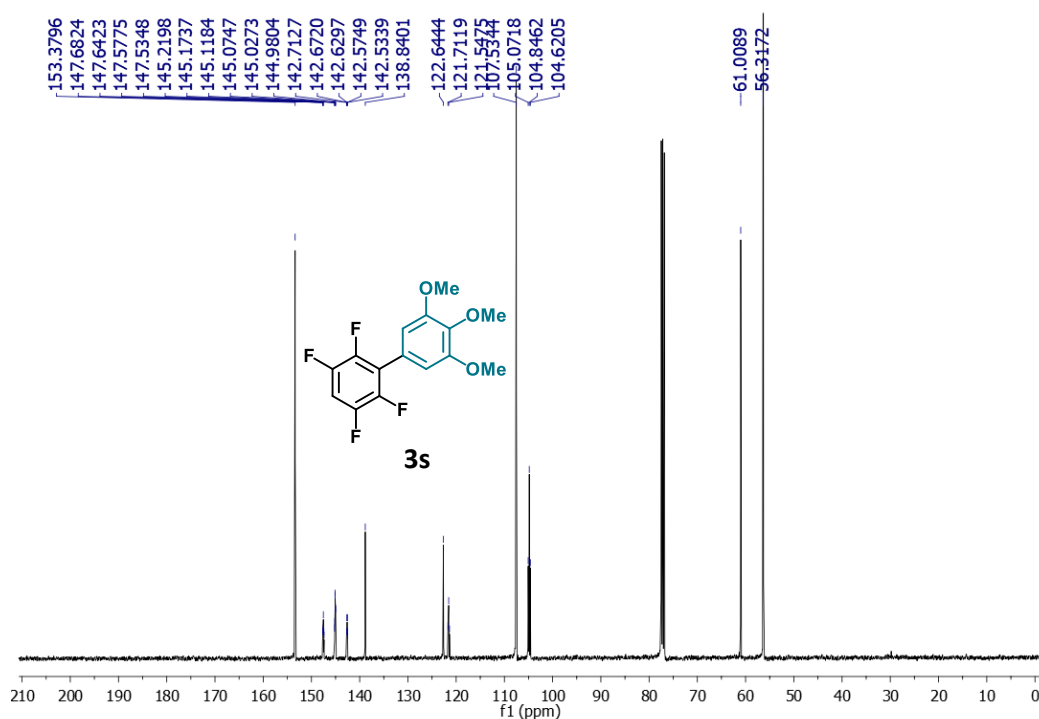

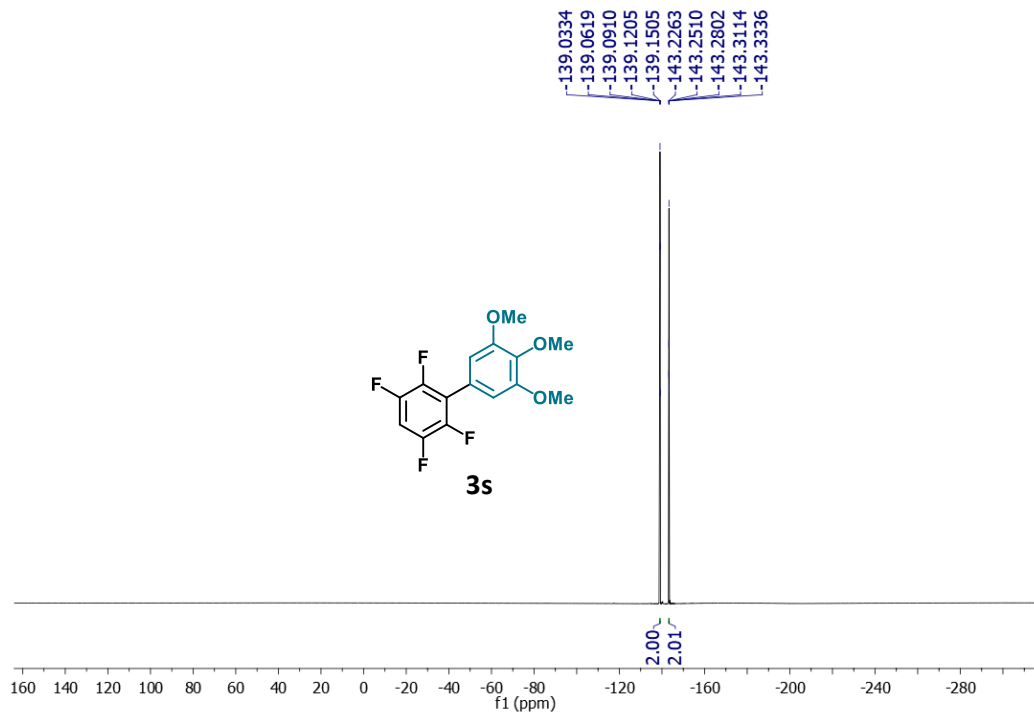

## 2-fluoro-1,1'-biphenyl (3t):

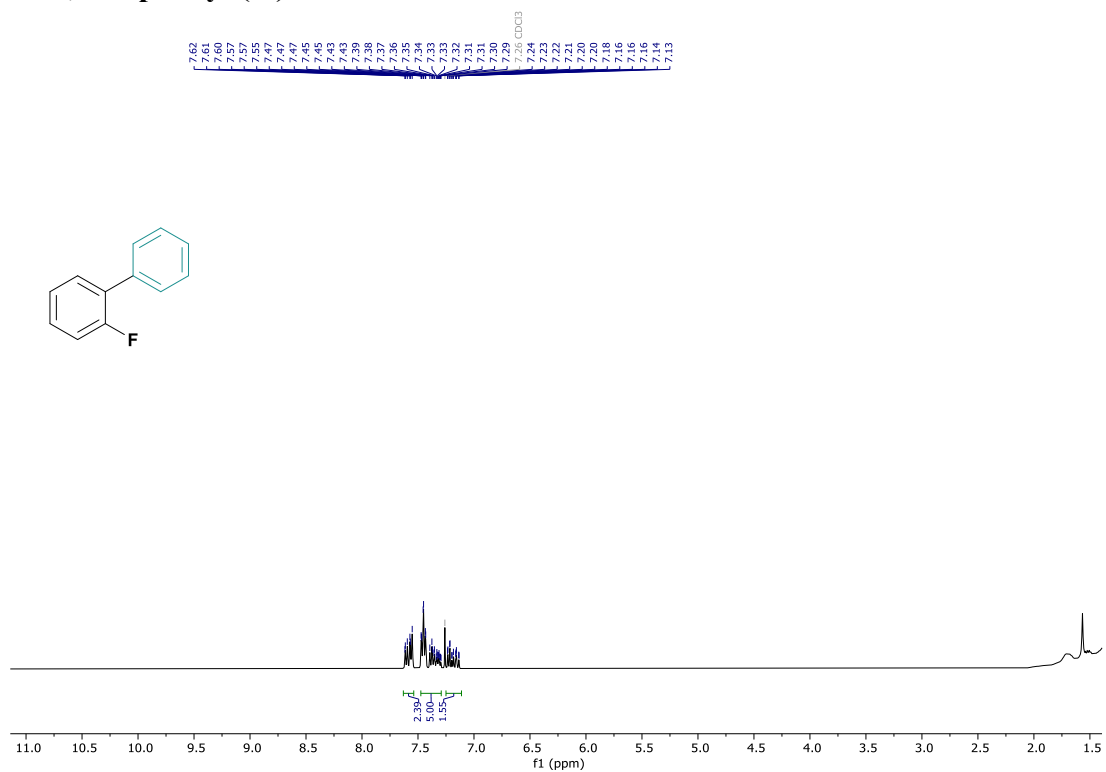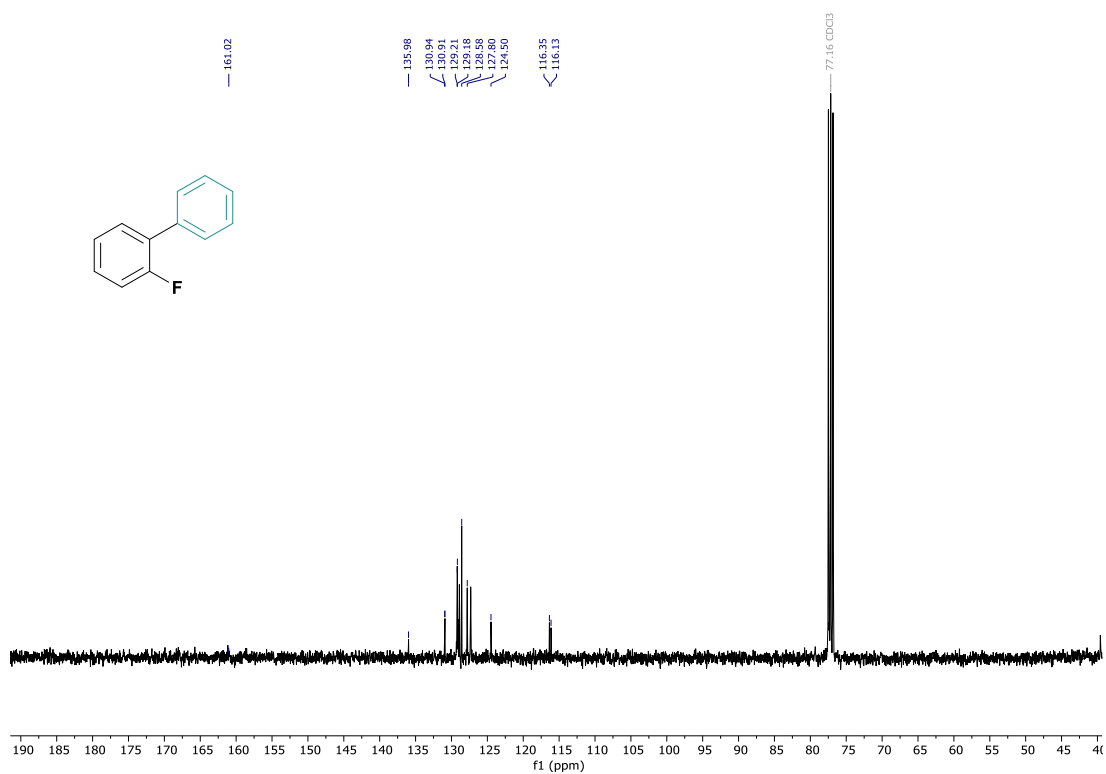

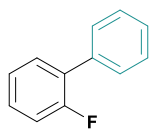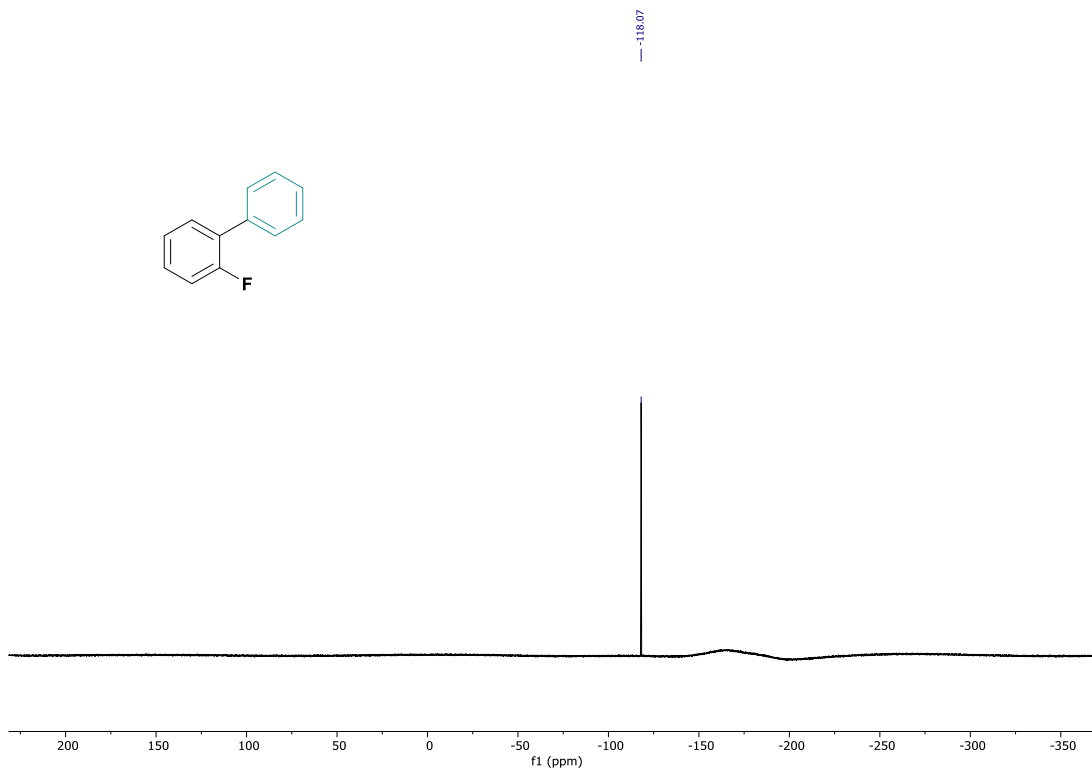

2,3,6-trifluoro-4'-methoxy-3',5'-dimethyl-1,1'-biphenyl (3u):

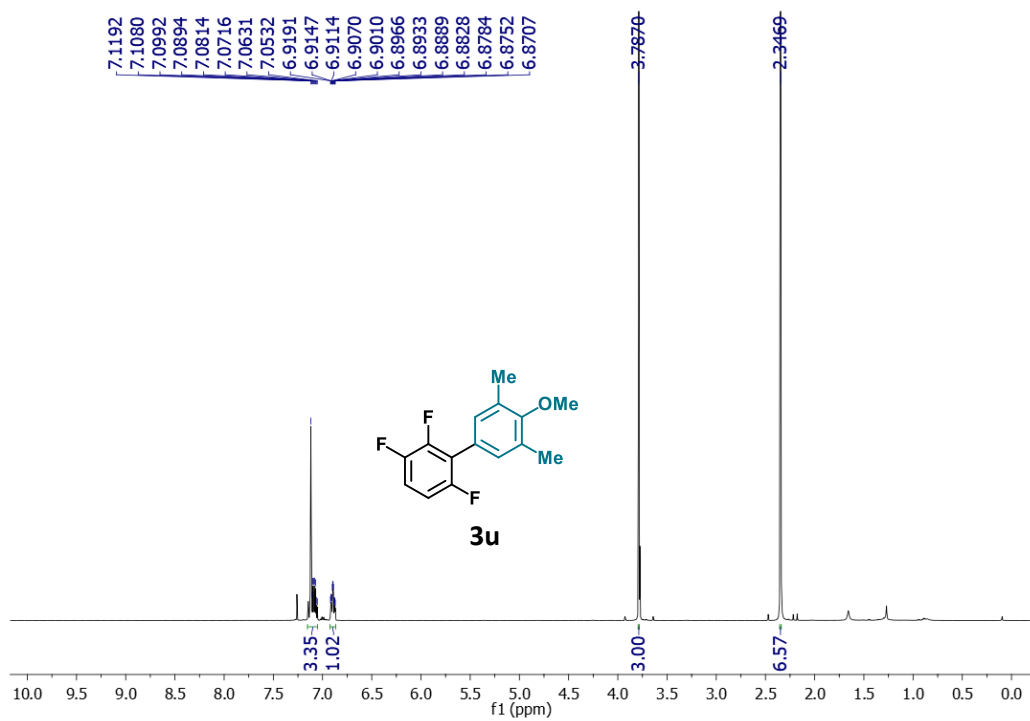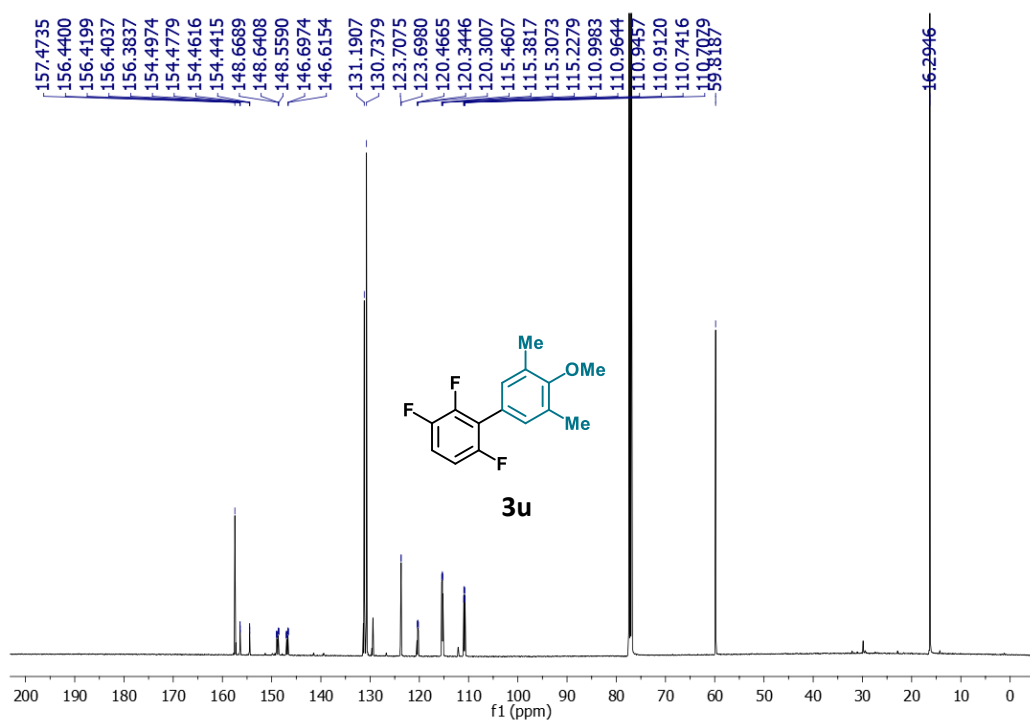

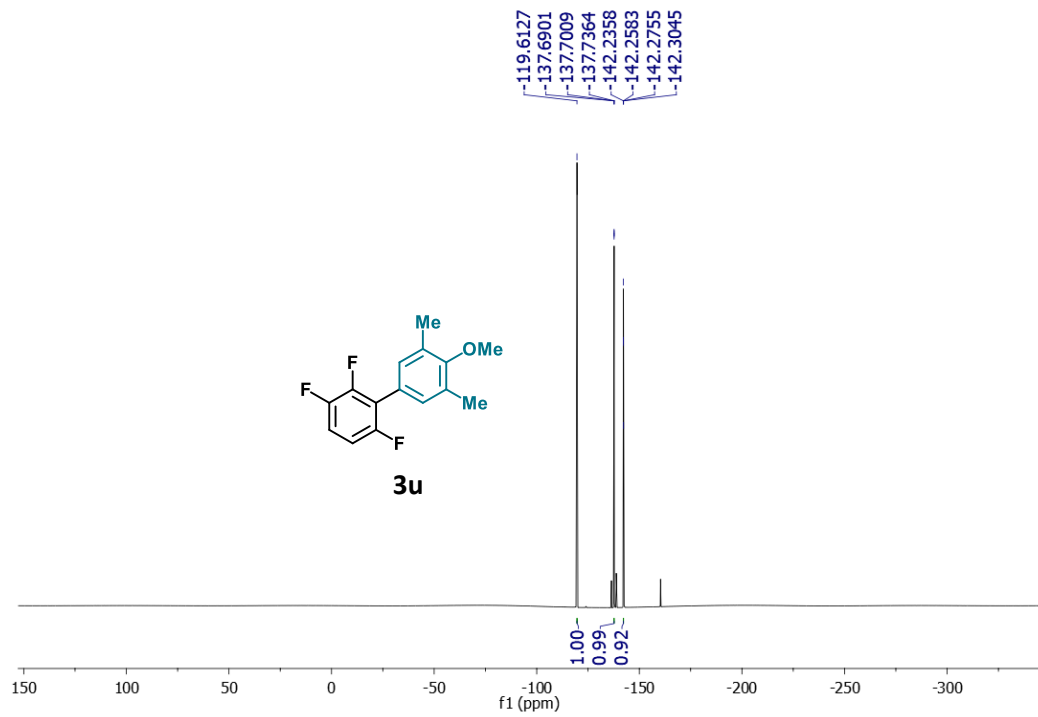

### 2,6-difluoro-3',5'-dimethoxy-[1,1'-biphenyl]-4-carbonitrile (3v):

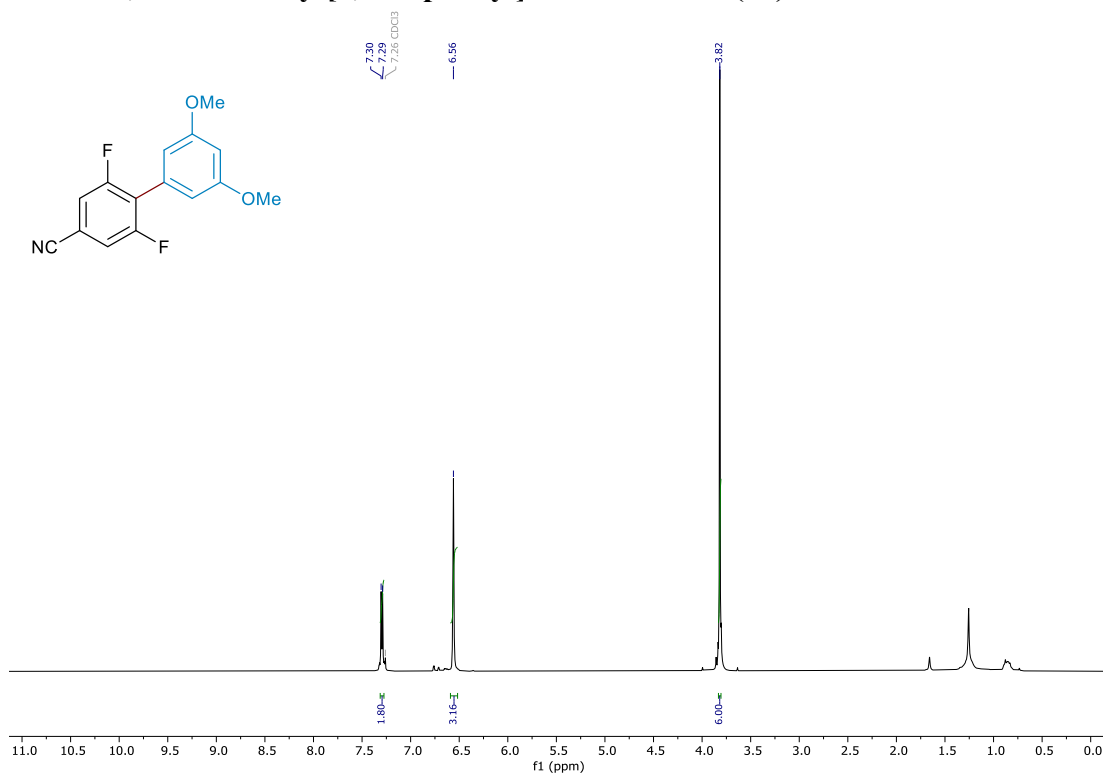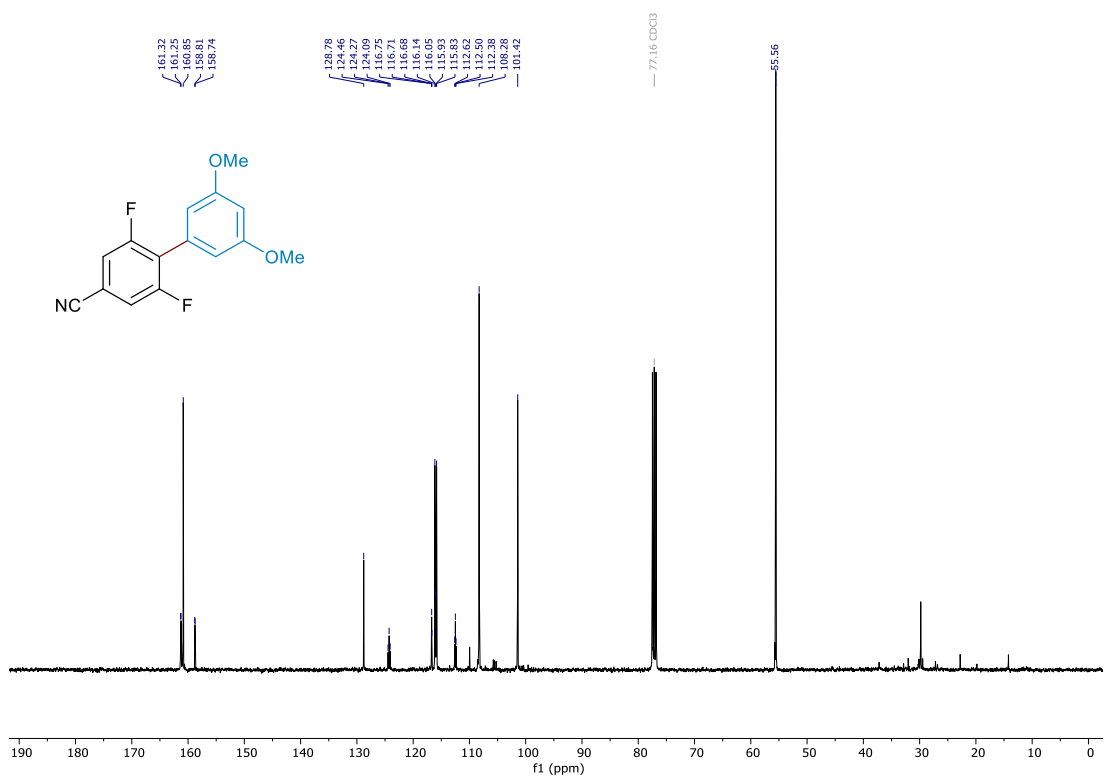

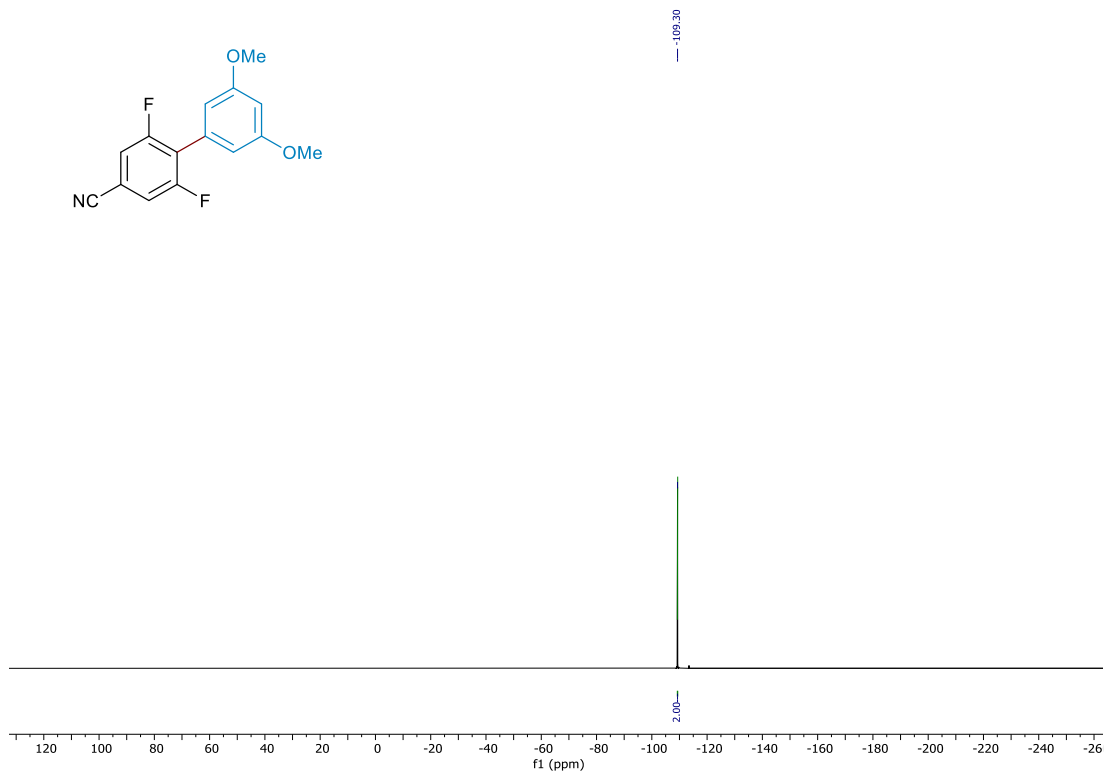

2,6-difluoro-4'-methoxy-3',5'-dimethyl-[1,1'-biphenyl]-4-carbonitrile (**3w**):

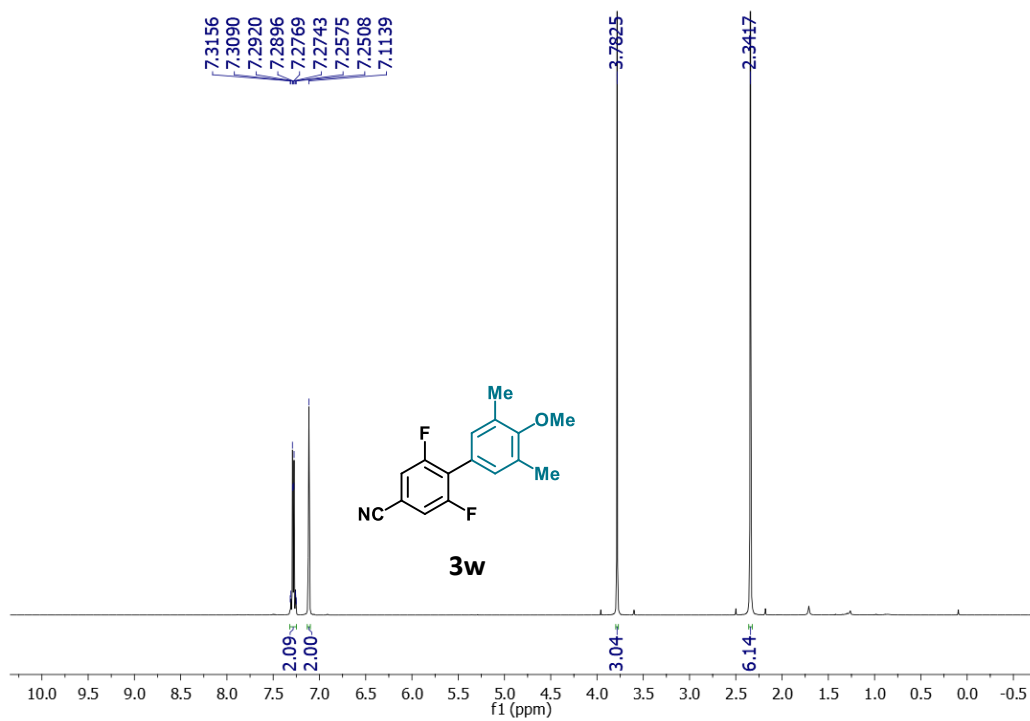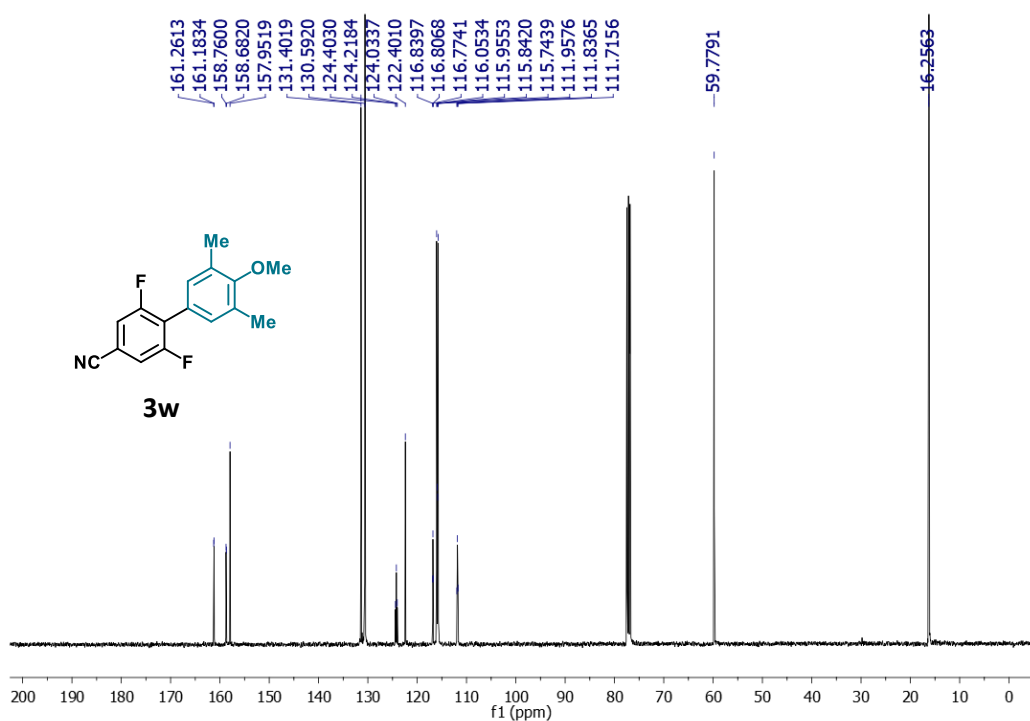

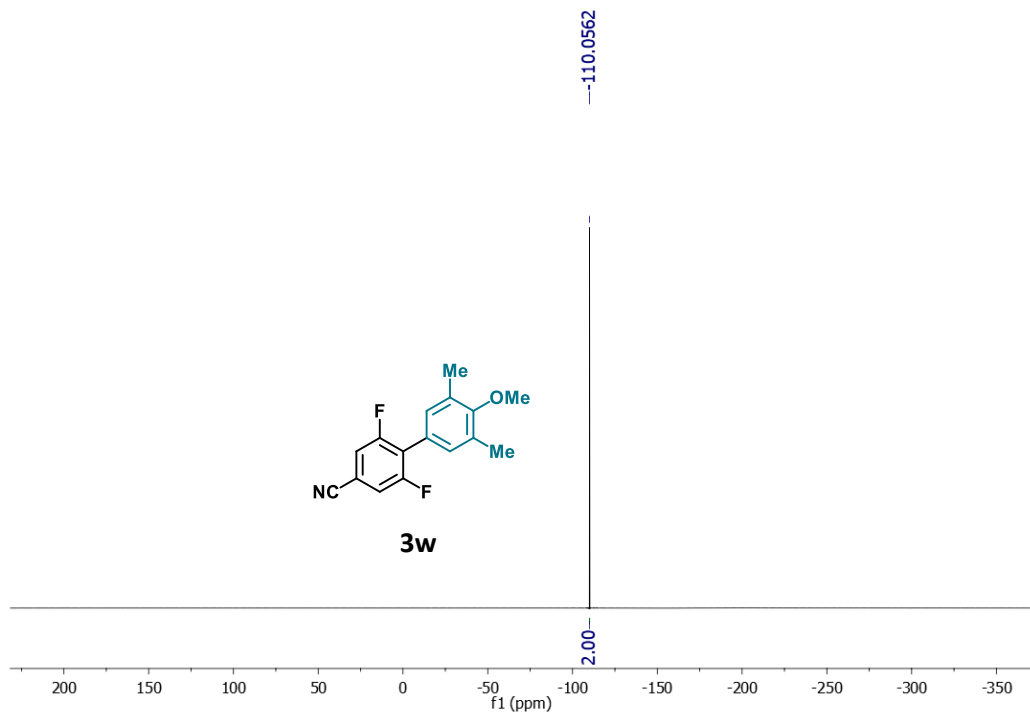

### 2,3,5,6-tetrafluoro-3',5'-dimethoxy-4-(trifluoromethyl)-1,1'-biphenyl (3x):

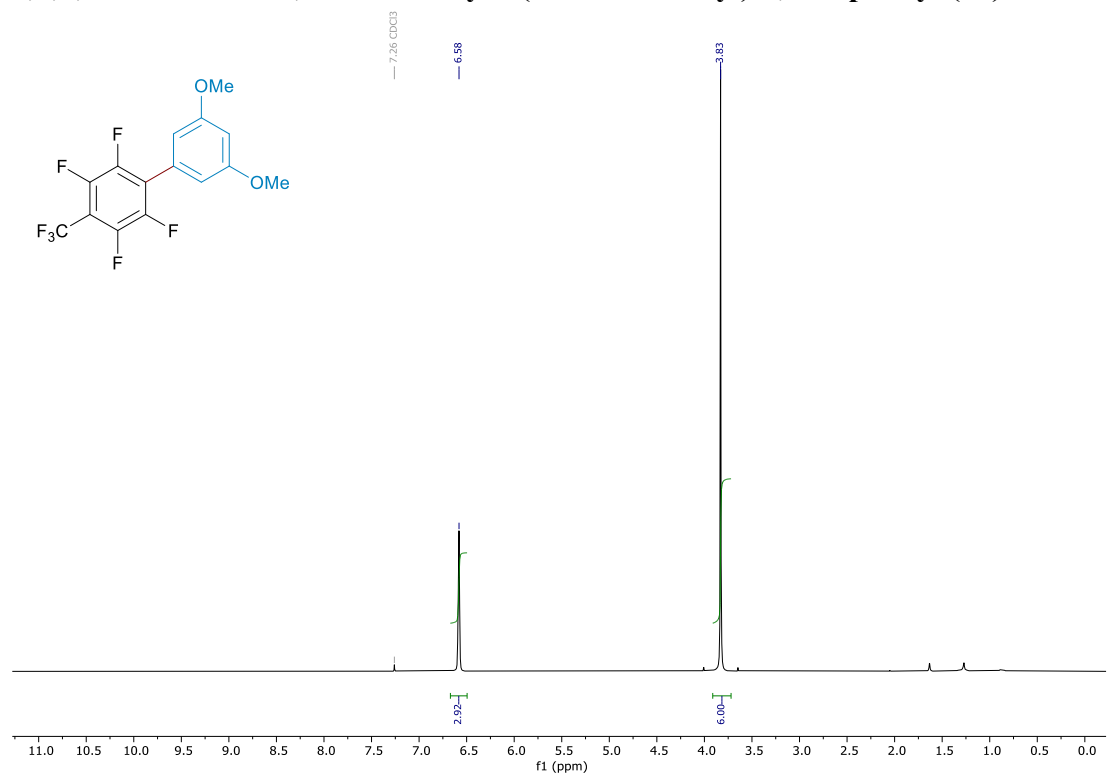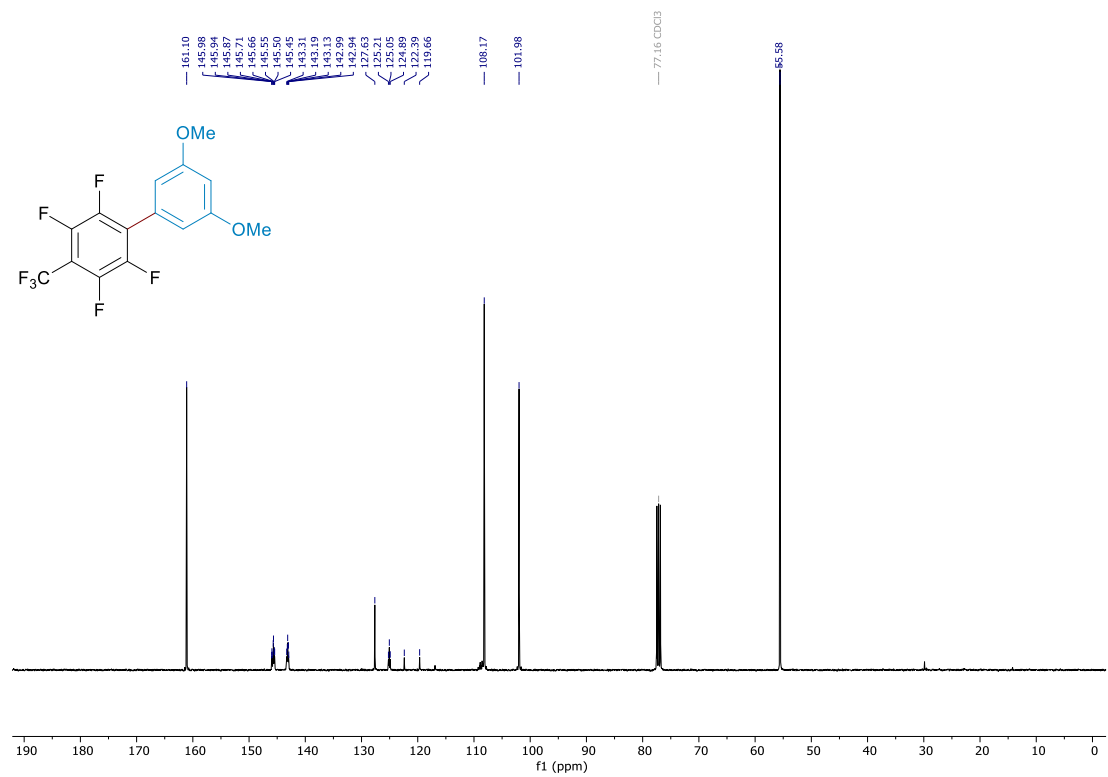

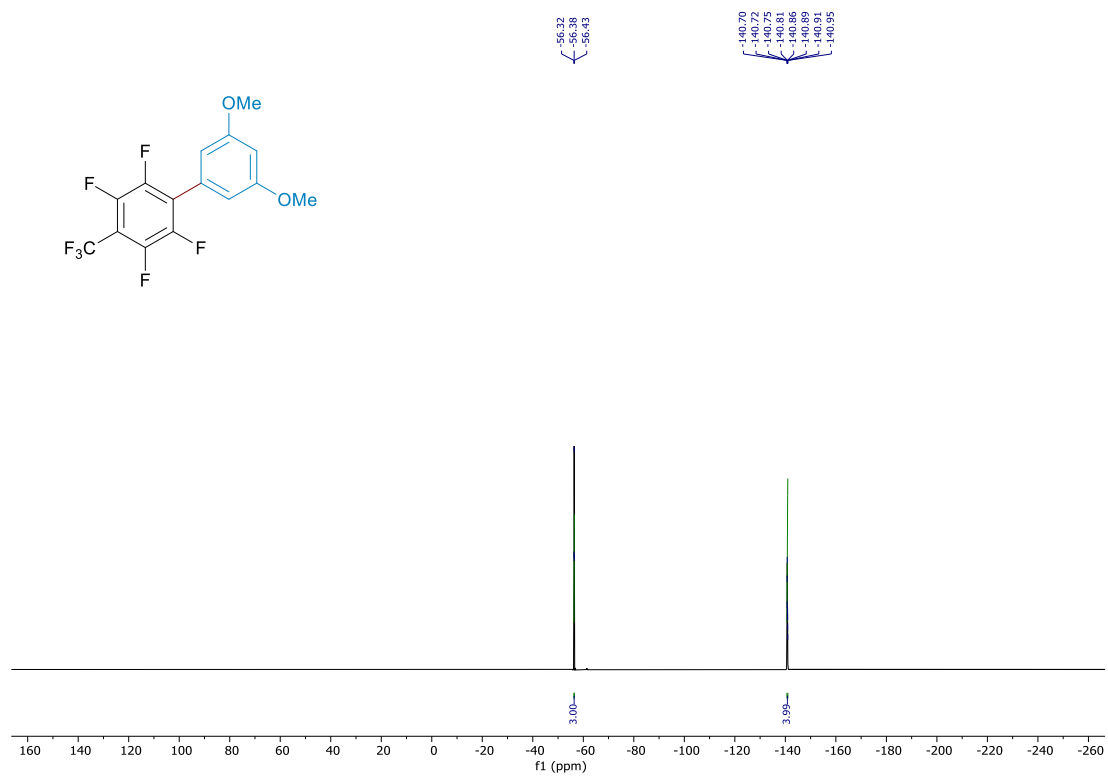

# 4-(3,5-dimethoxyphenyl)-2,3,5,6-tetrafluoropyridine (3y):

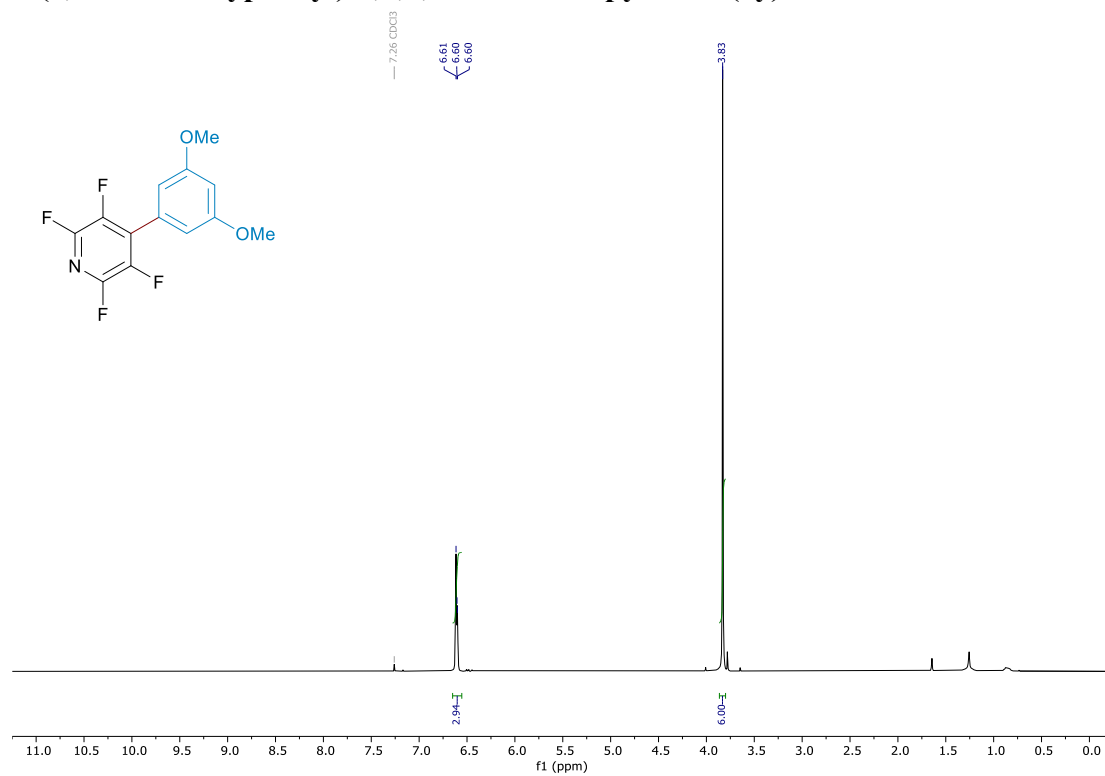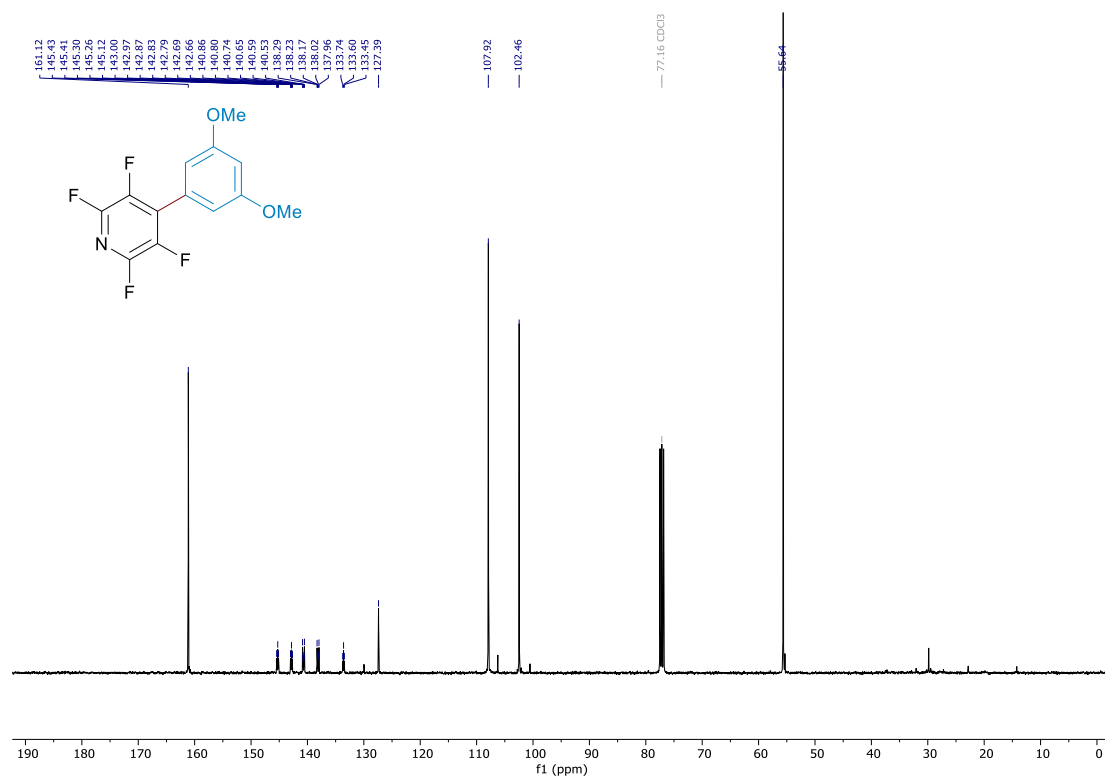

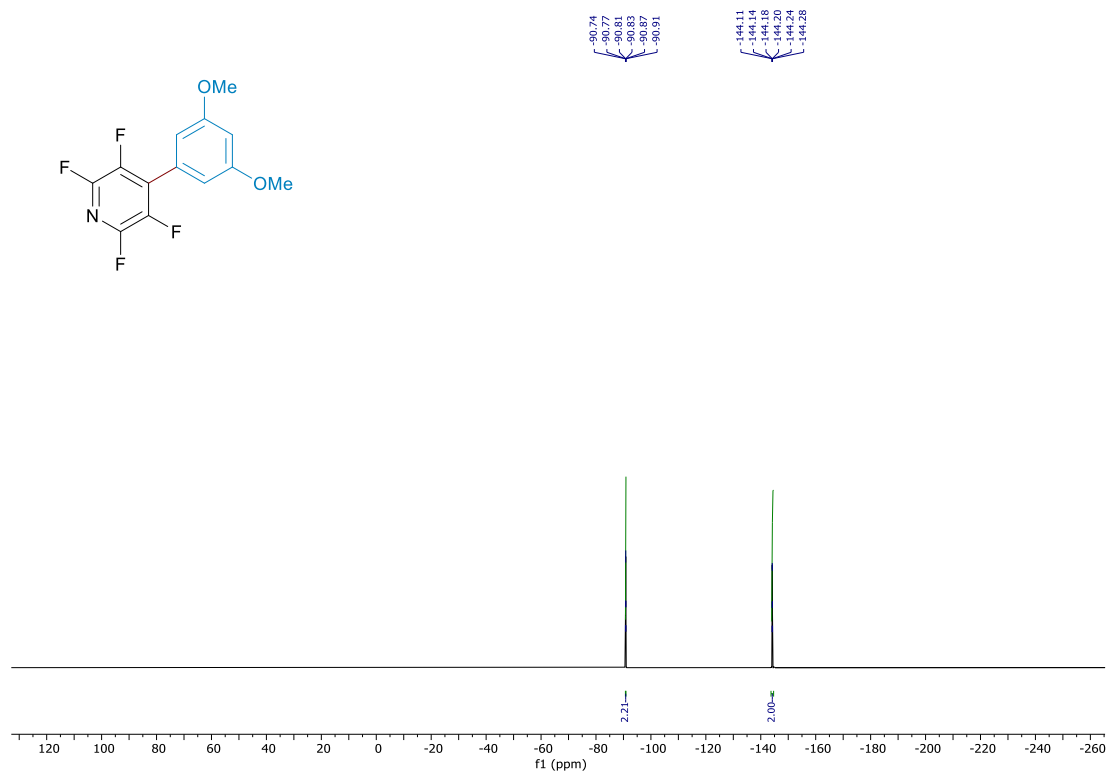

2,3,5,6-tetrafluoro-4-(4-methoxy-3,5-dimethylphenyl)pyridine (**3z**):

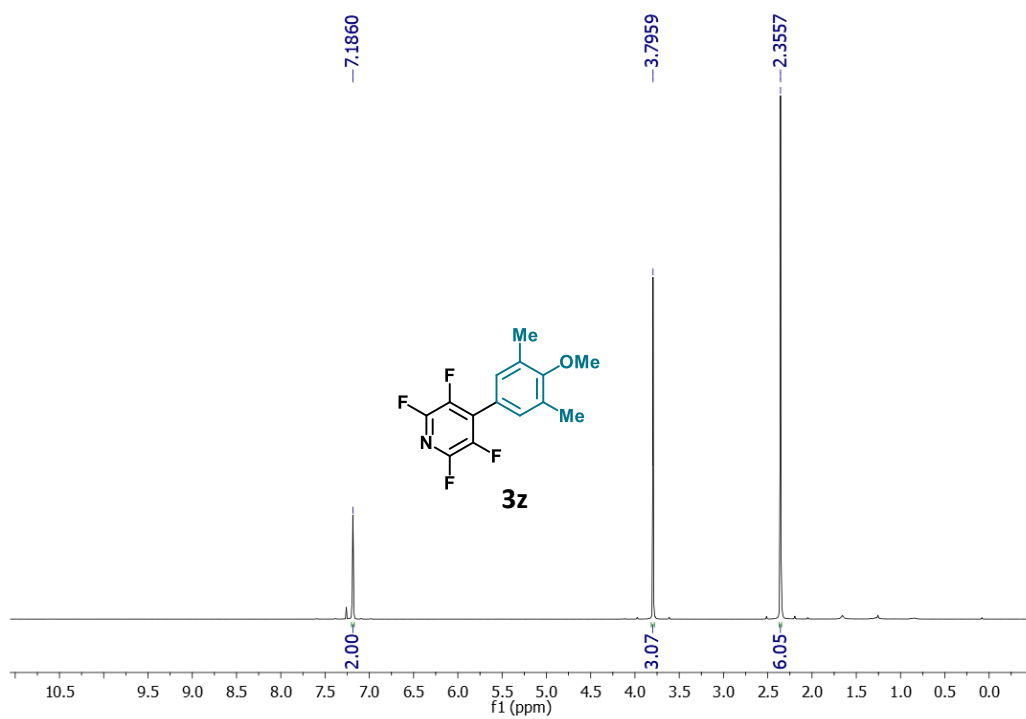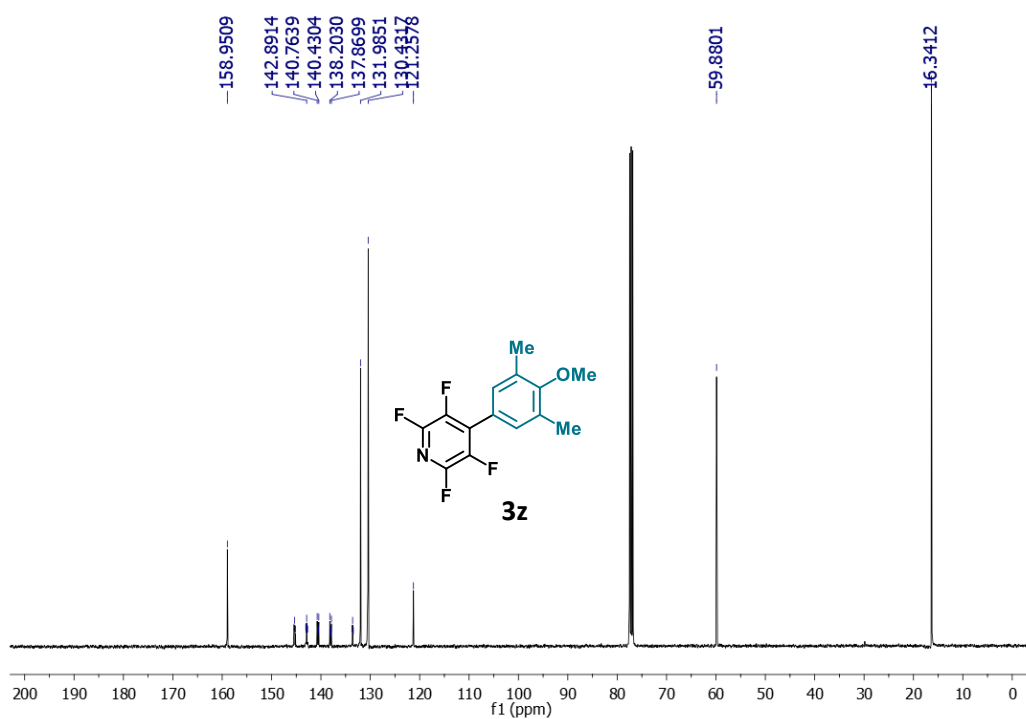

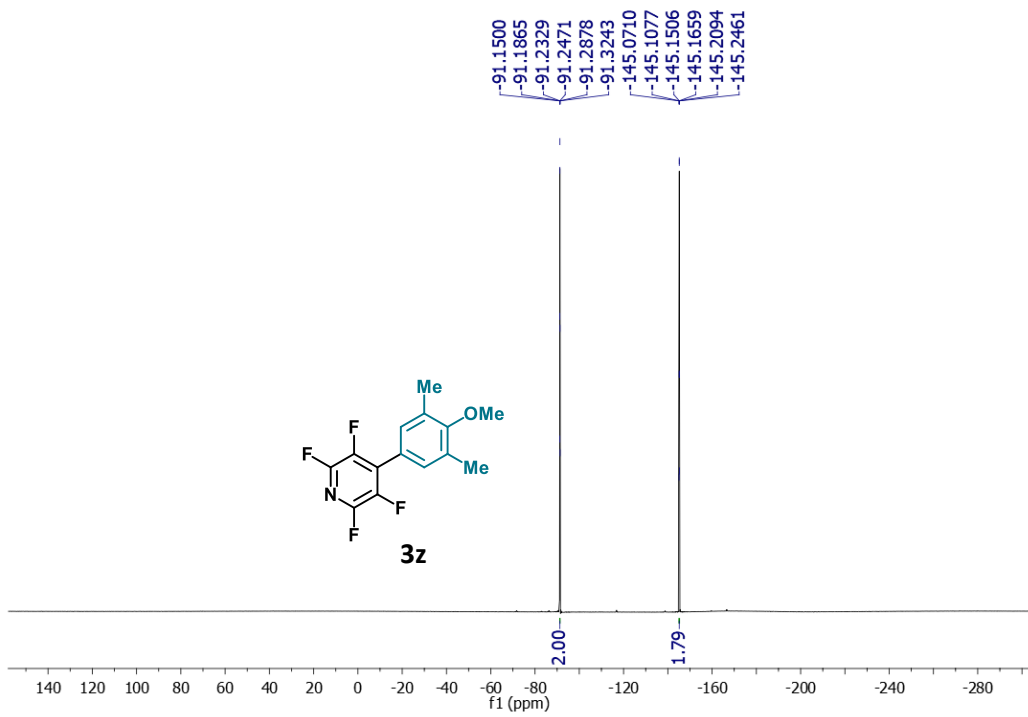

**2',2'',3',3'',5',5'',6',6''-Octafluoro-4,4'''-dimethoxy-3,3''',5,5'''-tetramethyl-1,1':4',1'':4'',1'''-quaterphenyl (3aa):**

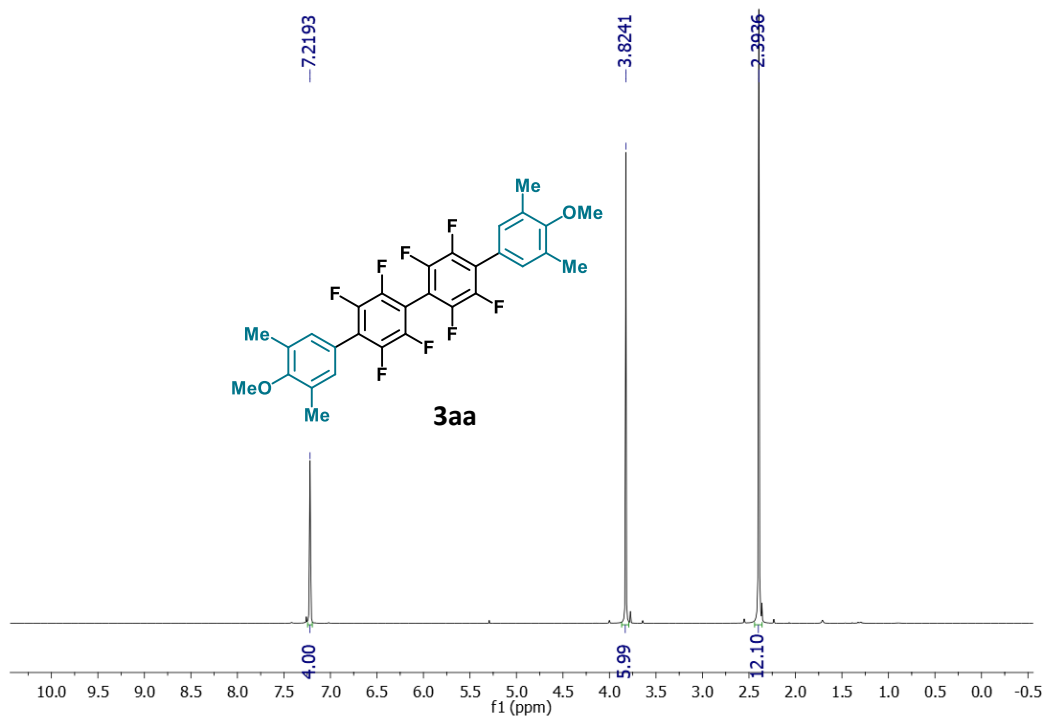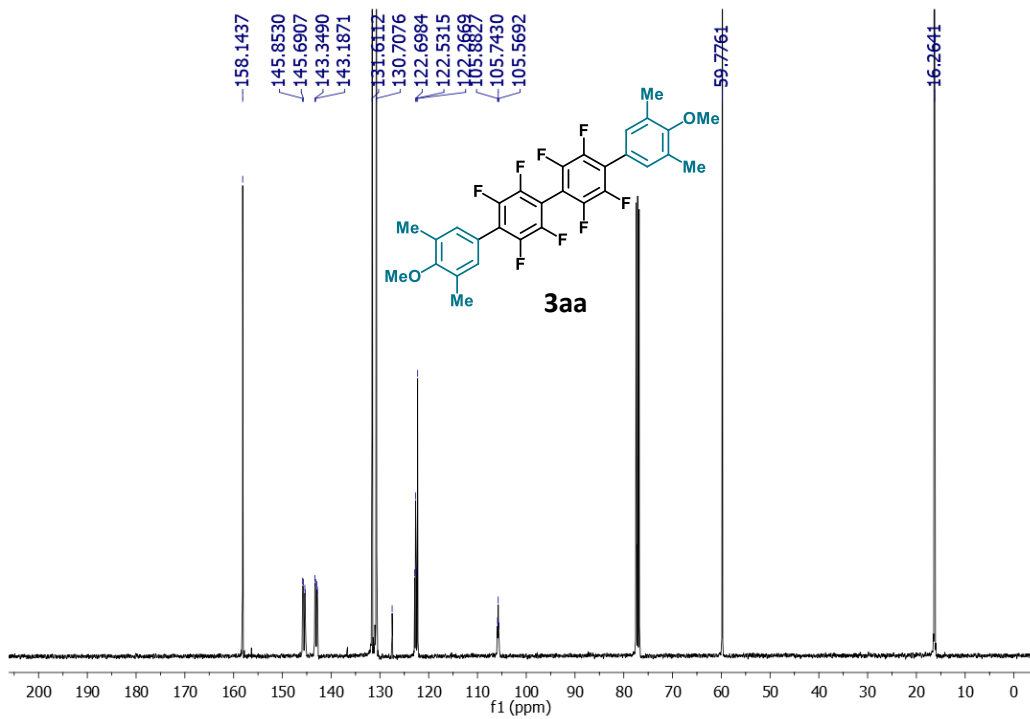

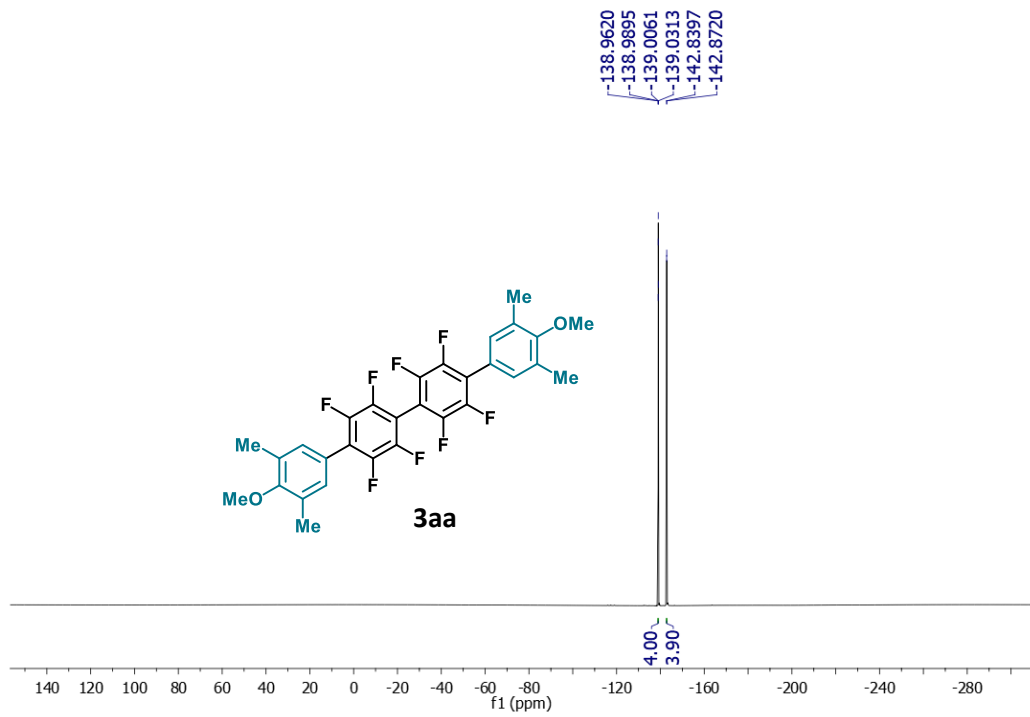

**Methyl 2',5',6'-trifluoro-4,4''-dimethoxy-3,3'',5,5''-tetramethyl-[1,1':3',1''-terphenyl]-4'-carboxylate (3ab):**

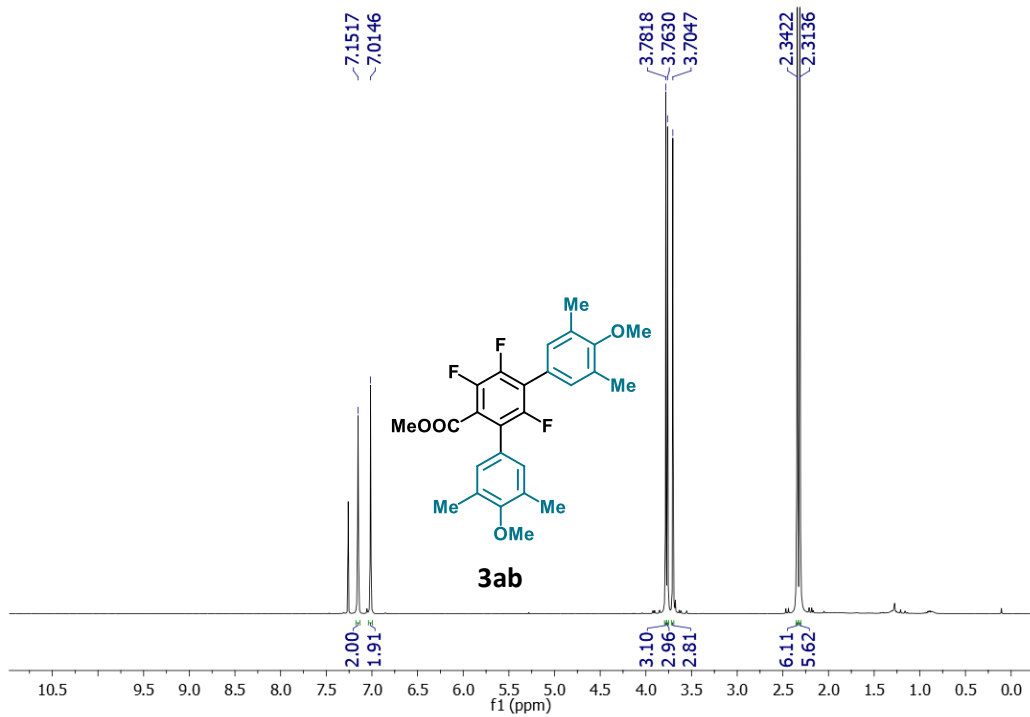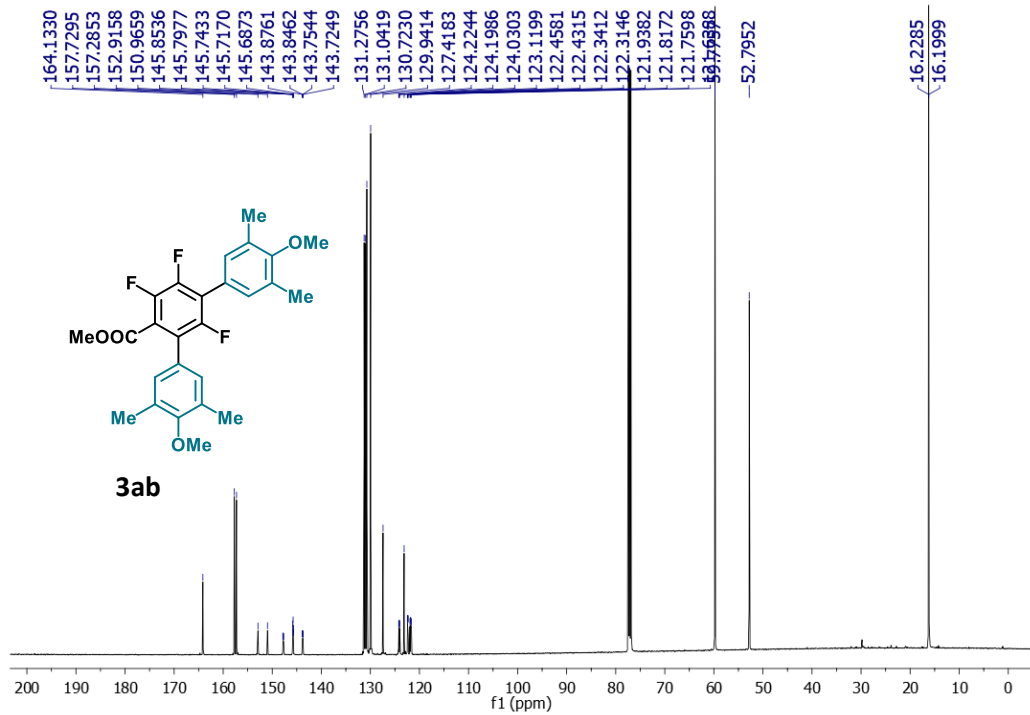

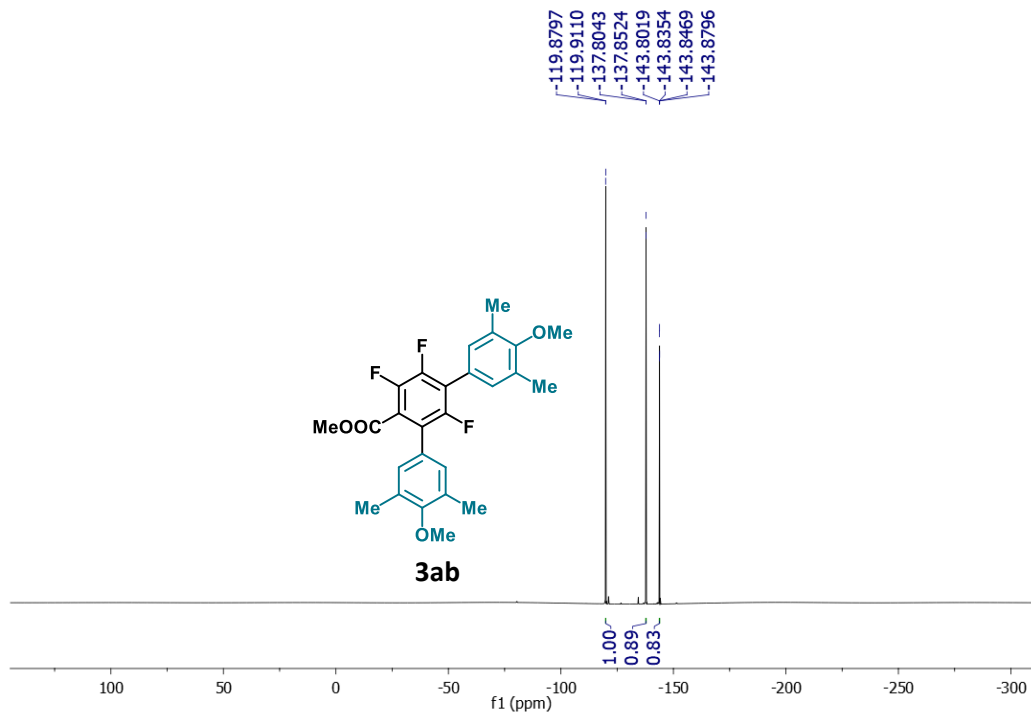

4'-(*tert*-butyl)-2,3-difluoro-6-nitro-1,1'-biphenyl (4a):

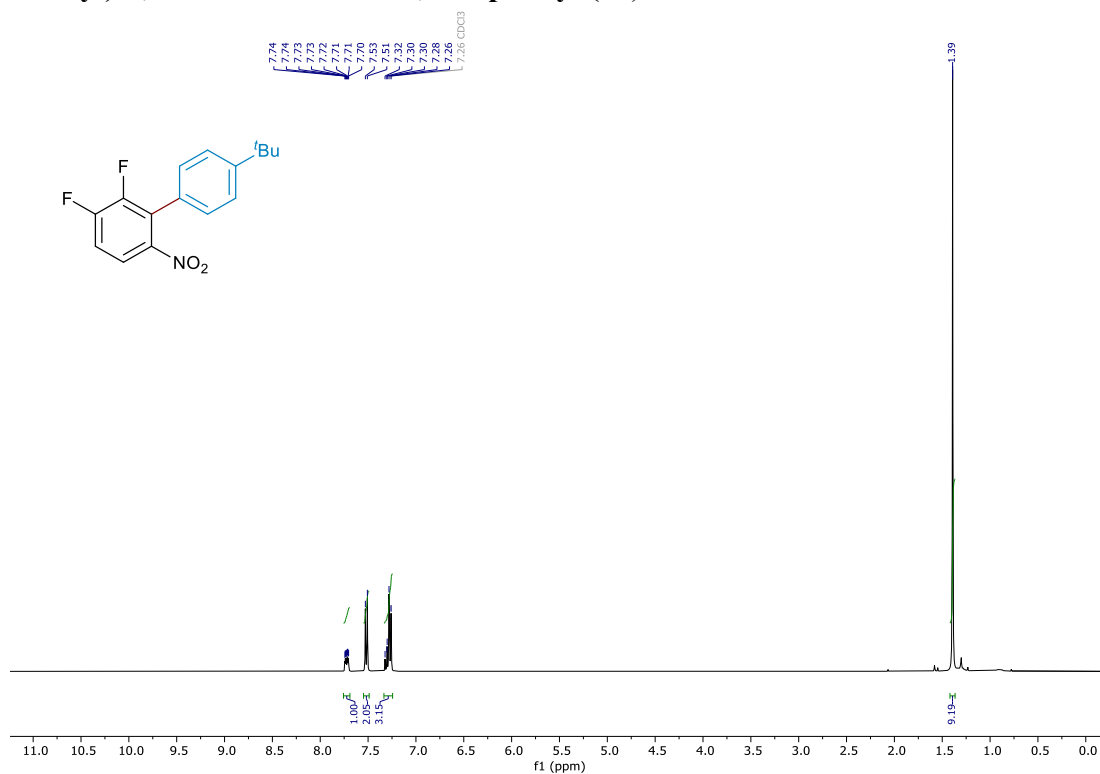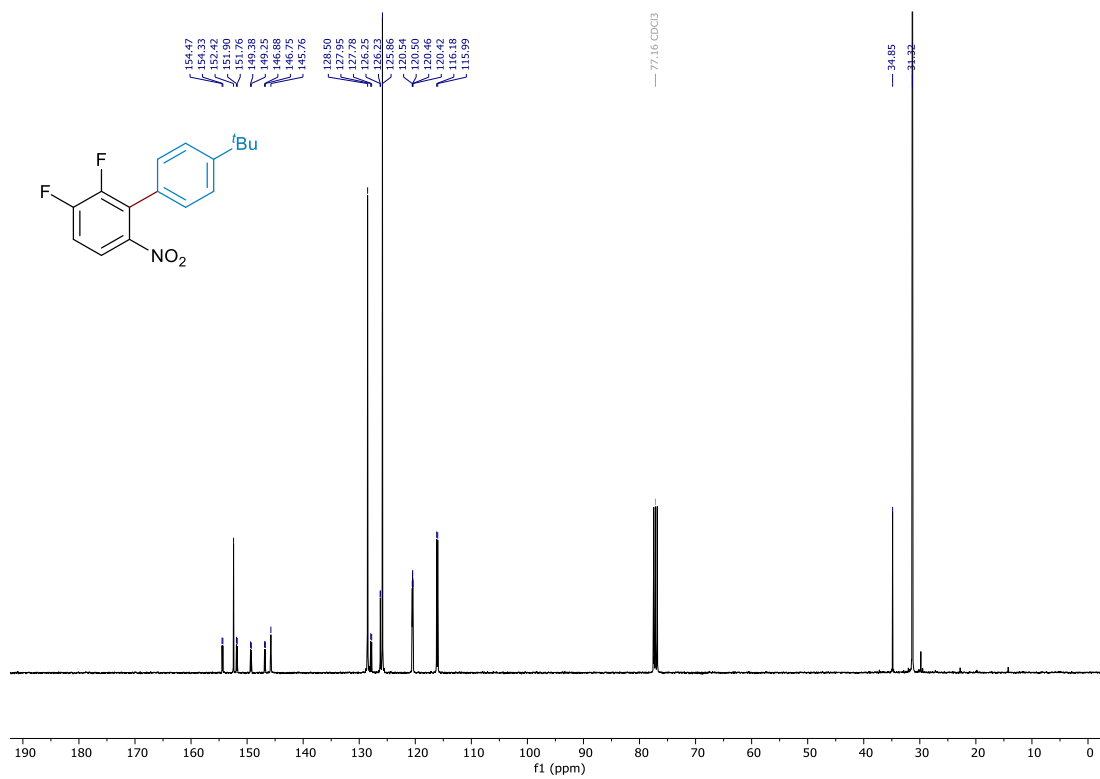

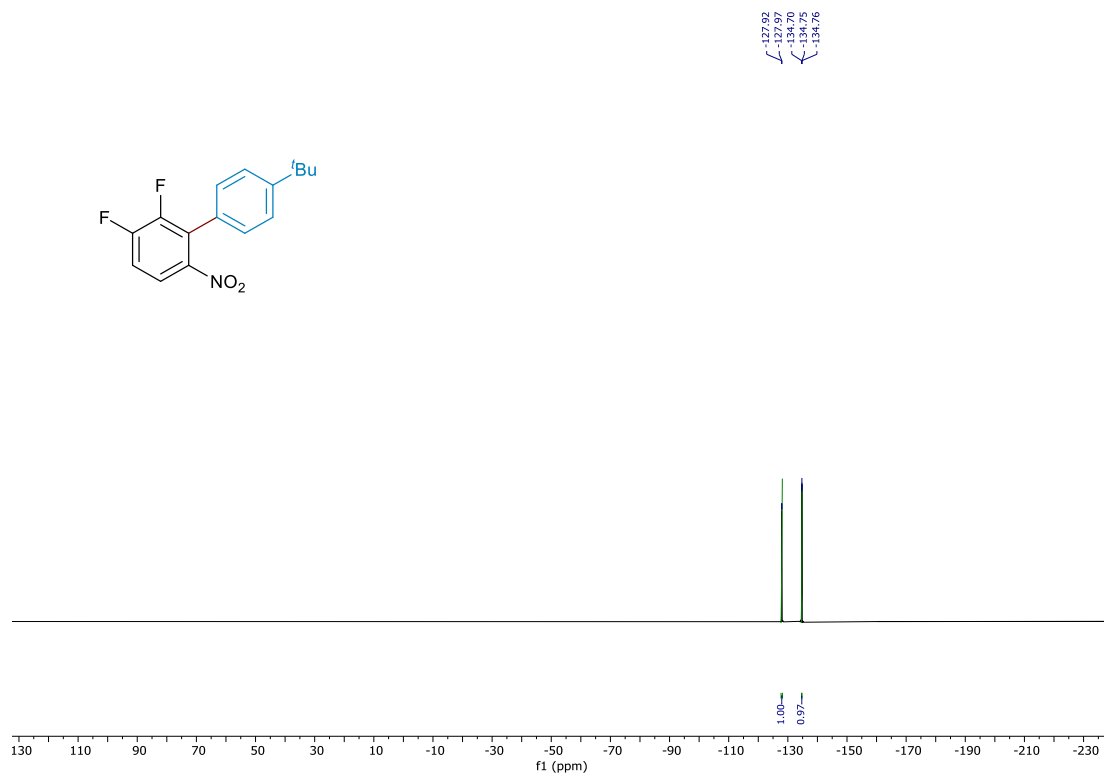

2,3-difluoro-4'-methoxy-6-nitro-1,1'-biphenyl (4b):

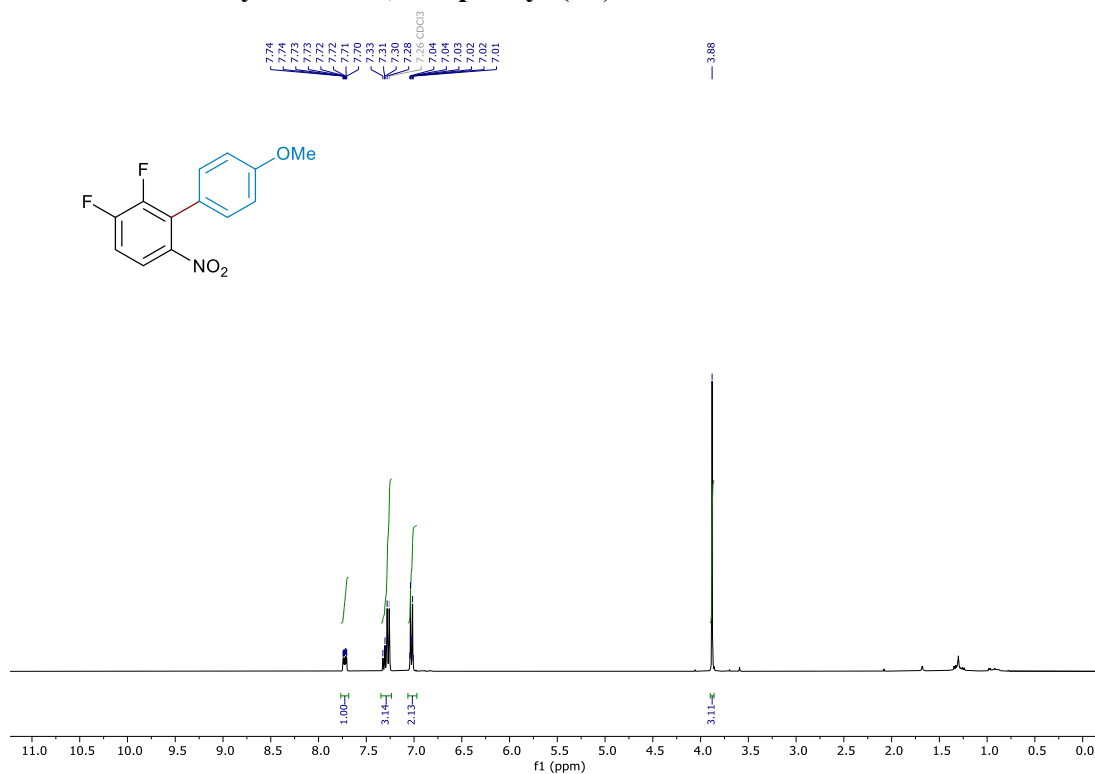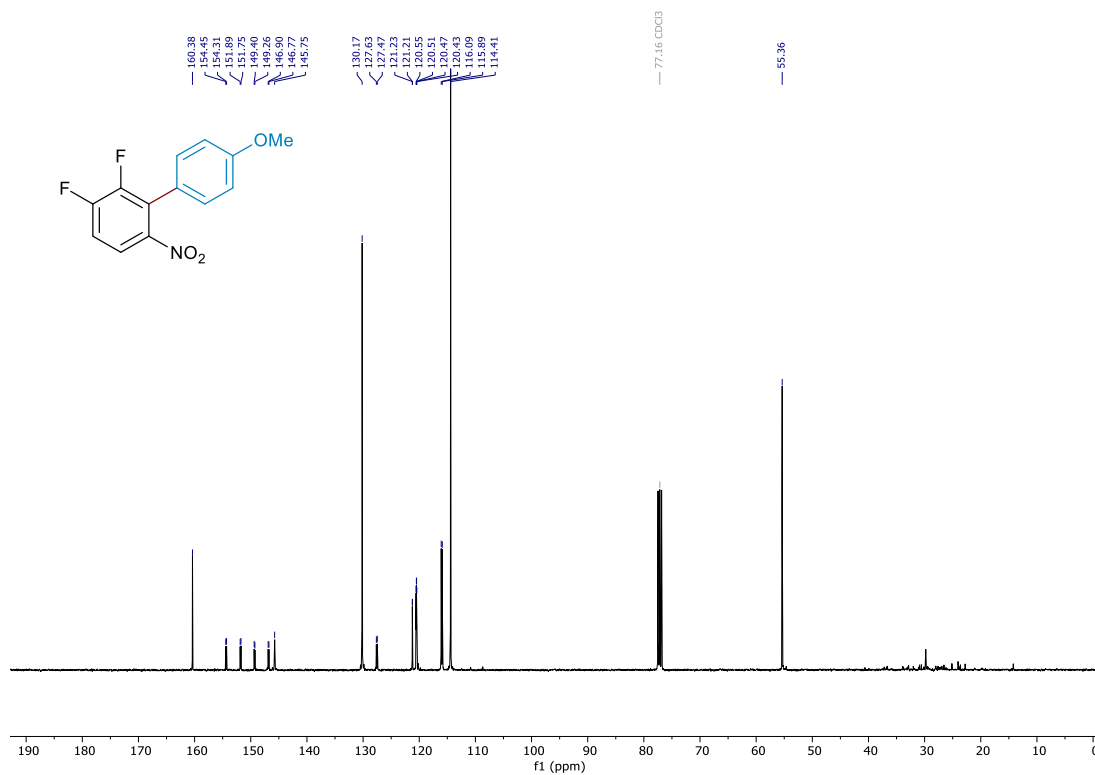

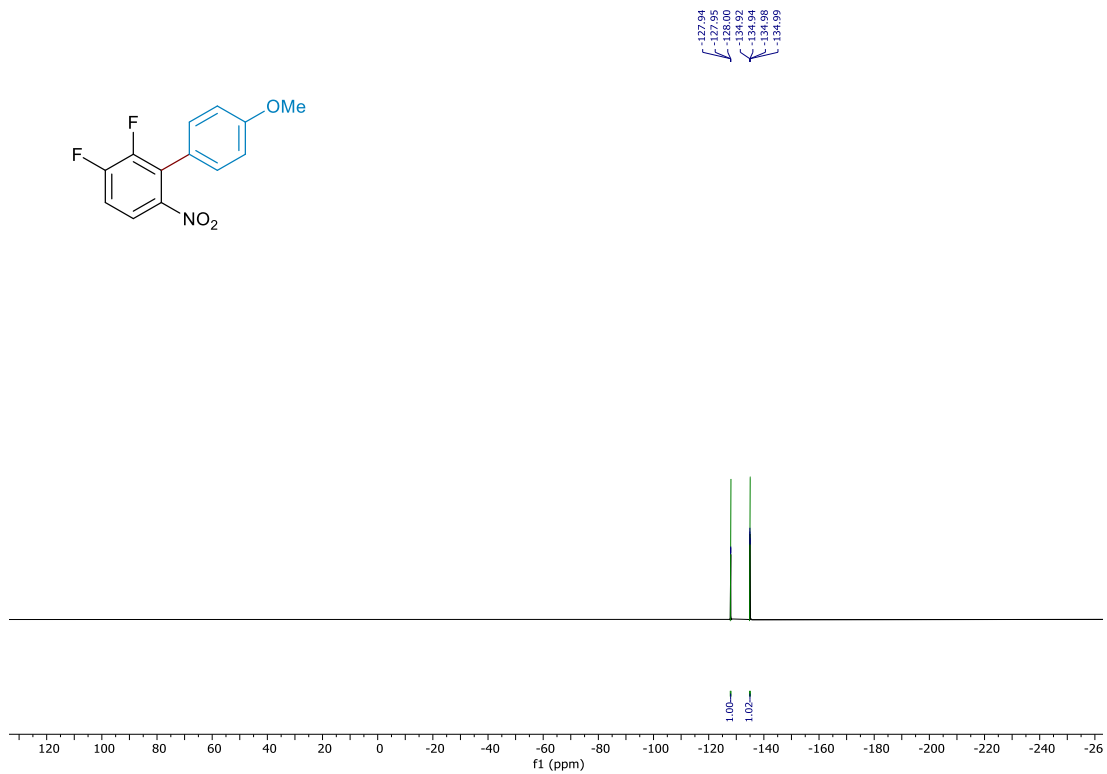

2,3-difluoro-4'-methoxy-3',5'-dimethyl-6-nitro-1,1'-biphenyl (4c):

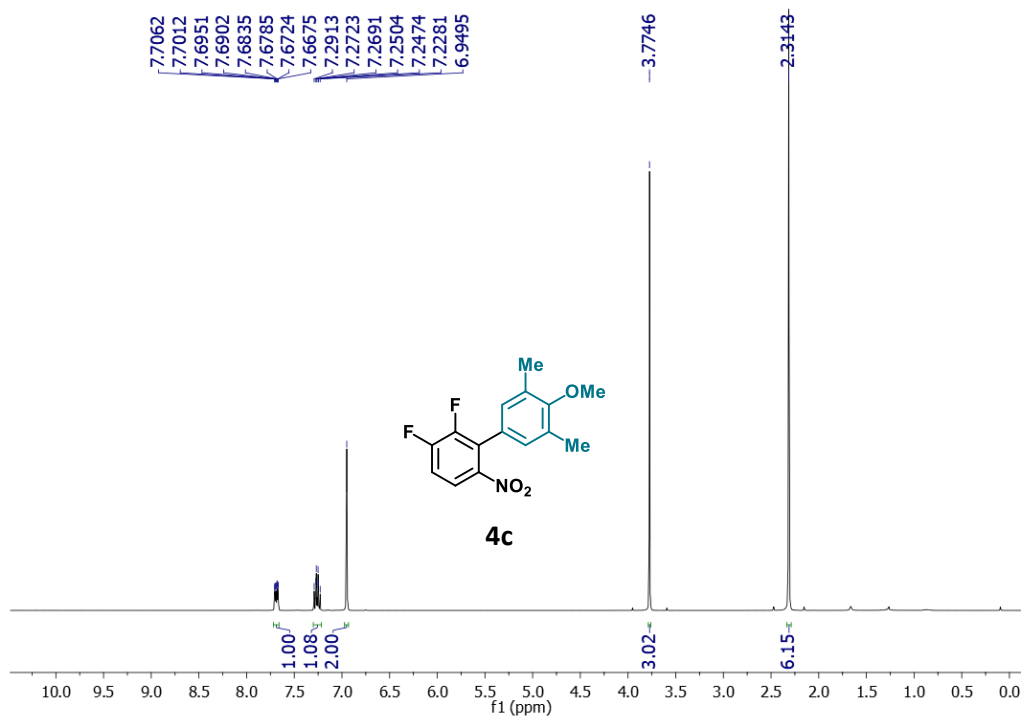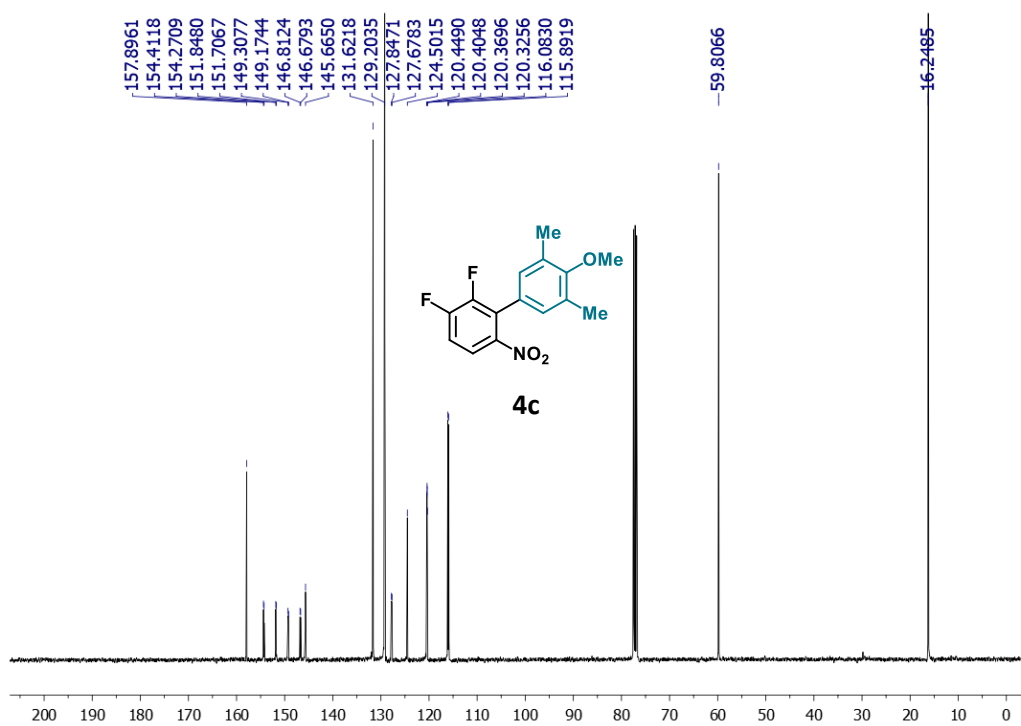

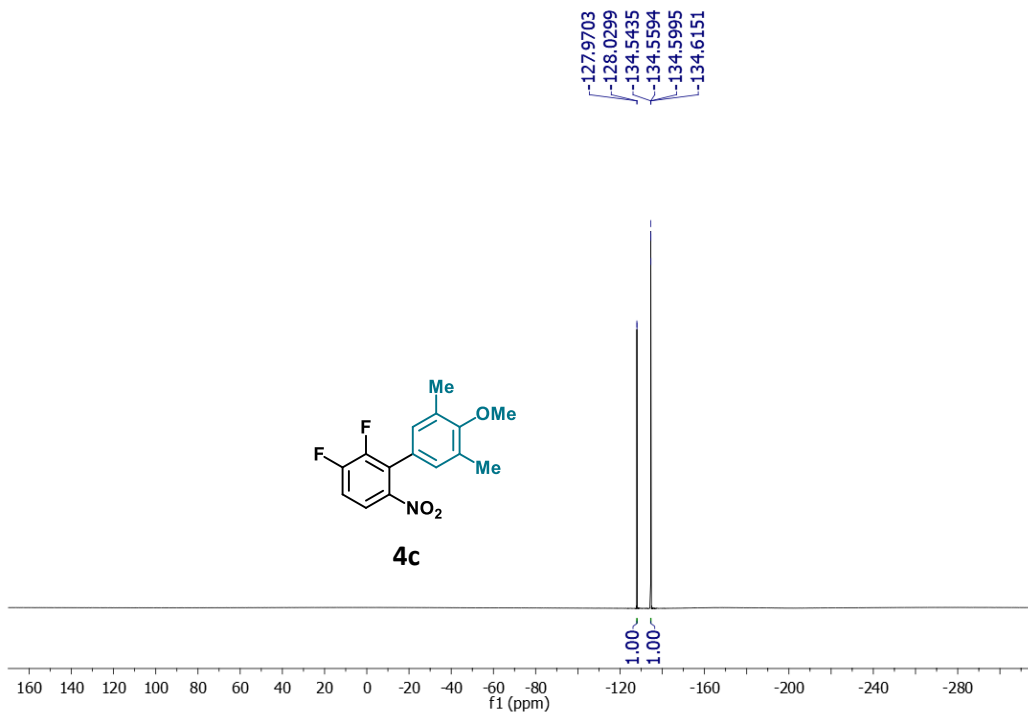

# 2,3,5-trifluoro-6-nitro-1,1'-biphenyl (4d):

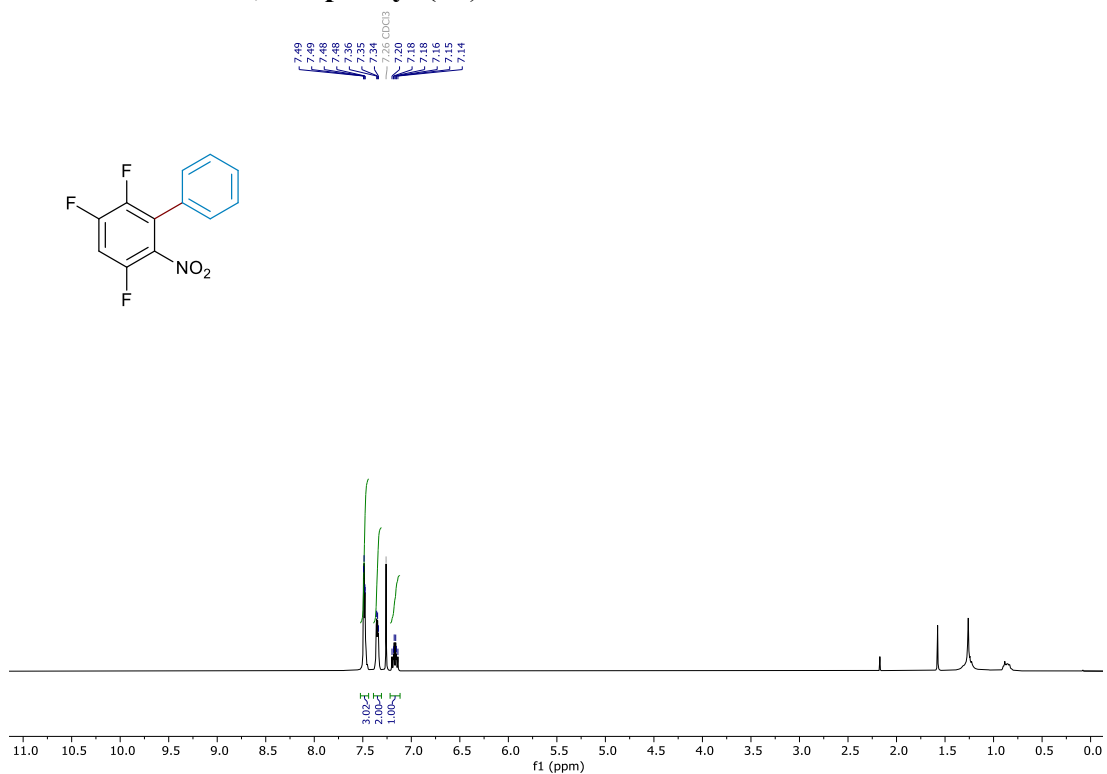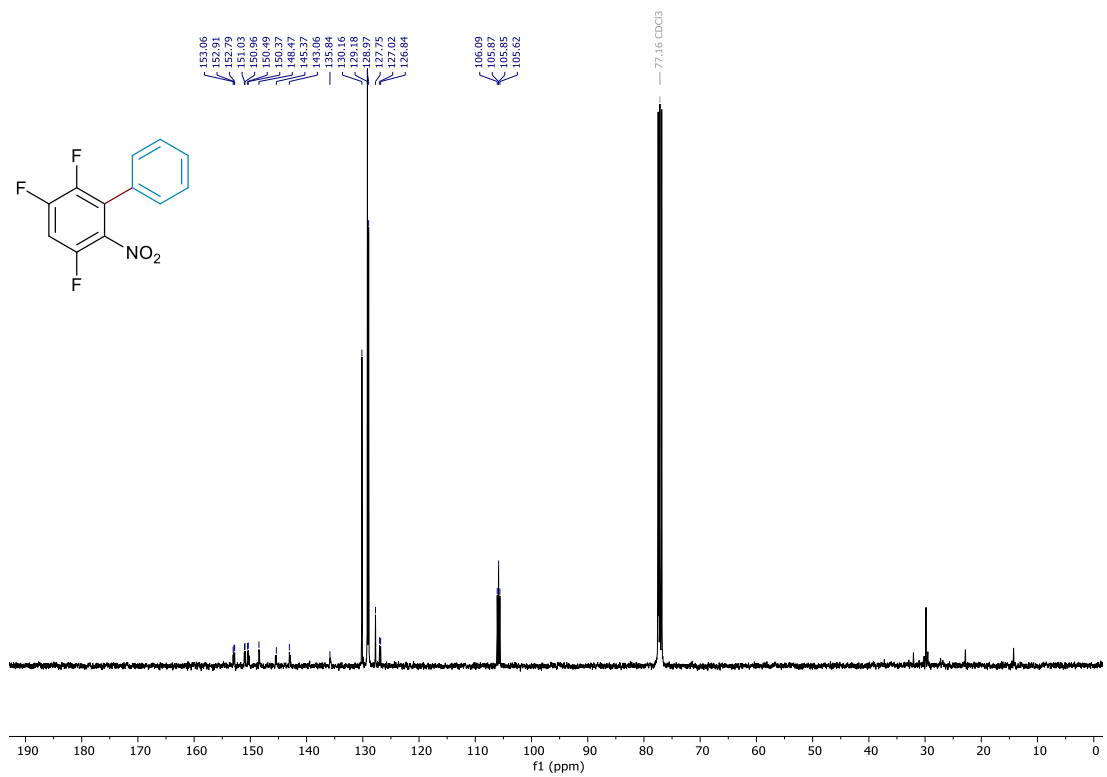

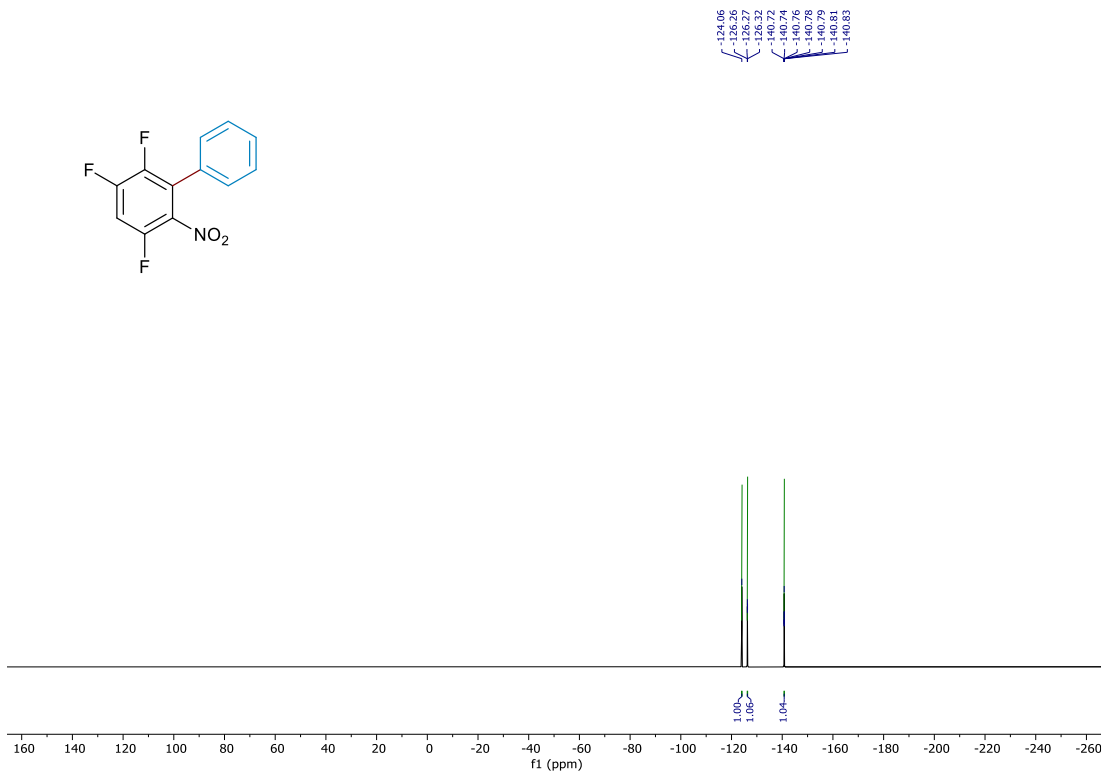

# 2,3,5-trifluoro-4'-methyl-6-nitro-1,1'-biphenyl (4e):

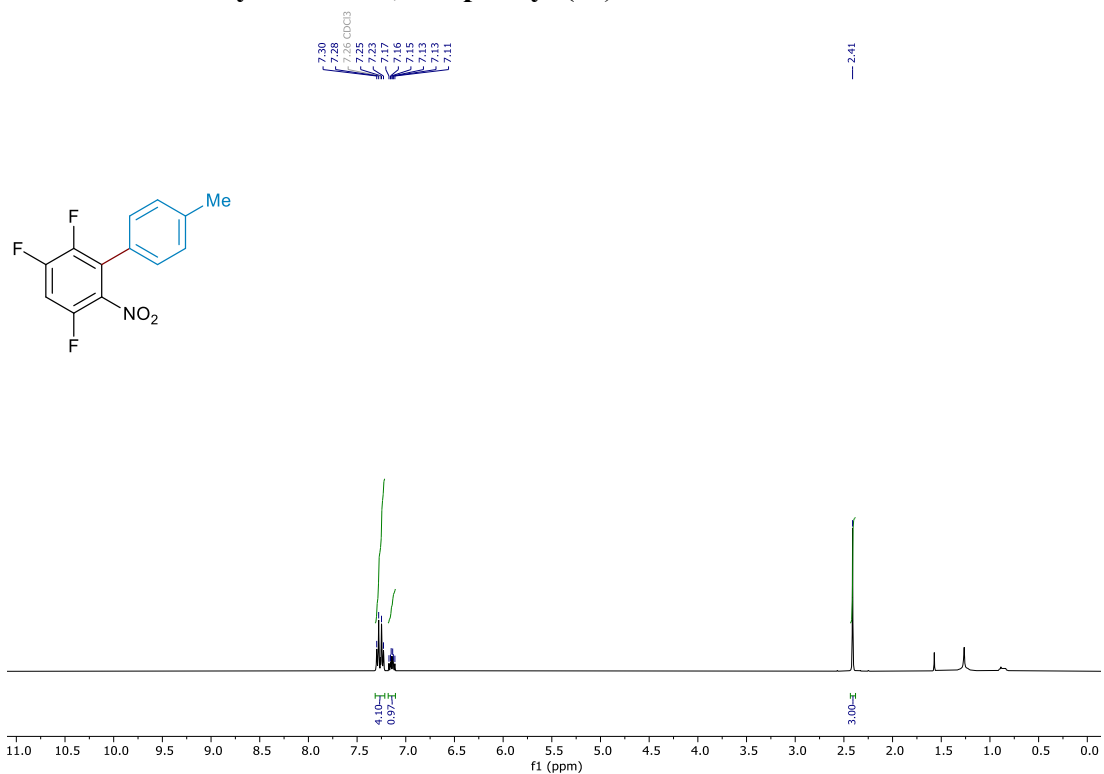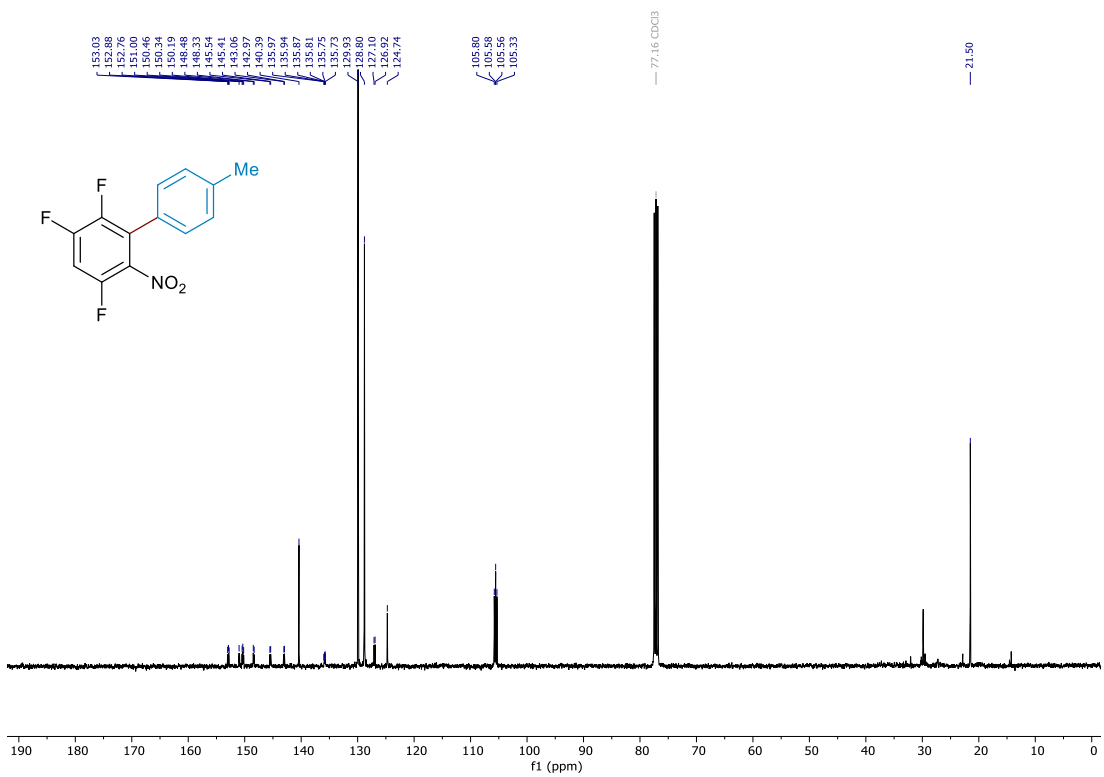

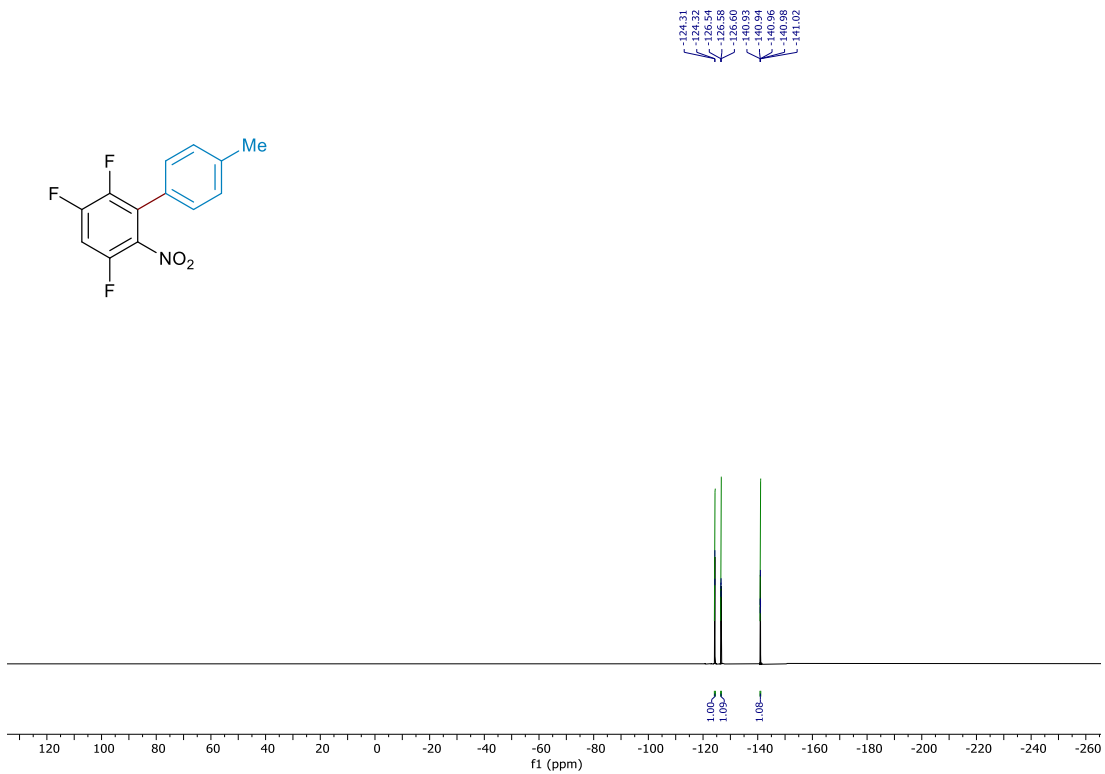

# 4'-(tert-butyl)-2,3,5-trifluoro-6-nitro-1,1'-biphenyl (4f):

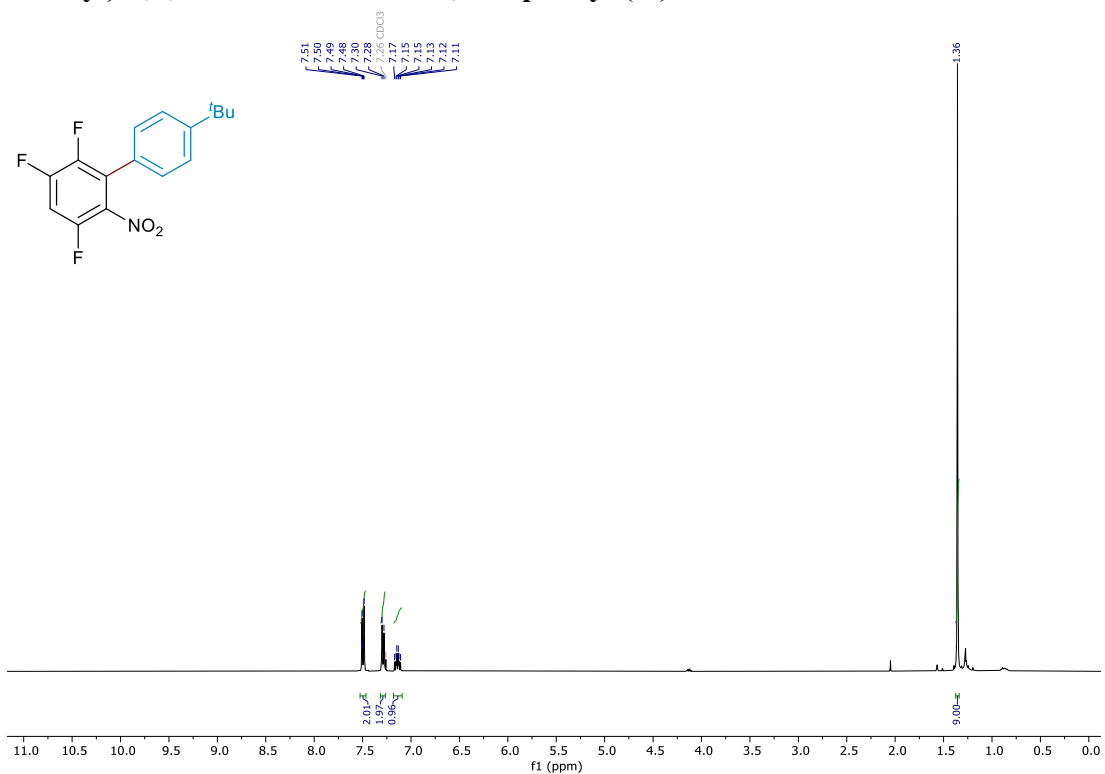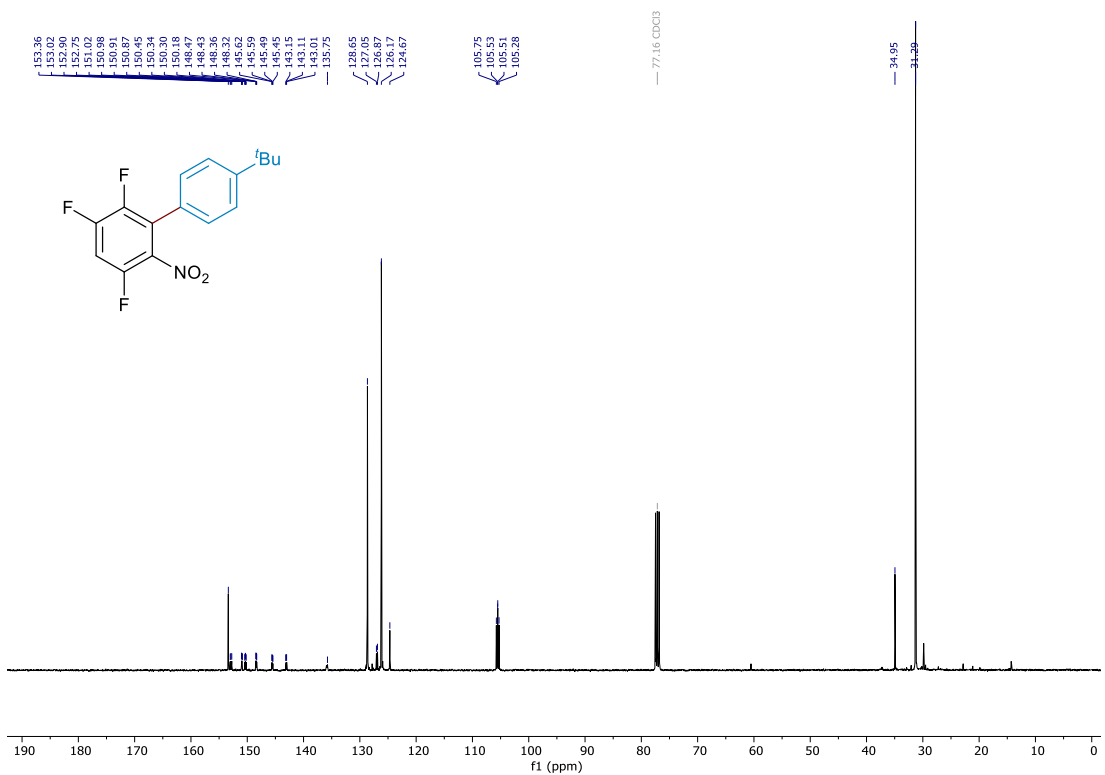

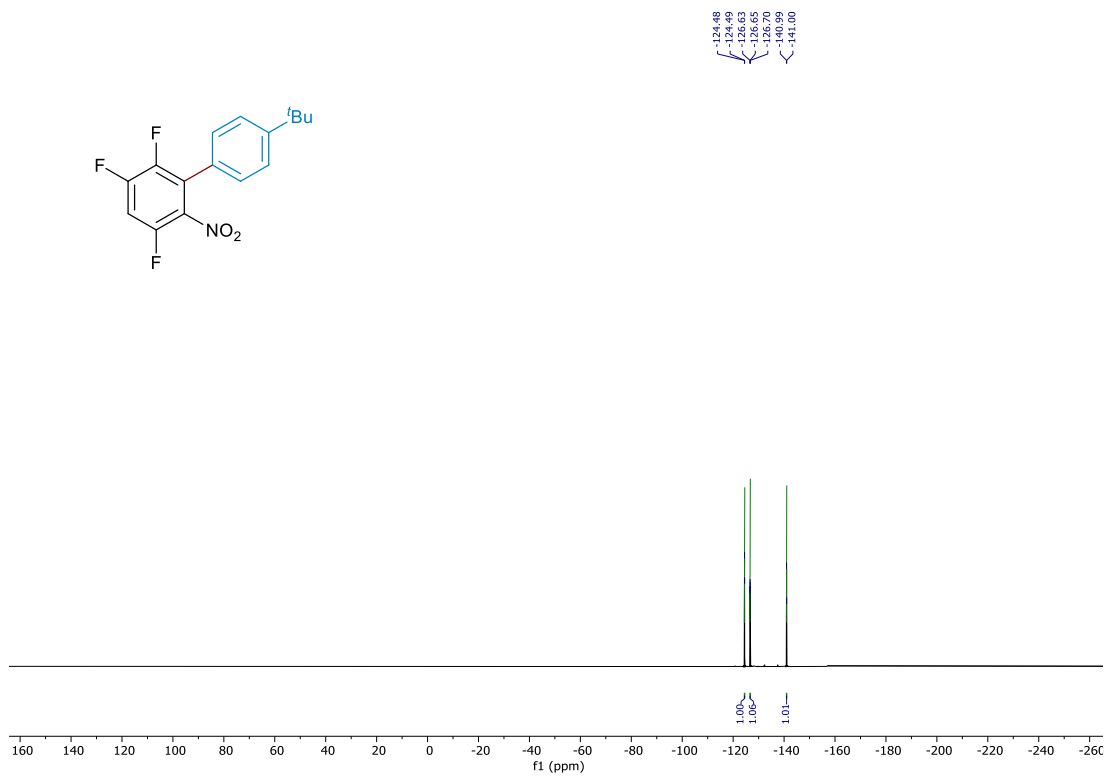

# 2,3,5-trifluoro-3',5'-dimethyl-6-nitro-1,1'-biphenyl (4g):

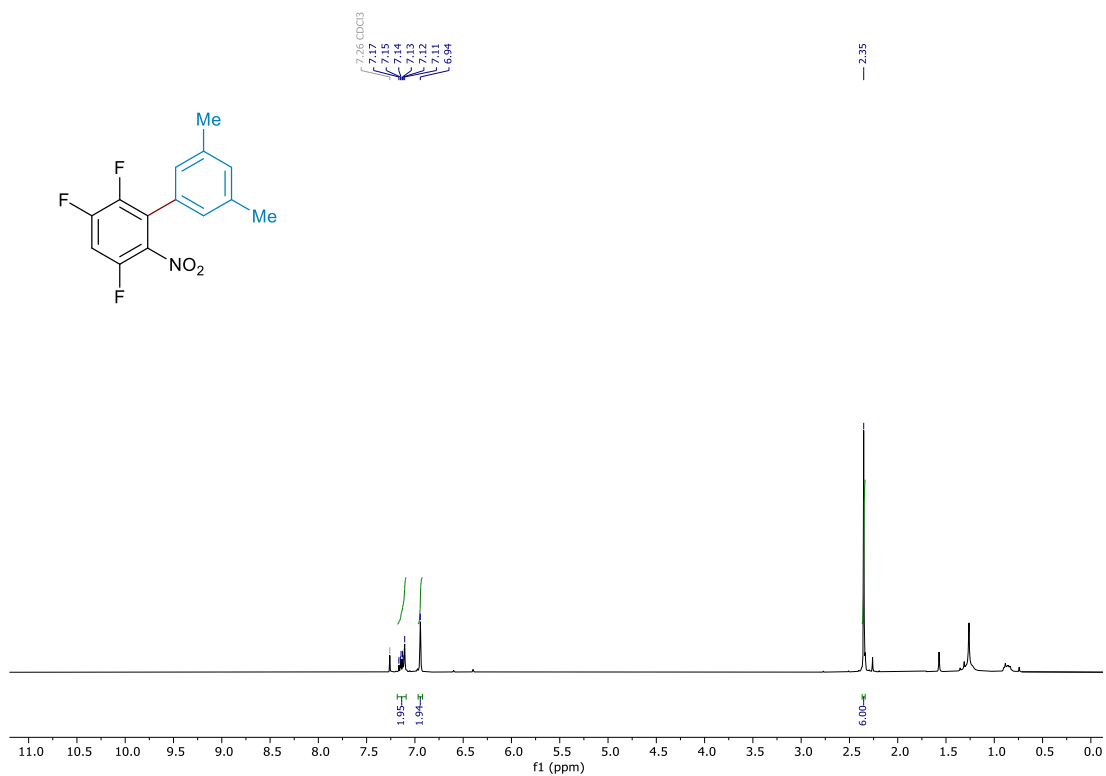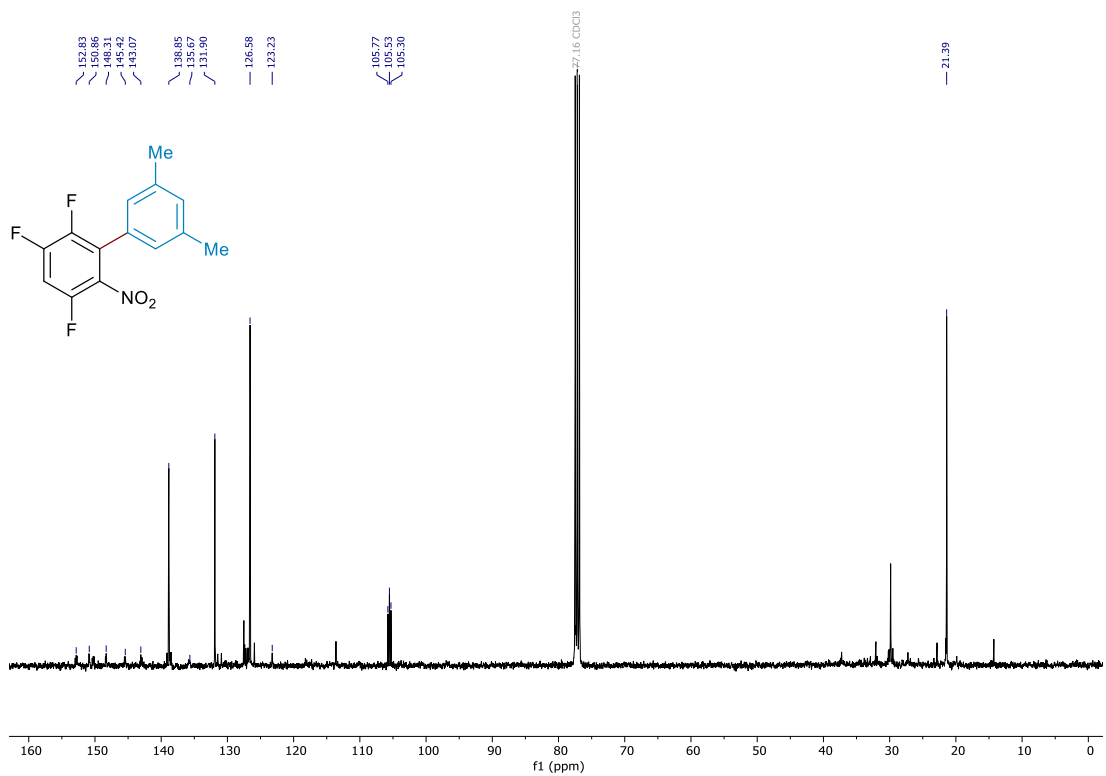

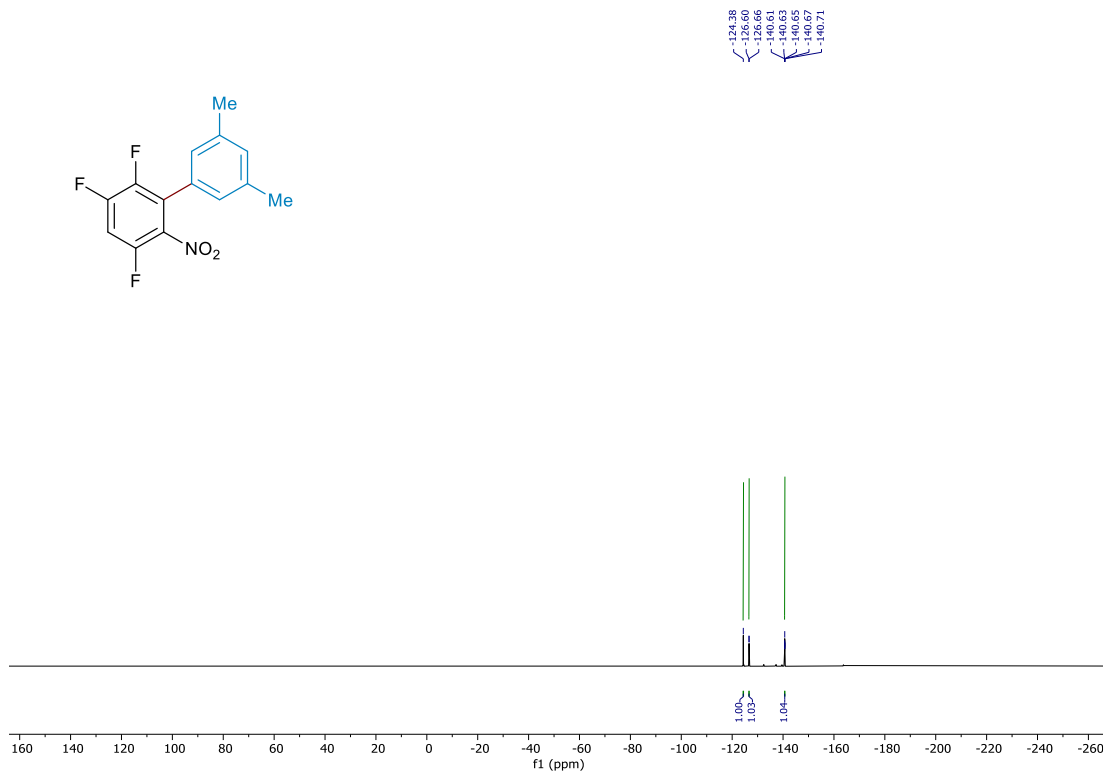

2,3,5-trifluoro-4'-methoxy-3',5'-dimethyl-6-nitro-1,1'-biphenyl (4h):

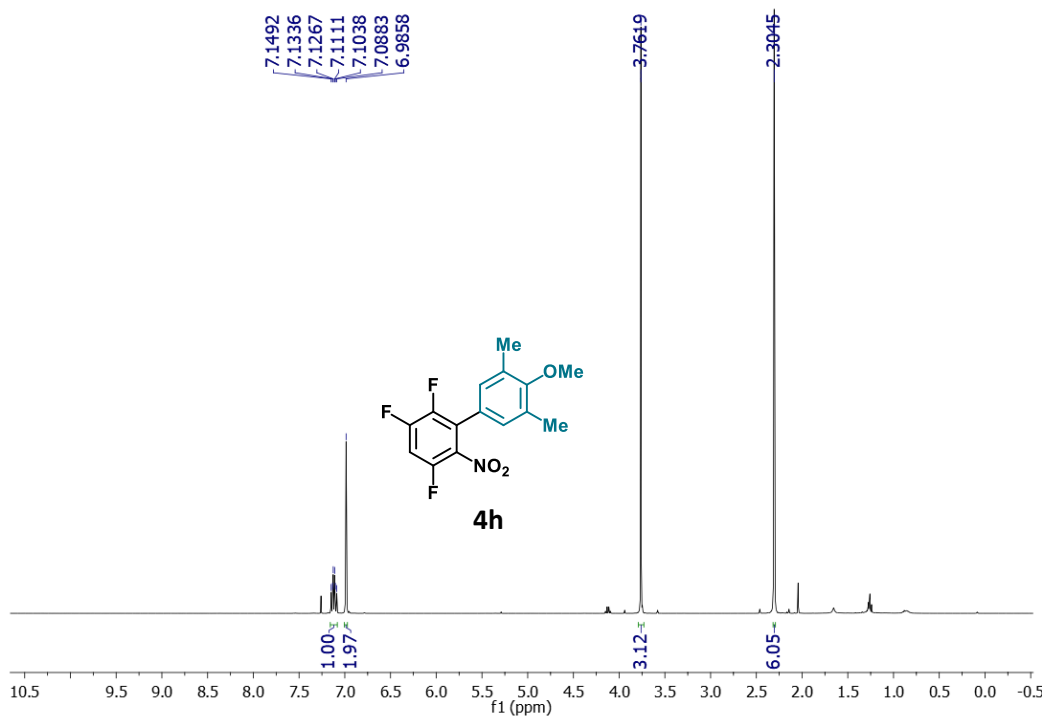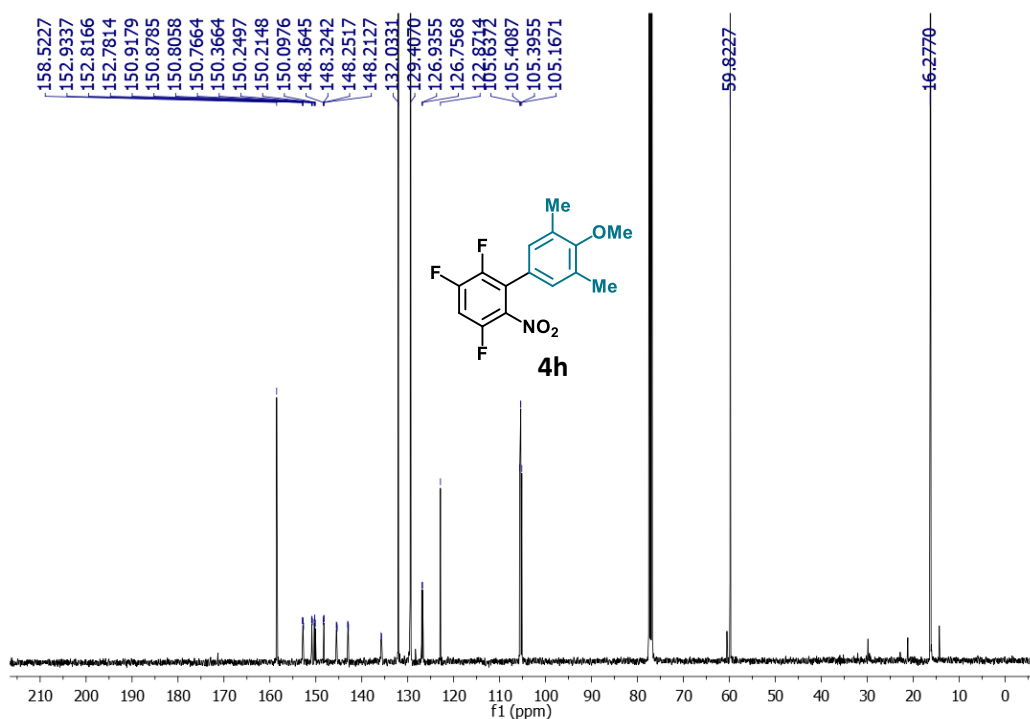

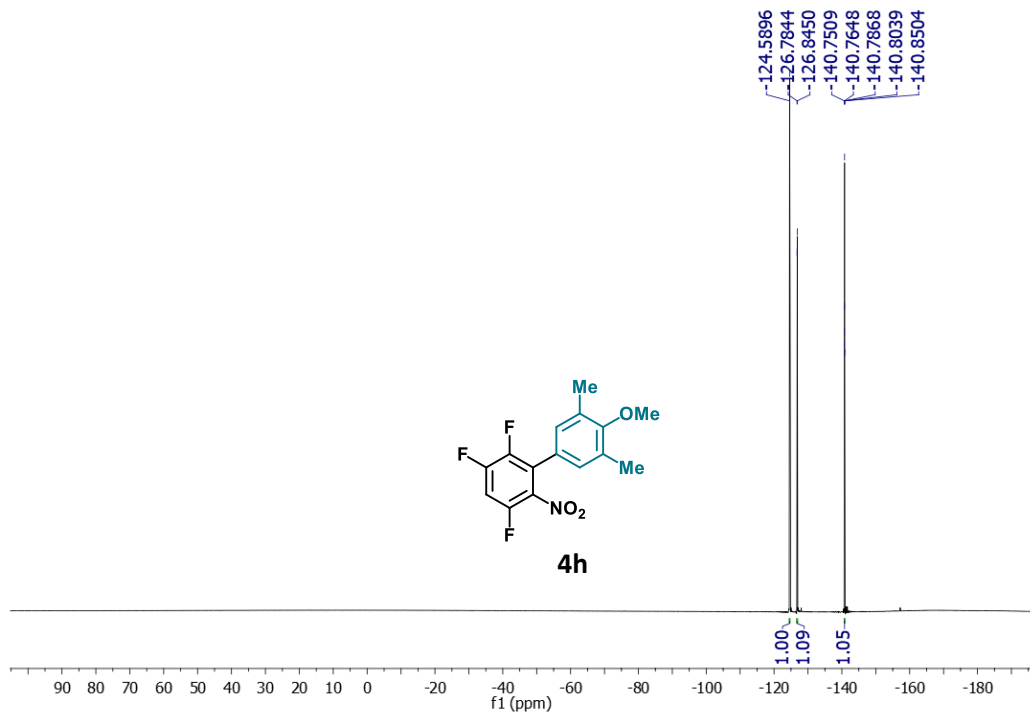

## 2,4-dinitro-1,1'-biphenyl (4i):

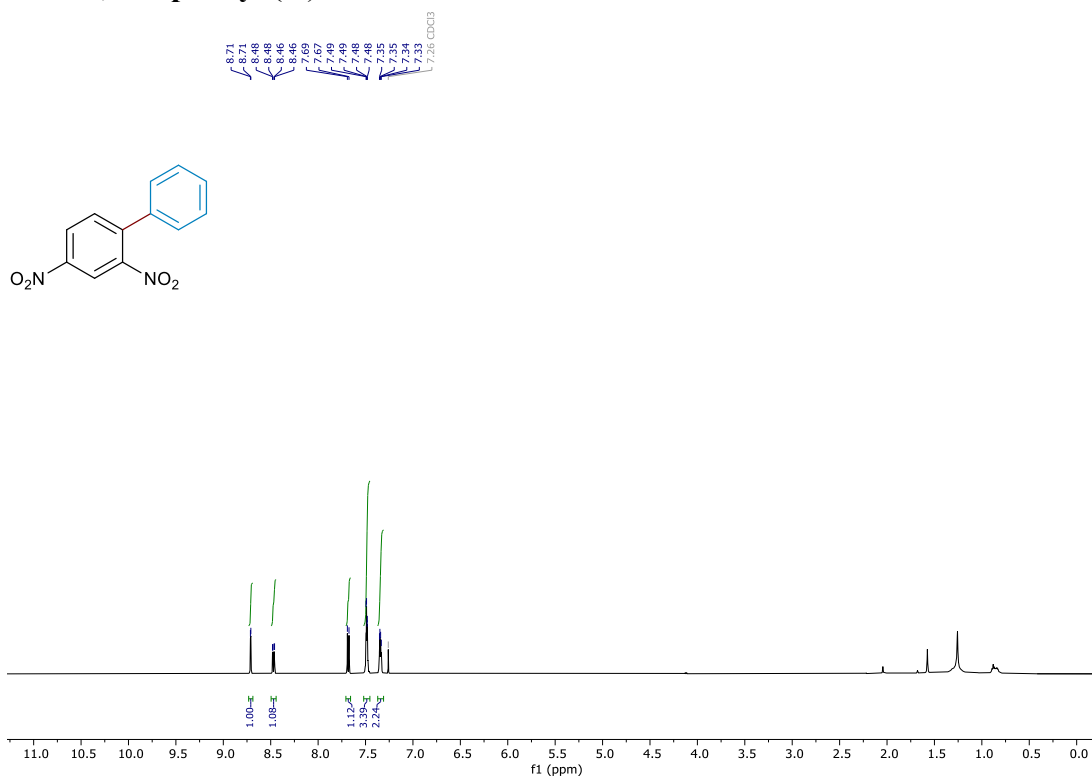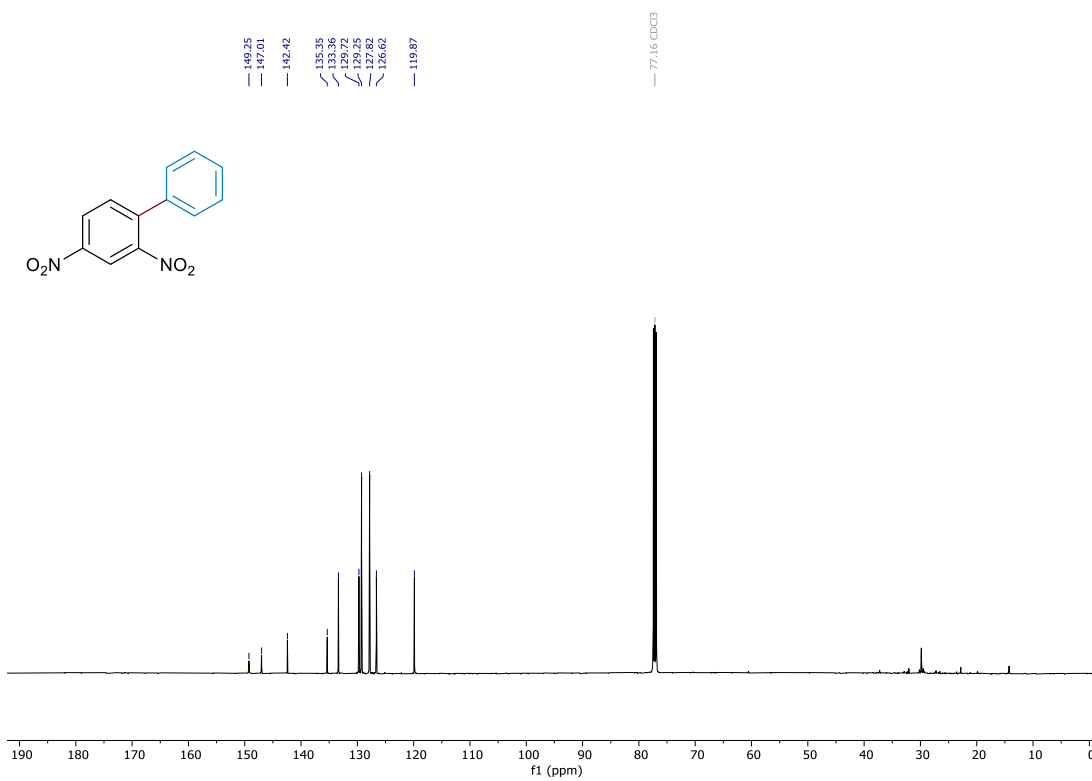

## 10. References

1. Z.-J. Luo, H.-Y. Zhao and X. Zhang, *Org. Lett.*, 2018, **20**, 2543-2546.
2. M. Wakioka, Y. Kitano and F. Ozawa, *Macromolecules*, 2013, **46**, 370-374.
3. K. Tomota, J. Li, H. Tanaka, M. Nakamoto, T. Tsushima and H. Yoshida, *JACS Au.*, 2024, **4**, 3931-3941.
4. T. Niwa, Y. Uetake, M. Isoda, T. Takimoto, M. Nakaoka, D. Hashizume, H. Sakurai and T. Hosoya, *Nat. Catal.*, 2021, **4**, 1080-1088.
5. X.-Y. Huang, X.-X. Mao, C. Dai, M.-Y. Gu, D. Ge, Z.-L. Shen, K. Guo, C.-J. Li and X.-Q. Chu, *JACS Au*, 2026, **6**, 1602-1616.
6. Y. P. Budiman, M. H. Putra, M. R. Ramadhan, R. Hannifah, C. Luz, I. Z. Ghafara, R. Rustaman, E. E. Ernawati, T. Mayanti, A. Groß, U. Radius and T. B. Marder, *Chem. Asian J.*, 2024, **19**, e202400094.
7. L. Ackermann and S. Fenner, *Chem. Commun.*, 2011, **47**, 430-432.
8. M.-A. Wiethoff, L. Lezius and A. Studer, *Angew. Chem. Int. Ed.*, 2025, **64**, e202501757.
9. M. R. Cargill, G. Sandford, A. J. Tadeusiak, D. S. Yufit, J. A. K. Howard, P. Kilickiran and G. Nelles, *J. Org. Chem.*, 2010, **75**, 5860-5866.
10. J. Kan, S. Huang, J. Lin, M. Zhang and W. Su, *Angew. Chem. Int. Ed.*, 2015, **54**, 2199-2203.
